# Supplementary material for: Base-promoted synthesis of dihydrochromeno[4,3-d]pyrrolo[3,4-b]pyridines from 4-chloro-3-substituted coumarins and α-aminomaleimides
Source: Royal Society of Chemistry journal article supplement (doi:10.1039/d3ob00632h), 2023-01-01
Supplement: d3ob00632h1.pdf [file d3ob00632h1.pdf]

## Supporting Information

### Base-Promoted Synthesis of Dihydrochromeno[4,3-*d*]pyrrolo[3,4-*b*]pyridines from 4-Chloro-3-Substituted Coumarins and $\alpha$ -Aminomaleimides

Abdolali Alizadeh,\* Azar Rstampoor

*Department of Chemistry, Tarbiat Modares University, P.O. Box 14115-175, Tehran, Iran*  
*aalizadeh@modares.ac.ir*

#### The Table of Contents

|                                                                                                 |         |
|-------------------------------------------------------------------------------------------------|---------|
| Title, author's name, address and Table of contents                                             | S1      |
| Experimental and general procedure for the synthesis of <b>3a-3h</b> and <b>3'a-3'd</b>         | S1-S2   |
| Characteristic data for compounds <b>3a-3h</b> and <b>3'a-3'd</b>                               | S2-S14  |
| Ortep diagram of compound <b>3b</b>                                                             | S4      |
| <sup>1</sup> H NMR, <sup>13</sup> C NMR, IR and Mass spectra of <b>3a-3h</b> and <b>3'a-3'd</b> | S15-S61 |

#### Experimental Section

##### General remarks:

All reactions were monitored by thin-layer chromatography (TLC) on Merck silica gel 60 F254 plates. The temperatures were monitored using a mercury laboratory thermometer. Melting points were measured on an Electrothermal 9100 apparatus. IR spectra were recorded as KBr pellets on a Nicolet FT-IR 100 spectrophotometer. <sup>1</sup>H NMR (300 MHz) and <sup>13</sup>C{<sup>1</sup>H} NMR (75 MHz) spectra were obtained using Bruker DRX-500 Avance and Bruker DRX-300 Avance spectrometers. All NMR spectra were recorded at r.t in DMSO-*d*<sub>6</sub>. Chemical shifts are reported in parts per million ( $\delta$ ) downfield from an internal TMS reference. Coupling constants (*J* values) are reported in hertz (Hz), and standard abbreviations were used to indicate spin multiplicities. Elemental analyses for C, H, and N were performed using a Heraeus CHN-O-Rapid analyzer. Mass spectra were recorded on a

---

\*Corresponding author, Tel.: +98 21 8800663; fax: +98 21 88006544; e-mail: [aalizadeh@modares.ac.ir](mailto:aalizadeh@modares.ac.ir)

Finnigan-MATT 8430 mass spectrometer operating at an ionization potential of 70 eV. Single crystals of compound **3b** was formed in the mixture of CH<sub>2</sub>Cl<sub>2</sub> and absolute EtOH (1:1 v/v).

**General procedure for the preparation of dihydrochromeno[4,3-*d*]pyrrolo[3,4-*b*]pyridine derivatives 3a-3h.**

A mixture of  $\alpha$ -aminomaleimides (1.0 mmol), 4-chloro-3-vinyl coumarins (1.0 mmol), and triethylamine (50 mol%) in 5 mL ethanol was stirred at reflux temperature until all starting materials had been consumed (the reaction was monitored with TLC). And a red solid was isolated by simple filtration. Derivatives **3a-3g** were purified by washing with hot EtOH twice and derivative **3h** was purified by column chromatography (hexane/AcOEt, 4/1, v/v).

**General procedure for the preparation of dihydrochromeno[4,3-*d*]pyrrolo[3,4-*b*]pyridine derivatives 3'a-3'd.**

A mixture of  $\alpha$ -aminomaleimides (2.0 mmol), 4-chloro-3-formyl coumarin (1.0 mmol), and triethylamine (50 mol%) in 5 mL ethanol was stirred at reflux until all starting materials had been consumed (the reaction was monitored with TLC). And a red solid was isolated by simple filtration. Derivatives **3'a-3'c** were purified by washing with hot EtOH twice and derivative **3d'** was purified by column chromatography (hexane/AcOEt, 4/1, v/v).

**Characteristic data for compounds 3a-3h and 3'a-3'd.**

**2-Methyl-5-(2-oxo-2-phenylethyl)-4-phenyl-4,5-dihydrochromeno[4,3-*d*]pyrrolo[3,4-*b*]pyridine-1,3,6(2*H*)-trione (3a).**

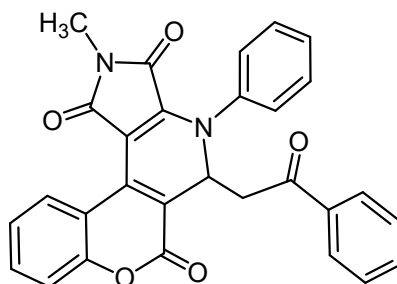

Light red solid, m.p = 120-122 °C (dec.), 0.42 g, yield: 88%. IR (KBr) ( $\nu_{\max}$ , cm<sup>-1</sup>): 1697 (OCNCO and COO), 1672 (C=O), 1606, 1570 and 1437 (Ar), 1251 and 1101 (C-O), 1202 (C-N), 741 (C-H) cm<sup>-1</sup>. <sup>1</sup>H NMR (300.13 MHz, DMSO-*d*<sub>6</sub>): 2.90 (3H, s, Me), 3.57 (1H, ABqd, <sup>3</sup>J<sub>HH</sub> = 16.1 Hz, <sup>2</sup>J<sub>HH</sub> =

5.1 Hz, CH of CH<sub>2</sub>), 3.84 (1H, ABqd, <sup>3</sup>J<sub>HH</sub> = 16.1 Hz, <sup>2</sup>J<sub>HH</sub> = 6.2 Hz, CH of CH<sub>2</sub>), 5.81 (1H, t, <sup>3</sup>J<sub>HH</sub> = 5.6 Hz, CHN), 7.32-7.47 (7H, m, 5CH of Ph and 2CH of coumarin), 7.59 (1H, t, <sup>3</sup>J<sub>HH</sub> = 7.1 Hz, CH of Ph), 7.63 (1H, d, <sup>3</sup>J<sub>HH</sub> = 8.7 Hz, CH<sup>9</sup> of coumarin), 7.72 (2H, d, <sup>3</sup>J<sub>HH</sub> = 7.9 Hz, 2CH of Ph), 7.90 (2H, d, <sup>3</sup>J<sub>HH</sub> = 7.9 Hz, 2CH of Ph), 9.1 (1H, dd, <sup>3</sup>J<sub>HH</sub> = 8.8 Hz, <sup>2</sup>J<sub>HH</sub> = 1.8 Hz, CH<sup>11</sup> of coumarin). <sup>13</sup>C NMR (75.46 MHz, DMSO-*d*<sub>6</sub>): 23.90 (Me), 41.89 (CH<sub>2</sub>), 58.54 (CHN), 107.92 (C<sup>5a</sup>), 108.27 (CH<sup>11a</sup>), 115.32 (CH<sup>11a</sup>), 116.75 (CH<sup>8</sup> of coumarin), 124.14 (CH of Ph), 124.87 (2CH of Ph), 127.64 (CH<sup>10</sup> of coumarin), 128.19 (2CH of Ph), 128.69 (2CH of Ph), 128.90 (CH<sup>11</sup> of coumarin), 129.08 (2CH of Ph), 131.93 (CH<sup>9</sup> of coumarin), 133.43 (CH of Ph), 136.53 (C<sub>ipso</sub>-CO), 136.84 (C<sub>ipso</sub>-N), 141.54 (C<sup>3a</sup>), 148.76 (C<sup>11b</sup>), 152.35 (C<sup>7a</sup>), 158.55 (COO), 161.92 (CON), 166.78 (CON), 196.9 (CO). MS (EI, 70 eV) *m/z* (%): 476 (M<sup>+</sup>, 7), 371 (12), 358 (53), 357 (100), 281 (12), 104 (41), 90 (23), 77 (78), 50 (13). Anal. calcd. for C<sub>29</sub>H<sub>20</sub>N<sub>2</sub>O<sub>5</sub> (476.14): C, 73.10; H, 4.23; N, 5.88. Found: C, 73.15; H, 4.25; N, 5.81%.

**2-Methyl-5-[2-(4-methylphenyl)-2-oxoethyl]-4-phenyl-4,5-dihydrochromeno[4,3-*d*]pyrrolo[3,4-*b*]pyridine-1,3,6(2*H*)-trione (3b).**

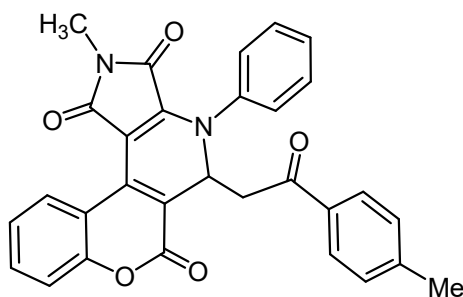

Light red solid, m.p = 157-159 °C (dec.), 0.41 g, yield: 85%. IR (KBr) ( $\nu_{\max}$ , cm<sup>-1</sup>): 1701 (OCNCO and COO), 1664 (C=O), 1598, 1566 and 1430 (Ar), 1261 and 1091 (C-O), 1197 (C-N), 764 (C-H) cm<sup>-1</sup>. <sup>1</sup>H NMR (300.13 MHz, DMSO-*d*<sub>6</sub>): 2.31 (3H, s, Me), 2.89 (3H, s, Me), 3.47 (H, ABq, <sup>3</sup>J<sub>HH</sub> = 15.8 Hz, CH of CH<sub>2</sub>), 3.82 (H, ABq, <sup>3</sup>J<sub>HH</sub> = 15.8 Hz, CH of CH<sub>2</sub>), 5.75 (1H, bs, CHN), 7.23 (2H, d, <sup>3</sup>J<sub>HH</sub> = 7.7 Hz, 2CH of Ar), 7.39 (1H, d, <sup>3</sup>J<sub>HH</sub> = 8.4 Hz, CH of CH<sup>8</sup> of coumarin), 7.40- 7.46 (4H, m, CH<sup>10</sup> of coumarin and 4CH of Ar), 7.58 (2H, d, <sup>3</sup>J<sub>HH</sub> = 8.2 Hz, 2CH of Ar), 7.63 (1H, t, <sup>3</sup>J<sub>HH</sub> = 7.5 Hz, CH<sup>9</sup> of coumarin), 7.78 (2H, d, <sup>3</sup>J<sub>HH</sub> = 7.7 Hz, 2CH of Ar), 9.05 (1H, d, <sup>3</sup>J<sub>HH</sub> = 8.1 Hz, CH<sup>11</sup> of coumarin). <sup>13</sup>C NMR (75.46 MHz, DMSO-*d*<sub>6</sub>): 21.13 (Me), 23.89 (Me), 41.74 (CH<sub>2</sub>), 58.31 (CHN),

108.31 (C<sup>5a</sup>), 108.91 (CH<sup>11a</sup>), 115.26 (CH<sup>11c</sup>), 116.76 (CH<sup>8</sup> of coumarin), 124.15 (CH<sup>10</sup> of coumarin), 126.69 (2CH of Ar), 128.31 (2CH of Ar), 128.86 (CH of Ar), 128.98 (2CH of Ar), 129.22 (2CH of Ar), 131.95 (CH<sup>9</sup> and CH<sup>11</sup> of coumarin), 134.06 (C<sub>ipso</sub>-N), 136.76 (C<sub>ipso</sub>-CO), 140.38 (C<sup>3a</sup>), 143.97 (C<sub>ipso</sub>-Me), 148.57 (C<sup>11b</sup>), 152.35 (C<sup>7a</sup>), 158.47 (COO), 161.99 (CON), 166.77 (CON), 196.39 (CO). MS (EI, 70 eV) *m/z* (%): 490 (M<sup>+</sup>, 3), 371 (4), 358 (26), 357 (100), 294 (11), 281 (7), 272 (6), 244 (5), 216 (4), 197 (6), 119 (46), 105 (25), 106 (6), 93 (5), 91 (43), 89 (6), 79 (9), 77 (75), 65 (25), 51 (16). Anal. calcd. for C<sub>30</sub>H<sub>22</sub>N<sub>2</sub>O<sub>5</sub> (490.15): C, 73.46; H, 4.52; N, 5.71. Found: C, 73.40; H, 4.55; N, 5.74%. Crystal data for **3b** C<sub>30</sub>H<sub>22</sub>N<sub>2</sub>O<sub>5</sub> (CCDC 2254629): M<sub>w</sub> = 490.49, monoclinic, P 1 21/c 1, a = 11.679(2) Å, b = 15.814(3) Å, c = 13.357(3) Å, α = 90, β = 101.12(3), γ = 90, V = 2420.6(9) Å<sup>3</sup>, Z = 4, D<sub>c</sub> = 1.346 mg/m<sup>3</sup>, F(000) = 1024, crystal dimension 0.45 × 0.32 × 0.28 mm, radiation, Mo Kα (λ = 0.71073 Å), 1.777 ≤ 2θ ≤ 25.000, intensity data were collected at 293.15 K with a Bruker APEX area-detector diffractometer, and employing ω/2θ scanning technique, in the range of -13 ≤ h ≤ 13, -18 ≤ k ≤ 18, -15 ≤ l ≤ 15, the structure was solved by a direct method, all non-hydrogen atoms were positioned and anisotropic thermal parameters refined from 3675 observed reflections with R (into) = 0.0378 by a full-matrix least-squares technique converged to R1 = 0.0536, and wR2 = 0.1211 [I > 2σ(I)].

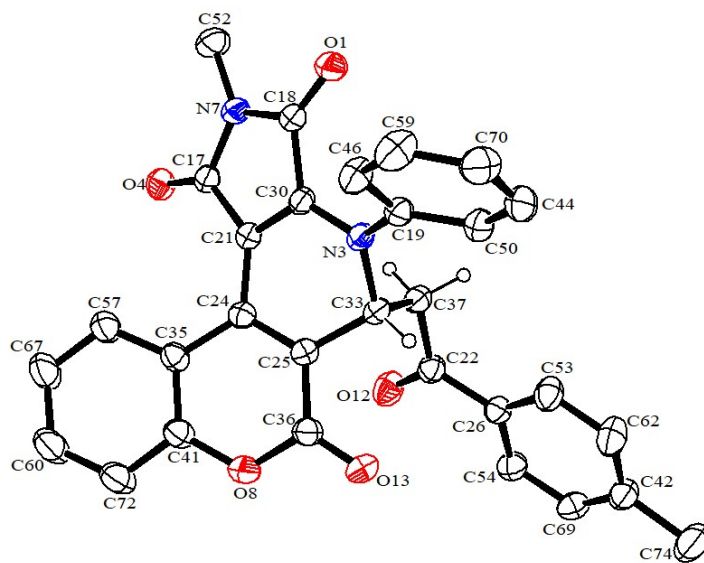

Ortep diagram of compound **3b**

**4-(4-Chlorophenyl)-2-methyl-5-(2-oxo-2-phenylethyl)-4,5-dihydrochromeno[4,3-*d*]pyrrolo[3,4-*b*]pyridine-1,3,6(2*H*)-trione (3c).**

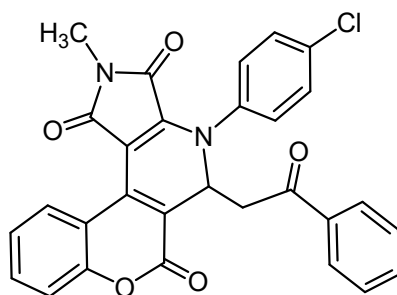

Light red solid, m.p = 227-228 °C (dec.), 0.39 g, yield: 77%. IR (KBr) ( $\nu_{\max}$ ,  $\text{cm}^{-1}$ ): 1702 (OCNCO and COO), 1670 (C=O), 1612, 1572 and 1458 (Ar), 1250 and 1105 (C-O), 1197 (C-N), 1012 (C-Cl), 759 (C-H)  $\text{cm}^{-1}$ .  $^1\text{H}$  NMR (300.13 MHz,  $\text{DMSO-}d_6$ ): 2.89 (3H, s, Me), 3.53 (1H, ABqd,  $^3J_{\text{HH}} = 16.6$  Hz,  $^2J_{\text{HH}} = 4.8$  Hz, CH of  $\text{CH}_2$ ), 3.88 (1H, ABqd,  $^3J_{\text{HH}} = 16.6$  Hz,  $^2J_{\text{HH}} = 6.0$  Hz, CH of  $\text{CH}_2$ ), 5.78 (1H, t,  $^3J_{\text{HH}} = 5.6$  Hz, CHN), 7.39 (2H, d,  $^3J_{\text{HH}} = 8.3$  Hz, 2CH of Ar), 7.40 (2H, d,  $^3J_{\text{HH}} = 8.3$  Hz,  $\text{CH}^8$  of coumarin), 7.42 (1H, t,  $^3J_{\text{HH}} = 8.4$  Hz,  $\text{CH}^{10}$  of coumarin), 4.44-7.48 (3H, m, 3H of Ar), 7.59 (1H, t,  $^3J_{\text{HH}} = 8.3$  Hz, 2CH of Ar), 7.63 (1H, t,  $^3J_{\text{HH}} = 7.5$  Hz,  $\text{CH}^9$  of coumarin), 7.89 (2H, d,  $^3J_{\text{HH}} = 7.7$  Hz, 2CH of Ar), 9.07 (1H, d,  $^3J_{\text{HH}} = 8.1$  Hz,  $\text{CH}^{11}$  of coumarin).  $^{13}\text{C}$  NMR (75.46 MHz,  $\text{DMSO-}d_6$ ): 23.90 (Me), 41.85 ( $\text{CH}_2$ ), 58.19 (CHN), 108.25 ( $\text{C}^{5a}$ ), 108.89 ( $\text{CH}^{11a}$ ), 115.26 ( $\text{CH}^{11c}$ ), 116.75 ( $\text{CH}^8$  of coumarin), 124.16 ( $\text{CH}^{10}$  of coumarin), 126.73 (2CH of Ar), 128.18 (2CH of Ar), 128.68 (2CH of Ar), 128.85 (C-Cl), 128.98 (2CH of Ar), 131.96 ( $\text{CH}^9$  and  $\text{CH}^{11}$  of coumarin), 133.47 (CH of Ar), 136.42 ( $\text{C}_{\text{ipso-N}}$ ), 136.77 ( $\text{C}_{\text{ipso-CO}}$ ), 140.36 ( $\text{C}^{3a}$ ), 148.58 ( $\text{C}^{11b}$ ), 152.34 ( $\text{C}^{7a}$ ), 158.48 (COO), 162.02 (CON), 166.77 (CON), 196.87 (CO). MS (EI, 70 eV)  $m/z$  (%): 510 ( $\text{M}^+$ , 2), 405 (4), 394 (8), 393 (35), 392 (25), 391 (100), 294 (17), 111 (5), 105 (7), 77 (9). Anal. calcd. for  $\text{C}_{29}\text{H}_{19}\text{ClN}_2\text{O}_5$  (510.10): C, 68.17; H, 3.75; N, 5.48. Found: C, 68.20; H, 3.77; N, 5.53%.

**5-[2-(4-Bromophenyl)-2-oxoethyl]-4-(4-chlorophenyl)-2-methyl-4,5-dihydrochromeno[4,3-*d*]pyrrolo[3,4-*b*]pyridine-1,3,6(2*H*)-trione (3d).**

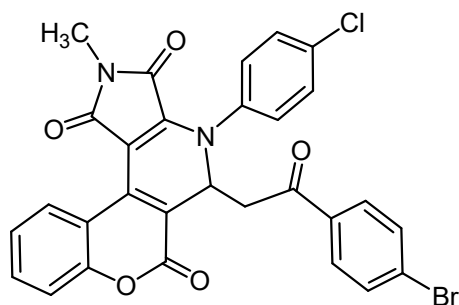

Light red solid, m.p = 238-239 °C (dec.), 0.44 g, yield: 75%. IR (KBr) ( $\nu_{\max}$ ,  $\text{cm}^{-1}$ ): 1701 (OCNCO and COO), 1678 (C=O), 1612, 1572 and 1445 (Ar), 1250 and 1212 (C-O), 1198 (C-N), 1086 (C-Cl), 1009 (C-Br), 761 (C-H)  $\text{cm}^{-1}$ .  $^1\text{H}$  NMR (300.13 MHz,  $\text{DMSO}-d_6$ ): 2.91 (3H, s, Me), 3.52 (1H, ABqd,  $^3J_{\text{HH}} = 16.9$  Hz,  $^2J_{\text{HH}} = 4.7$  Hz, CH of  $\text{CH}_2$ ), 3.87 (1H, ABqd,  $^3J_{\text{HH}} = 16.5$  Hz,  $^2J_{\text{HH}} = 6.1$  Hz, CH of  $\text{CH}_2$ ), 5.76 (1H, t,  $^3J_{\text{HH}} = 6.6$  Hz, CHN), 7.39 (2H, d,  $^3J_{\text{HH}} = 8.4$  Hz, 2CH of Ar), 7.45 (1H, t,  $^3J_{\text{HH}} = 7.0$  Hz,  $\text{CH}^{10}$  of coumarin), 7.46 (2H, d,  $^3J_{\text{HH}} = 7.6$  Hz, 2CH of Ar), 7.47 (1H, d,  $^3J_{\text{HH}} = 7.3$  Hz,  $\text{CH}^8$  of coumarin), 7.63 (1H, t,  $^3J_{\text{HH}} = 8.2$  Hz,  $\text{CH}^9$  of coumarin), 7.65 (2H, d,  $^3J_{\text{HH}} = 8.4$  Hz, CH of Ar), 7.81 (2H, d,  $^3J_{\text{HH}} = 7.7$  Hz, 2CH of Ar), 9.07 (1H, d,  $^3J_{\text{HH}} = 8.2$  Hz,  $\text{CH}^{11}$  of coumarin).  $^{13}\text{C}$  NMR (75.46 MHz,  $\text{DMSO}-d_6$ ): 23.92 (Me), 41.93 ( $\text{CH}_2$ ), 58.12 (CHN), 108.14 ( $\text{C}^{5a}$ ), 108.76 ( $\text{CH}^{11a}$ ), 115.24 ( $\text{CH}^{11c}$ ), 116.77 ( $\text{CH}^8$  of coumarin), 124.19 ( $\text{CH}^{10}$  of coumarin), 126.74 (C-Br and 2CH of Ar), 127.69 (2CH of Ar), 128.87 (C-Br), 128.99 (2CH of Ar), 130.17 (2CH of Ar), 131.75 ( $\text{CH}^{11}$  of coumarin), 132.00 ( $\text{CH}^9$  of coumarin), 135.44 ( $\text{C}_{\text{ipso}}\text{-CO}$ ), 136.78 ( $\text{C}_{\text{ipso}}\text{-N}$ ), 140.30 ( $\text{C}^{3a}$ ), 148.56 ( $\text{C}^{11b}$ ), 152.34 ( $\text{C}^{7a}$ ), 158.47 (COO), 162.00 (CON), 166.76 (CON), 196.14 (CO). MS (EI, 70 eV)  $m/z$  (%): 590 ( $\text{M}^{+2}$ , 1), 588 ( $\text{M}^+$ , 1), 394 (8), 393 (36), 392 (25), 391 (100), 75 (5). Anal. calcd. for  $\text{C}_{29}\text{H}_{18}\text{BrClN}_2\text{O}_5$  (588.01): C, 59.05; H, 3.08; N, 4.75. Found: C, 59.10; H, 3.10; N, 4.68%.

**5-[2-(4-Chlorophenyl)-2-oxoethyl]-2-methyl-4-(4-methylphenyl)-4,5-dihydrochromeno[4,3-*d*]pyrrolo[3,4-*b*]pyridine-1,3,6(2*H*)-trione (3e).**

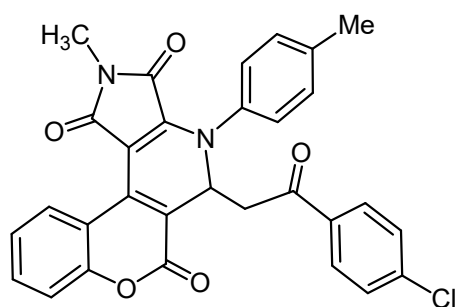

Light red solid, m.p = 225-226 °C (dec.), 0.46 g, yield: 89%. IR (KBr) ( $\nu_{\max}$ ,  $\text{cm}^{-1}$ ): 1702 (OCNCO and COO), 1684 (C=O), 1612, 1572 and 1458 (Ar), 1250 and 1180 (C-O), 1197 (C-N), 1012 (C-Cl), 761 (C-H)  $\text{cm}^{-1}$ .  $^1\text{H}$  NMR (300.13 MHz,  $\text{DMSO-}d_6$ ): 2.32 (3H, s, Me), 2.89 (3H, s, Me), 3.55 (1H, ABqd,  $^3J_{\text{HH}} = 16.1$  Hz,  $^2J_{\text{HH}} = 5.2$  Hz, CH of  $\text{CH}_2$ ), 3.81 (1H, ABqd,  $^3J_{\text{HH}} = 16.1$  Hz,  $^2J_{\text{HH}} = 6.1$  Hz, CH of  $\text{CH}_2$ ), 5.74 (1H, t,  $^3J_{\text{HH}} = 5.6$  Hz, CHN), 7.20 (2H, d,  $^3J_{\text{HH}} = 8.0$  Hz, 2CH of Ar), 7.37 (2H, d,  $^3J_{\text{HH}} = 8.0$  Hz, 2CH of Ar), 7.39 (1H, d,  $^3J_{\text{HH}} = 8.0$  Hz,  $\text{CH}^8$  of coumarin), 7.40 (1H, t,  $^3J_{\text{HH}} = 8.6$  Hz,  $\text{CH}^{10}$  of coumarin), 7.50 (2H, d,  $^3J_{\text{HH}} = 8.5$  Hz, 2CH of Ar), 7.63 (1H, t,  $^3J_{\text{HH}} = 8.7$  Hz,  $\text{CH}^9$  of coumarin), 7.89 (2H, d,  $^3J_{\text{HH}} = 8.5$  Hz, 2CH of Ar), 9.10 (1H, dd,  $^3J_{\text{HH}} = 8.6$  Hz,  $^2J_{\text{HH}} = 1.7$  Hz,  $\text{CH}^{11}$  of coumarin).  $^{13}\text{C}$  NMR (75.46 MHz,  $\text{DMSO-}d$ ): 20.64 (Me), 23.88 (Me), 42.06 ( $\text{CH}_2$ ), 58.61 (CHN), 107.17 ( $\text{C}^{5a}$ ), 107.55 ( $\text{CH}^{11a}$ ), 115.32 ( $\text{CH}^{11c}$ ), 116.75 ( $\text{CH}^8$  of coumarin), 124.14 ( $\text{CH}^{10}$  of coumarin), 124.78 (2CH of Ar), 128.78 ( $\text{CH}^{11}$  of coumarin), 128.98 (2CH of Ar), 129.56 (2CH of Ar), 130.07 (2CH of Ar), 131.94 ( $\text{CH}^9$  of coumarin), 135.22 ( $\text{C}_{\text{ipso}}\text{-Me}$ ), 136.87 ( $\text{C}_{\text{ipso}}\text{-CO}$ ), 137.45 ( $\text{C}_{\text{ipso}}\text{-N}$ ), 138.41 (C-Cl), 139.07 ( $\text{C}^{3a}$ ), 148.70 ( $\text{C}^{11b}$ ), 152.31 ( $\text{C}^{7a}$ ), 158.56 (COO), 161.86 (CON), 166.75 (CON), 195.86 (CO). MS (EI, 70 eV)  $m/z$  (%): 524 ( $\text{M}^+$ , 1), 455 (1), 372 (25), 371 (100), 294 (7), 139 (6), 91 (15), 65 (6). Anal. calcd. for  $\text{C}_{30}\text{H}_{21}\text{ClN}_2\text{O}_5$  (524.11): C, 68.64; H, 4.03; N, 5.34. Found: C, 68.70; H, 4.05; N, 5.38%.

**5-[2-(4-Bromophenyl)-2-oxoethyl]-4-(4-methoxyphenyl)-2-methyl-4,5-dihydrochromeno[4,3-*d*]pyrrolo[3,4-*b*]pyridine-1,3,6(2*H*)-trione (3f).**

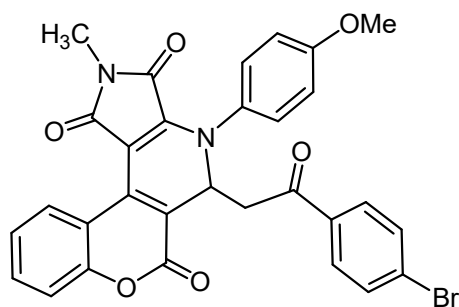

Light red solid, m.p = 190-191 °C (dec.), 0.54 g, yield: 92%. IR (KBr) ( $\nu_{\max}$ ,  $\text{cm}^{-1}$ ): 1710 (OCNCO and COO), 1681 (C=O), 1613, 1574 and 1459 (Ar), 1240, 1200 and 1099 (C-O), 1177 (C-N), 1007 (C-Br), 760 (C-H)  $\text{cm}^{-1}$ .  $^1\text{H}$  NMR (300.13 MHz,  $\text{DMSO-}d_6$ ): 2.87 (3H, s, Me), 3.76 (3H, s, OMe), 3.49 (1H, ABq,  $^3J_{\text{HH}} = 17.7$  Hz, CH of  $\text{CH}_2$ ), 3.81 (1H, ABq,  $^3J_{\text{HH}} = 17.7$  Hz, CH of  $\text{CH}_2$ ), 5.70 (1H, bs, CHN), 6.92 (2H, d,  $^3J_{\text{HH}} = 8.4$  Hz, 2CH of Ar), 7.36 (1H, d,  $^3J_{\text{HH}} = 8.3$  Hz,  $\text{CH}^8$  of coumarin), 7.38 (1H, d,  $^3J_{\text{HH}} = 8.3$  Hz,  $\text{CH}^{10}$  of coumarin), 7.45 (2H, d,  $^3J_{\text{HH}} = 8.0$  Hz, 2CH of Ar), 7.61 (1H, t,  $^3J_{\text{HH}} = 7.5$  Hz,  $\text{CH}^9$  of coumarin), 7.63 (2H, d,  $^3J_{\text{HH}} = 8.0$  Hz, 2CH of Ar), 7.79 (2H, d,  $^3J_{\text{HH}} = 8.3$  Hz, 2CH of Ar), 9.12 (1H, d,  $^3J_{\text{HH}} = 8.0$  Hz,  $\text{CH}^{11}$  of coumarin).  $^{13}\text{C}$  NMR (75.46 MHz,  $\text{DMSO-}d$ ): 23.86 (Me), 42.09 ( $\text{CH}_2$ ), 55.50 (OMe), 58.90 (CHN), 105.85 ( $\text{C}^{5a}$ ), 106.99 ( $\text{CH}^{11a}$ ), 114.24 (2CH of Ar), 115.41 ( $\text{CH}^{11a}$ ), 116.73 ( $\text{CH}^8$  of coumarin), 124.11 ( $\text{CH}^{10}$  of coumarin), 126.67 (2CH of Ar), 127.60 (C-Br), 128.93 ( $\text{C}_{\text{ipso-N}}$ ), 130.14 (2CH of Ar), 131.72 (2CH of Ar), 131.89 ( $\text{CH}^{11}$  of coumarin), 134.42 ( $\text{CH}^9$  of coumarin), 135.55 ( $\text{C}_{\text{ipso-CO}}$ ), 137.02 ( $\text{C}^{3a}$ ), 148.77 ( $\text{C}^{11b}$ ), 152.30 ( $\text{C}^{7a}$ ), 158.60 (COO), 158.84 ( $\text{C}_{\text{ipso-OMe}}$ ), 161.82 (CON), 166.75 (CON), 196.04 (CO). MS (EI, 70 eV)  $m/z$  (%): 586 ( $\text{M}^{+1}$ , 1), 584 ( $\text{M}^+$ , 1), 455 (7), 388 (14), 387 (59), 328 (8), 309 (6), 294 (10), 293 (18), 92 (11), 91 (100), 77 (5), 65 (7). Anal. calcd. for  $\text{C}_{30}\text{H}_{21}\text{BrN}_2\text{O}_6$  (584.06): C, 61.55; H, 3.62; N, 4.79. Found: C, 61.50; H, 3.60; N, 4.86%.

**5-[2-(4-Chlorophenyl)-2-oxoethyl]-4-(4-methoxyphenyl)-2-methyl-4,5-dihydrochromeno[4,3-*d*]pyrrolo[3,4-*b*]pyridine-1,3,6(2*H*)-trione (3g)**



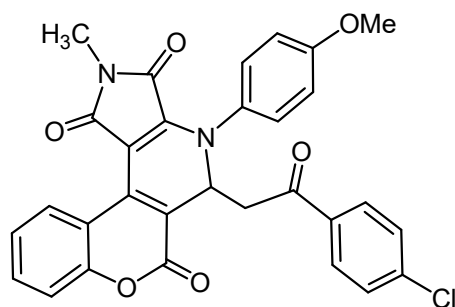

Light red solid, m.p = 199-200 °C (dec.), 0.48 g, yield: 90%. IR (KBr) ( $\nu_{\max}$ ,  $\text{cm}^{-1}$ ): 1702 (OCNCO and COO), 1684 (C=O), 1612, 1572 and 1458 (Ar), 1251, 1210 and 1104 (C-O), 1197 (C-N), 1013 (C-Cl), 761 (C-H)  $\text{cm}^{-1}$ .  $^1\text{H}$  NMR (300.13 MHz,  $\text{DMSO-}d_6$ ): 2.89 (3H, s, Me), 3.78 (3H, s, OMe), 3.50 (1H, ABqd,  $^3J_{\text{HH}} = 16.1$  Hz,  $^2J_{\text{HH}} = 5.1$  Hz, CH of  $\text{CH}_2$ ), 3.82 (1H, ABqd,  $^3J_{\text{HH}} = 16.1$  Hz,  $^2J_{\text{HH}} = 6.0$  Hz, CH of  $\text{CH}_2$ ), 5.72 (1H, t,  $^3J_{\text{HH}} = 6.0$  Hz, CHN), 6.92 (2H, d,  $^3J_{\text{HH}} = 8.4$  Hz, 2CH of Ar), 7.37 (1H, d,  $^3J_{\text{HH}} = 8.0$  Hz,  $\text{CH}^8$  of coumarin), 7.39 (1H, t,  $^3J_{\text{HH}} = 8.0$  Hz,  $\text{CH}^{10}$  of coumarin), 7.45 (2H, d,  $^3J_{\text{HH}} = 8.2$  Hz, 2CH of Ar), 7.50 (2H, d,  $^3J_{\text{HH}} = 8.2$  Hz, 2CH of Ar), 7.62 (1H, t,  $^3J_{\text{HH}} = 7.6$  Hz,  $\text{CH}^9$  of coumarin), 7.88 (2H, d,  $^3J_{\text{HH}} = 8.3$  Hz, 2CH of Ar), 9.14 (1H, d,  $^3J_{\text{HH}} = 8.1$  Hz,  $\text{CH}^{11}$  of coumarin).  $^{13}\text{C}$  NMR (75.46 MHz,  $\text{DMSO-}d_6$ ): 23.85 (Me), 42.11 ( $\text{CH}_2$ ), 55.49 (OMe), 58.88 (CHN), 105.86 ( $\text{C}^{5a}$ ), 107.01 ( $\text{CH}^{11a}$ ), 114.24 (2CH of Ar), 115.42 ( $\text{CH}^{11c}$ ), 116.73 ( $\text{CH}^8$  of coumarin), 124.11 ( $\text{CH}^{10}$  of coumarin), 126.67 (2CH of Ar), 128.76 (2CH of Ar), 128.93 ( $\text{C}_{\text{ipso}}\text{-CO}$ ), 130.06 (2CH of Ar), 131.88 ( $\text{CH}^{11}$  of coumarin), 134.42 ( $\text{CH}^9$  of coumarin), 135.22 ( $\text{C}_{\text{ipso}}\text{-CO}$ ), 137.01 (C-Cl), 138.39 ( $\text{C}^{3a}$ ), 148.77 ( $\text{C}^{11b}$ ), 152.31 ( $\text{C}^{7a}$ ), 158.60 (COO), 158.83 ( $\text{C}_{\text{ipso}}\text{-OMe}$ ), 161.84 (CON), 166.76 (CON), 195.83 (CO). MS (EI, 70 eV)  $m/z$  (%): 540 ( $\text{M}^+$ , 1), 388 (28), 387 (100), 344 (5), 294 (13), 247 (4), 139 (8), 111 (6), 77 (4). Anal. calcd. for  $\text{C}_{30}\text{H}_{21}\text{ClN}_2\text{O}_6$  (540.11): C, 66.61; H, 3.91; N, 5.18. Found: C, 66.68; H, 3.89; N, 5.13%.

**2-Benzyl-5-(2-oxo-2-phenylethyl)-4-phenyl-4,5-dihydrochromeno[4,3-*d*]pyrrolo[3,4-*b*]pyridine-1,3,6(2*H*)-trione (3h).**

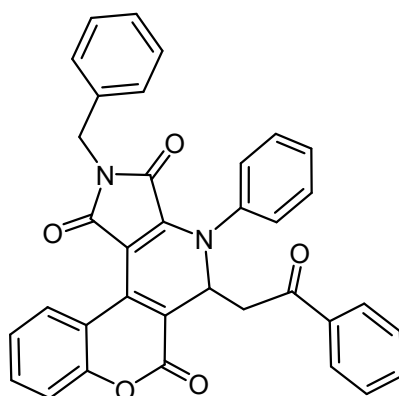

Light red solid, m.p = 210-212 °C (dec.), 0.30 g, yield: 55%. IR (KBr) ( $\nu_{\max}$ ,  $\text{cm}^{-1}$ ): 1700 (OCNCO and COO), 1637 (C=O), 1607, 1568 and 1492 (Ar), 1248, 1200 and 1092 (C-O), 1197 (C-N), 754 (C-H)  $\text{cm}^{-1}$ .  $^1\text{H}$  NMR (300.13 MHz,  $\text{CDCl}_3$ ): 3.28 (1H, ABqd,  $^3J_{\text{HH}} = 14.7$  Hz,  $^2J_{\text{HH}} = 4.9$  Hz, CH of  $\text{CH}_2$ ), 3.60 (1H, ABqd,  $^3J_{\text{HH}} = 14.7$  Hz,  $^2J_{\text{HH}} = 6.2$  Hz, CH of  $\text{CH}_2$ ), 4.67 (1H, t,  $^3J_{\text{HH}} = 4.2$  Hz, CHN), 5.91 (2H, ABq,  $^2J_{\text{HH}} = 7.7$  Hz, 2CH of  $\text{CH}_2$ ). 7.24-7.43 (13H, m, 10H of Ph and 3H of coumarin), 7.56 (2H, d,  $^3J_{\text{HH}} = 7.6$  Hz, CH of Ph), 7.51 (1H, t,  $^3J_{\text{HH}} = 7.6$  Hz, CH of Ph), 7.77 (2H, d,  $^3J_{\text{HH}} = 7.5$  Hz, CH of Ph), 9.09 (1H, d,  $^3J_{\text{HH}} = 7.8$  Hz,  $\text{CH}^{11}$  of coumarin).  $^{13}\text{C}$  NMR (75.46 MHz,  $\text{CDCl}_3$ ): 41.24 ( $\text{CH}_2$ ), 41.83 ( $\text{CH}_2$ ), 60.24 (CHN), 105.06 ( $\text{C}^{5\text{a}}$ ), 108.45 ( $\text{CH}^{11\text{a}}$ ), 115.29 ( $\text{CH}^{11\text{c}}$ ), 116.84 ( $\text{CH}^8$  of coumarin), 124.35 ( $\text{CH}^{10}$  of coumarin), 125.72 (2CH of Ph), 127.88 (CH of Ph), 128.17 (CH of Ar), 128.68 (2CH of Ph), 128.69 (2CH of Ph), 129.42 ( $\text{CH}^{11}$  of coumarin), 131.88 ( $\text{CH}^9$  of coumarin), 133.41 (CH of Ph), 136.08 ( $\text{C}_{\text{ipso}}\text{-CO}$ ), 136.72 ( $\text{C}_{\text{ipso}}\text{-Ph}$ ), 139.11 ( $\text{C}^{3\text{a}}$ ), 140.56 ( $\text{C}_{\text{ipso}}\text{-Bn}$ ), 149.34 ( $\text{C}^{11\text{b}}$ ), 152.77 ( $\text{C}^{7\text{a}}$ ), 159.54 (COO), 166.11 (CON), 170.16 (CON), 196.80 (CO). MS (EI, 70 eV)  $m/z$  (%): 552 ( $\text{M}^+$ , 5), 459 (5), 433 (100), 417 (5), 370 (9), 326 (12), 107 (60), 91 (97), 77 (83), 65 (19). Anal. calcd. for  $\text{C}_{35}\text{H}_{24}\text{N}_2\text{O}_5$  (552.17): C, 76.08; H, 4.38; N, 5.07. Found: C, 76.04; H, 4.40; N, 5.09%

**5-(4-Anilino-1-methyl-2,5-dioxo-2,5-dihydro-1H-pyrrol-3-yl)-2-methyl-4-phenyl-4,5-dihydrochromeno[4,3-d]pyrrolo[3,4-b]pyridine-1,3,6(2H)-trione (3'a).**

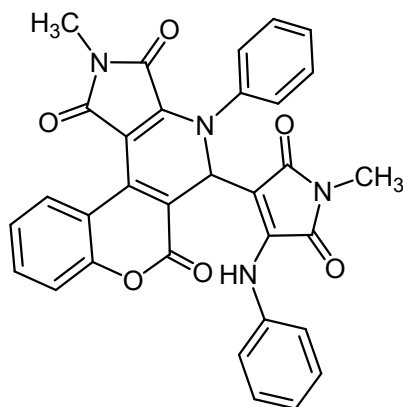

Light red solid, m.p = 284-285°C (dec.), 0.44 g, yield: 80%. IR (KBr) ( $\nu_{\max}$ ,  $\text{cm}^{-1}$ ): 3237 (NH), 1703 (OCNCO and COO), 1610, 1571 and 1449 (Ar), 1242 and 1098 (C-O), 1197 (C-N), 763 (C-H)  $\text{cm}^{-1}$ .  $^1\text{H}$  NMR (300.13 MHz,  $\text{DMSO-}d_6$ ): 2.81 (3H, s, Me), 2.86 (3H, s, Me), 6.64 (2H, d,  $^3J_{\text{HH}} = 6.6$  Hz, 2CH of Ph), 7.04 (1H, t,  $^3J_{\text{HH}} = 7.0$  Hz, CH of Ph), 7.06 (2H, t,  $^3J_{\text{HH}} = 7.0$  Hz, 2CH of Ph), 7.27 (1H, d,  $^3J_{\text{HH}} = 8.5$  Hz,  $\text{CH}^8$  of coumarin), 7.32 (2H, t,  $^3J_{\text{HH}} = 7.0$  Hz, 2CH of Ph), 7.33 (1H, t,  $^3J_{\text{HH}} = 7.3$  Hz,  $\text{CH}^{10}$  of coumarin), 7.50 (1H, t,  $^3J_{\text{HH}} = 7.0$  Hz, CH of Ph), 7.52 (2H, d,  $^3J_{\text{HH}} = 7.0$  Hz, 2CH of Ph), 7.55 (1H, t,  $^3J_{\text{HH}} = 7.3$  Hz,  $\text{CH}^9$  of coumarin), 9.29 (1H, d,  $^3J_{\text{HH}} = 8.2$  Hz,  $\text{CH}^{11}$  of coumarin), 9.56 (1H, bs, NH).  $^{13}\text{C}$  NMR (75.45 MHz,  $\text{DMSO-}d_6$ ): 23.60 (Me), 23.70 (Me), 55.84 (CHN), 97.81 ( $\text{C}^3$ ), 98.94 ( $\text{C}^{5a}$ ), 107.80 ( $\text{C}^{11a}$ ), 115.55 ( $\text{C}^{11c}$ ), 116.43 ( $\text{CH}^8$  of coumarin), 123.83 ( $\text{CH}^{10}$  of coumarin), 124.26 (2CH of Ph), 125.34 (CH of Ph), 127.61 (2CH of Ph), 128.38 (2CH of Ph), 129.06 (CH of Ph), 129.35 (2CH of Ph), 129.66 ( $\text{CH}^{11}$  of coumarin), 131.77 ( $\text{CH}^9$  of coumarin), 138.31 ( $\text{C}_{\text{ipso-Ph}}$ ), 138.86 ( $\text{C}^4$ ), 140.22 ( $\text{C}_{\text{ipso-Ph}}$ ), 141.54 ( $\text{C}^{3a}$ ), 150.16 ( $\text{C}^{11b}$ ), 152.12 ( $\text{C}^{7a}$ ), 158.56 (COO), 161.45 (CON), 166.44 (CON), 166.88 (CON), 171.46 (CON). MS (EI, 70 eV)  $m/z$  (%): 559 ( $\text{M}^+$ , 15), 558 ( $\text{M}^+$ , 44), 481 (9), 472 (6), 467 (29), 466 (100), 381 (13), 369 (6), 358 (23), 357 (88), 300 (7), 281 (11), 279 (8), 270 (7), 180 (27), 144 (11), 105 (7), 104 (6), 93 (60), 78 (6), 77 (70). Anal. calcd. for  $\text{C}_{32}\text{H}_{22}\text{N}_4\text{O}_6$  (558.15): C, 68.81; H, 3.97; N, 10.03. Found: C, 68.85; H, 4.00; N, 10.10%.

**2-Methyl-5-{1-methyl-4-[(4-methylphenyl)amino]-2,5-dioxo-2,5-dihydro-1H-pyrrol-3-yl}-4-(4-methylphenyl)-4,5-dihydrochromeno[4,3-d]pyrrolo[3,4-b]pyridine-1,3,6(2H)-trione (3'b).**

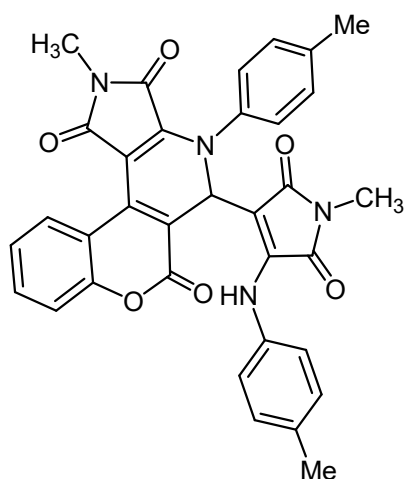

Light red solid, m.p = 246-247 °C (dec.), 0.45 g, yield: 78%. IR (KBr) ( $\nu_{\max}$ ,  $\text{cm}^{-1}$ ): 3310 (NH), 1695 (OCNCO and COO), 1610, 1573 and 1439 (Ar), 1249 and 1100 (C-O), 1199 (C-N), 749 (C-H)  $\text{cm}^{-1}$ .  $^1\text{H}$  NMR (300.13 MHz,  $\text{DMSO}-d_6$ ): 2.20 (3H, s, Me), 2.038 (3H, s, Me), 2.80 (3H, s, Me), 2.84 (3H, s, Me), 5.76 (1H, s, CHN), 6.67 (2H, d,  $^3J_{\text{HH}} = 7.8$  Hz, 2CH of Ar), 6.83 (2H, d,  $^3J_{\text{HH}} = 7.8$  Hz, 2CH of Ar), 7.15 (2H, d,  $^3J_{\text{HH}} = 8.0$  Hz, 2CH of Ar), 7.26 (2H, d,  $^3J_{\text{HH}} = 8.0$  Hz, 2CH of Ar), 7.27 (1H, d,  $^3J_{\text{HH}} = 8.2$  Hz, CH<sup>8</sup> of coumarin), 7.34 (1H, t,  $^3J_{\text{HH}} = 7.8$  Hz, CH<sup>10</sup> of coumarin), 7.55 (1H, t,  $^3J_{\text{HH}} = 7.8$  Hz, CH<sup>9</sup> of coumarin), 9.30 (1H, d,  $^3J_{\text{HH}} = 8.2$  Hz, CH<sup>11</sup> of coumarin), 9.53 (1H, bs, NH).  $^{13}\text{C}$  NMR (75.45 MHz,  $\text{DMSO}-d_6$ ): 20.59 (Me), 20.82 (Me), 23.57 (Me), 23.67 (Me), 55.98 (CHN), 97.33 (C<sup>3</sup>), 98.16 (C<sup>5a</sup>), 107.80 (C<sup>11a</sup>), 115.60 (C<sup>11c</sup>), 116.43 (CH<sup>8</sup> of coumarin), 123.81 (CH<sup>10</sup> of coumarin), 124.40 (2CH of Ph), 127.38 (2CH of Ar), 128.79 (2CH of Ar), 129.70 (2CH of Ar and CH<sup>11</sup> of coumarin), 131.72 (CH<sup>9</sup> of coumarin), 134.74 (C<sub>ipso</sub>-Me), 135.53 (C<sub>ipso</sub>-Me), 137.68 (C<sub>ipso</sub>-Ar), 138.62 (C<sub>ipso</sub>-Ar), 139 (C<sup>4</sup>), 141.69 (C<sup>3a</sup>), 150.16 (C<sup>11b</sup>), 152.14 (C<sup>7a</sup>), 158.57 (COO), 161.41 (CON), 166.49 (CON), 166.85 (CON), 171.49 (CON). MS (EI, 70 eV)  $m/z$  (%): 586 (M<sup>+</sup>, 17), 481 (12), 480 (39), 395 (8), 386 (6), 385 (5), 293 (4), 217 (13), 216 (75), 208 (6), 159 (14), 158 (83), 132 (6), 131 (40), 130 (43), 129 (8), 119 (7), 118 (6), 116 (8), 107 (74), 106 (18), 104 (9), 103 (15), 102 (6), 92 (12), 91 (100), 90 (20), 89 (21), 88 (6), 79 (9), 78 (12), 77 (25), 76 (7), 68 (7), 66 (7), 65 (74), 64 (12), 63 (20), 62 (7), 58 (18), 57 (12), 56 (10), 52 (12), 51 (19), 50 (10). Anal. calcd. for C<sub>34</sub>H<sub>26</sub>N<sub>4</sub>O<sub>6</sub> (586.19): C, 69.62; H, 4.47; N, 9.55. Found: C, 69.68; H, 4.45; N, 9.51%.

**4-(4-Methoxyphenyl)-5-{4-[(4-methoxyphenyl)amino]-1-methyl-2,5-dioxo-2,5-dihydro-1H-pyrrol-3-yl}-2-methyl-4,5-dihydrochromeno[4,3-*d*]pyrrolo[3,4-*b*]pyridine-1,3,6(2*H*)-trione (3'c).**

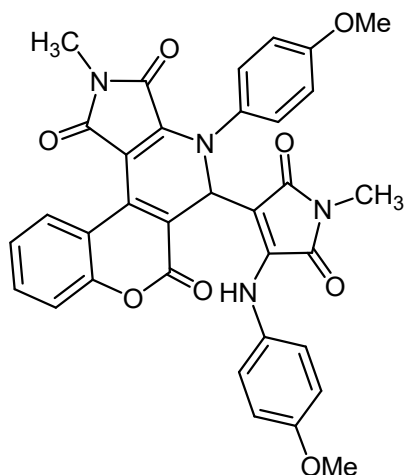

Light red solid, m.p = 244-245 °C (dec.), 0.51 g, yield: 82%. IR (KBr) ( $\nu_{\max}$ ,  $\text{cm}^{-1}$ ): 3097 (NH), 1698 (OCNCO and COO), 1610, 1574 and 1441 (Ar), 1248, 1172 and 1028 (C-O), 1196 (C-N), 736 (C-H)  $\text{cm}^{-1}$ .  $^1\text{H}$  NMR (300.13 MHz,  $\text{DMSO-}d_6$ ): 2.81 (3H, s, Me), 20.85 (3H, s, Me), 3.69 (3H, s, OMe), 3.83 (3H, s, OMe), 5.64 (1H, s, CHN), 6.58 (4H, m, 4CH of Ar), 7.01 (2H, dd,  $^3J_{\text{HH}} = 8.8$  Hz,  $^2J_{\text{HH}} = 1.0$  Hz, 2CH of Ar), 7.20 (2H, dd,  $^3J_{\text{HH}} = 8.8$  Hz,  $^2J_{\text{HH}} = 1.0$  Hz, 2CH of Ar), 7.28 (1H, d,  $^3J_{\text{HH}} = 8.2$  Hz, CH<sup>8</sup> of coumarin), 7.33 (1H, t,  $^3J_{\text{HH}} = 7.8$  Hz, CH<sup>10</sup> of coumarin), 7.56 (1H, t,  $^3J_{\text{HH}} = 7.8$  Hz, CH<sup>9</sup> of coumarin), 9.32 (1H, d,  $^3J_{\text{HH}} = 8.2$  Hz, CH<sup>11</sup> of coumarin), 9.49 (1H, bs, NH).  $^{13}\text{C}$  NMR (75.45 MHz,  $\text{DMSO-}d_6$ ): 20.54 (Me), 20.64 (Me), 55.17 (OMe), 55.53 (OMe), 56.11 (CHN), 96.75 (C<sup>3</sup>), 96.93 (C<sup>5a</sup>), 107.61 (C<sup>11a</sup>), 113.41 (2CH of Ar), 114.43 (2CH of Ar), 115.57 (C<sup>11c</sup>), 116.38 (CH<sup>8</sup> of coumarin), 123.75 (CH<sup>10</sup> of coumarin), 126.30 (2CH of Ar), 129.05 (2CH of Ar), 129.68 (CH<sup>11</sup> of coumarin), 130.58 (C<sub>ipso</sub>-Ar), 131.68 (CH<sup>9</sup> of coumarin), 132.87 (C<sub>ipso</sub>-Ar), 139 (C<sup>4</sup>), 142.17 (C<sup>3a</sup>), 150.40 (C<sup>11b</sup>), 152.11 (C<sup>7a</sup>), 157.03 (C<sub>ipso</sub>-OMe), 158.57 (COO), 159.53 (C<sub>ipso</sub>-OMe), 161.37 (CON), 166.56 (CON), 166.81 (CON), 171.62 (CON). MS (EI, 70 eV)  $m/z$  (%): 496 (4), 388 (17), 387 (59), 368 (5), 294 (5), 233 (13), 232 (100), 217 (29), 160 (8), 147 (15), 146 (21), 132 (18), 123 (11), 108 (15), 97 (9), 95 (6), 92 (8), 85 (7), 83 (9), 82 (8), 77 (14), 71 (9), 69 (13), 57 (16), 55 (12). Anal. calcd. for  $\text{C}_{34}\text{H}_{26}\text{N}_4\text{O}_8$  (618.18): C, 66.02; H, 4.24; N, 9.06. Found: C, 65.95; H, 4.27; N, 9.10%.

**4-(4-Chlorophenyl)-5-(4-((4-chlorophenyl)amino)-1-methyl-2,5-dioxo-2,5-dihydro-1H-pyrrol-3-yl)-2-methyl-4,5-dihydrochromeno[4,3-d]pyrrolo[3,4-b]pyridine-1,3,6(2H)-trione (3'd).**

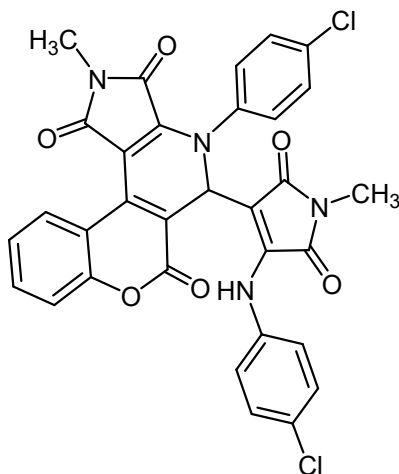

Light red solid, m.p = 245-246 °C (dec.), 0.25 g, yield: 41%. IR (KBr) ( $\nu_{\max}$ ,  $\text{cm}^{-1}$ ): 3126 (NH), 1700 (OCNCO and COO, 1610, 1573 and 1508 (Ar), 1246, 1173 (C-O), 1092 (C-N), 762 (C-H), 1028 (C-Cl)  $\text{cm}^{-1}$ .  $^1\text{H}$  NMR (300.13 MHz,  $\text{CDCl}_3$ ): 2.97 (3H, s, Me), 3.05 (3H, s, Me), 5.88 (1H, s, CHN), 6.88 (2H, d,  $^3J_{\text{HH}} = 8.6$  Hz, 2CH of Ar), 7.10 (2H, d,  $^3J_{\text{HH}} = 8.6$  Hz, 2CH of Ar), 7.18 (2H, dd,  $^3J_{\text{HH}} = 8.0$  Hz), 7.29 (1H, t,  $^3J_{\text{HH}} = 8.0$  Hz, CH<sup>9</sup> of coumarin), 7.30 (1H, d,  $^3J_{\text{HH}} = 8.0$  Hz, CH<sup>8</sup> of coumarin), 7.55 (1H, dt,  $^3J_{\text{HH}} = 7.2$  Hz,  $^4J_{\text{HH}} = 1.5$  Hz, CH<sup>10</sup> of coumarin), 7.78 (1H, bs, NH), 9.40 (1H, dd,  $^3J_{\text{HH}} = 8.2$  Hz,  $^4J_{\text{HH}} = 1.5$  Hz, CH<sup>11</sup> of coumarin). MS (EI, 70 eV)  $m/z$  (%): 627 (10), 433 (52), 392 (5), 325 (5), 280 (5), 236 (52), 178 (94), 151 (52), 127 (57), 91 (73), 57 (100). Anal. calcd.  $\text{C}_{32}\text{H}_{20}\text{Cl}_2\text{N}_4\text{O}_6$  (626.08): C, 61.26; H, 3.21; N, 8.93. Found: C, 61.24; H, 3.20; N, 8.96%.

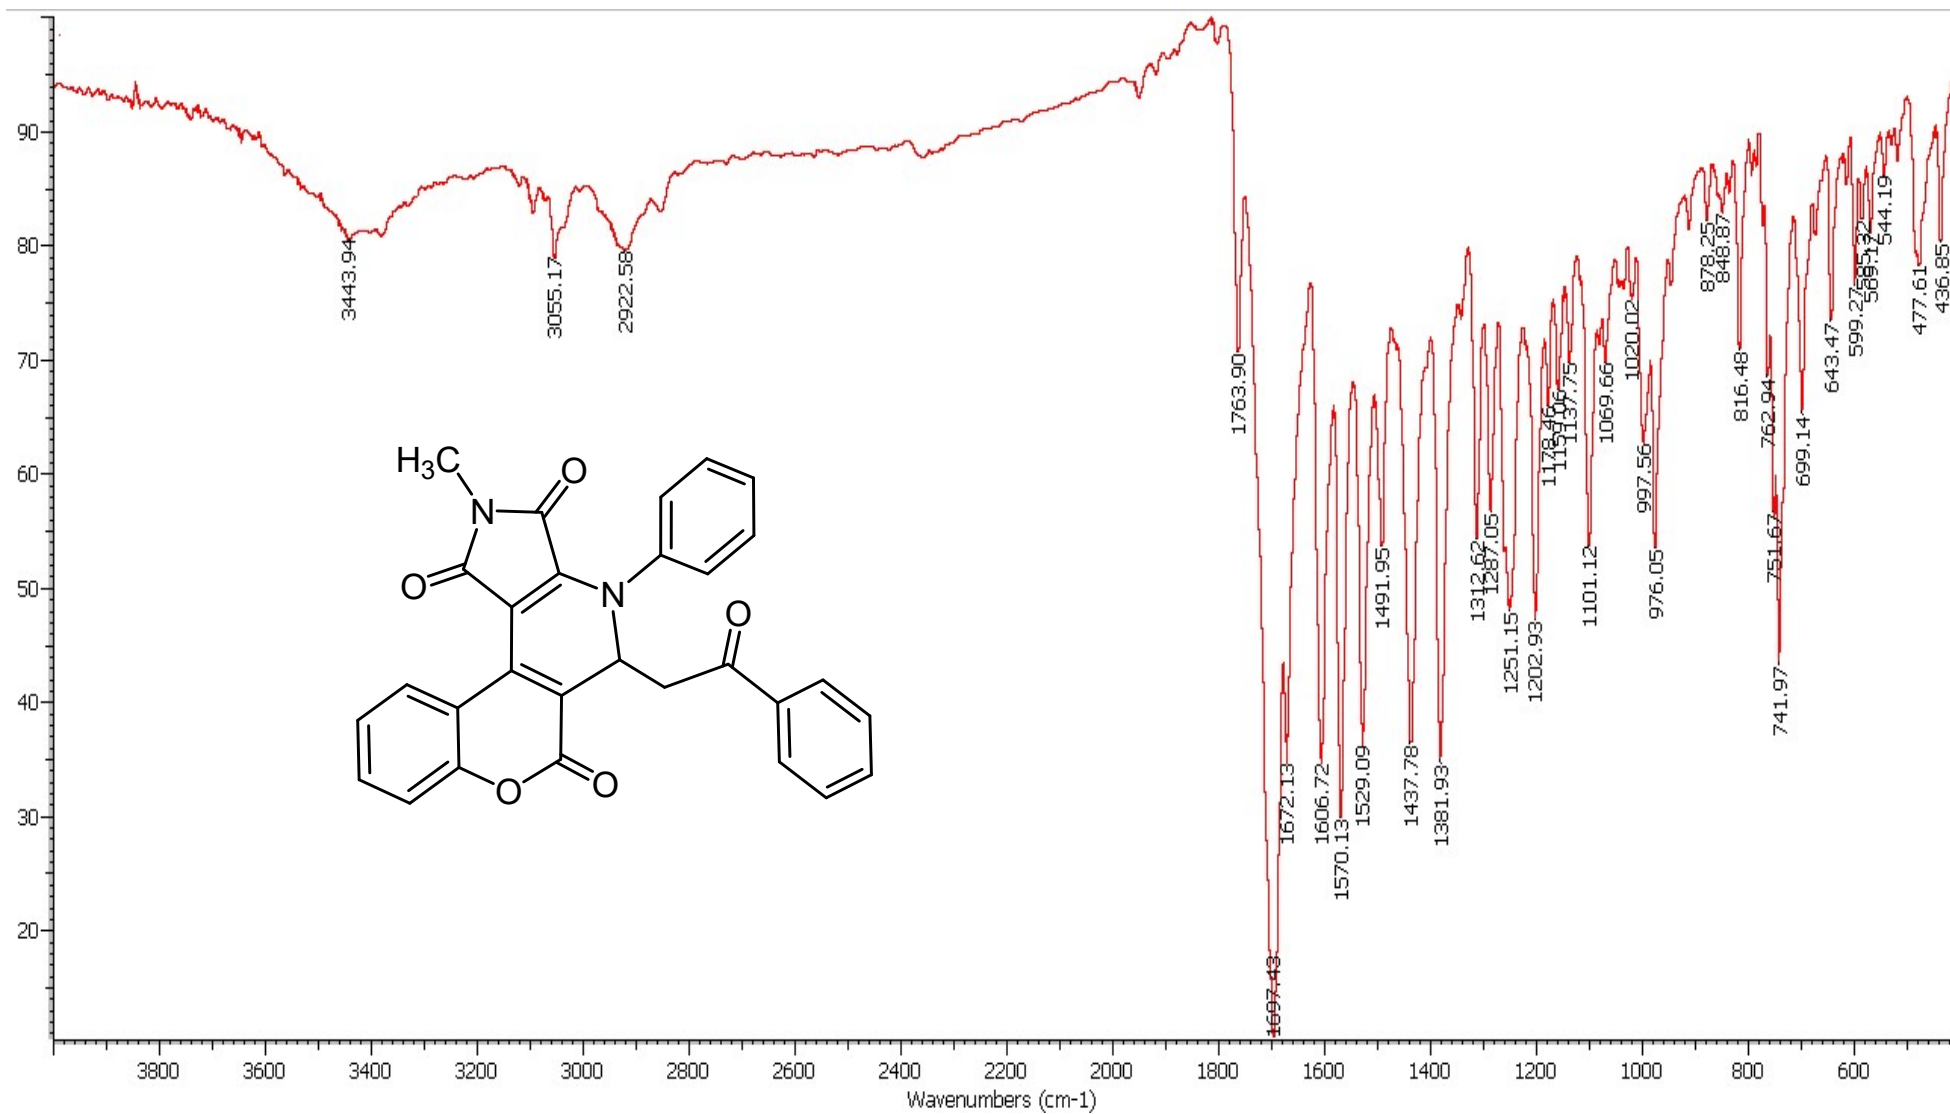

IR spectrum of 3a

Rostampoor.3.fid  
D296  
1H NMR

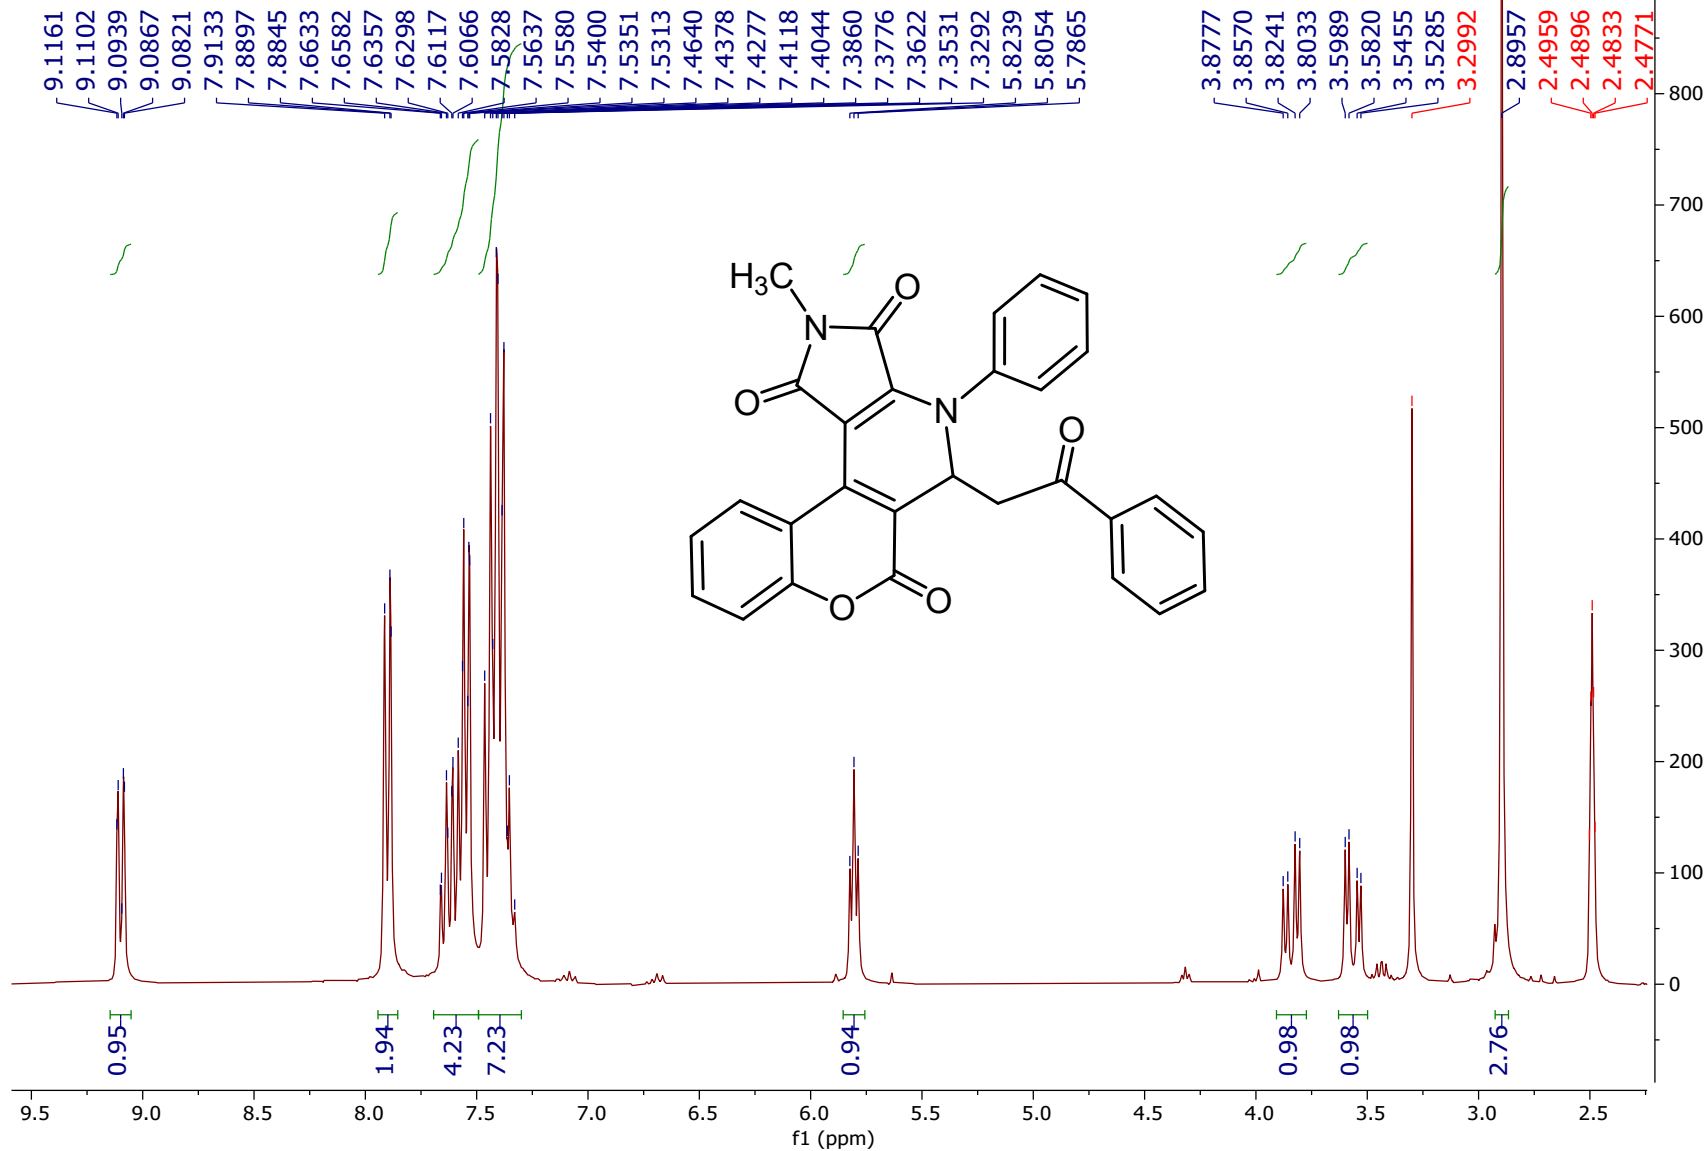

<sup>1</sup>H NMR Spectrum of 3a



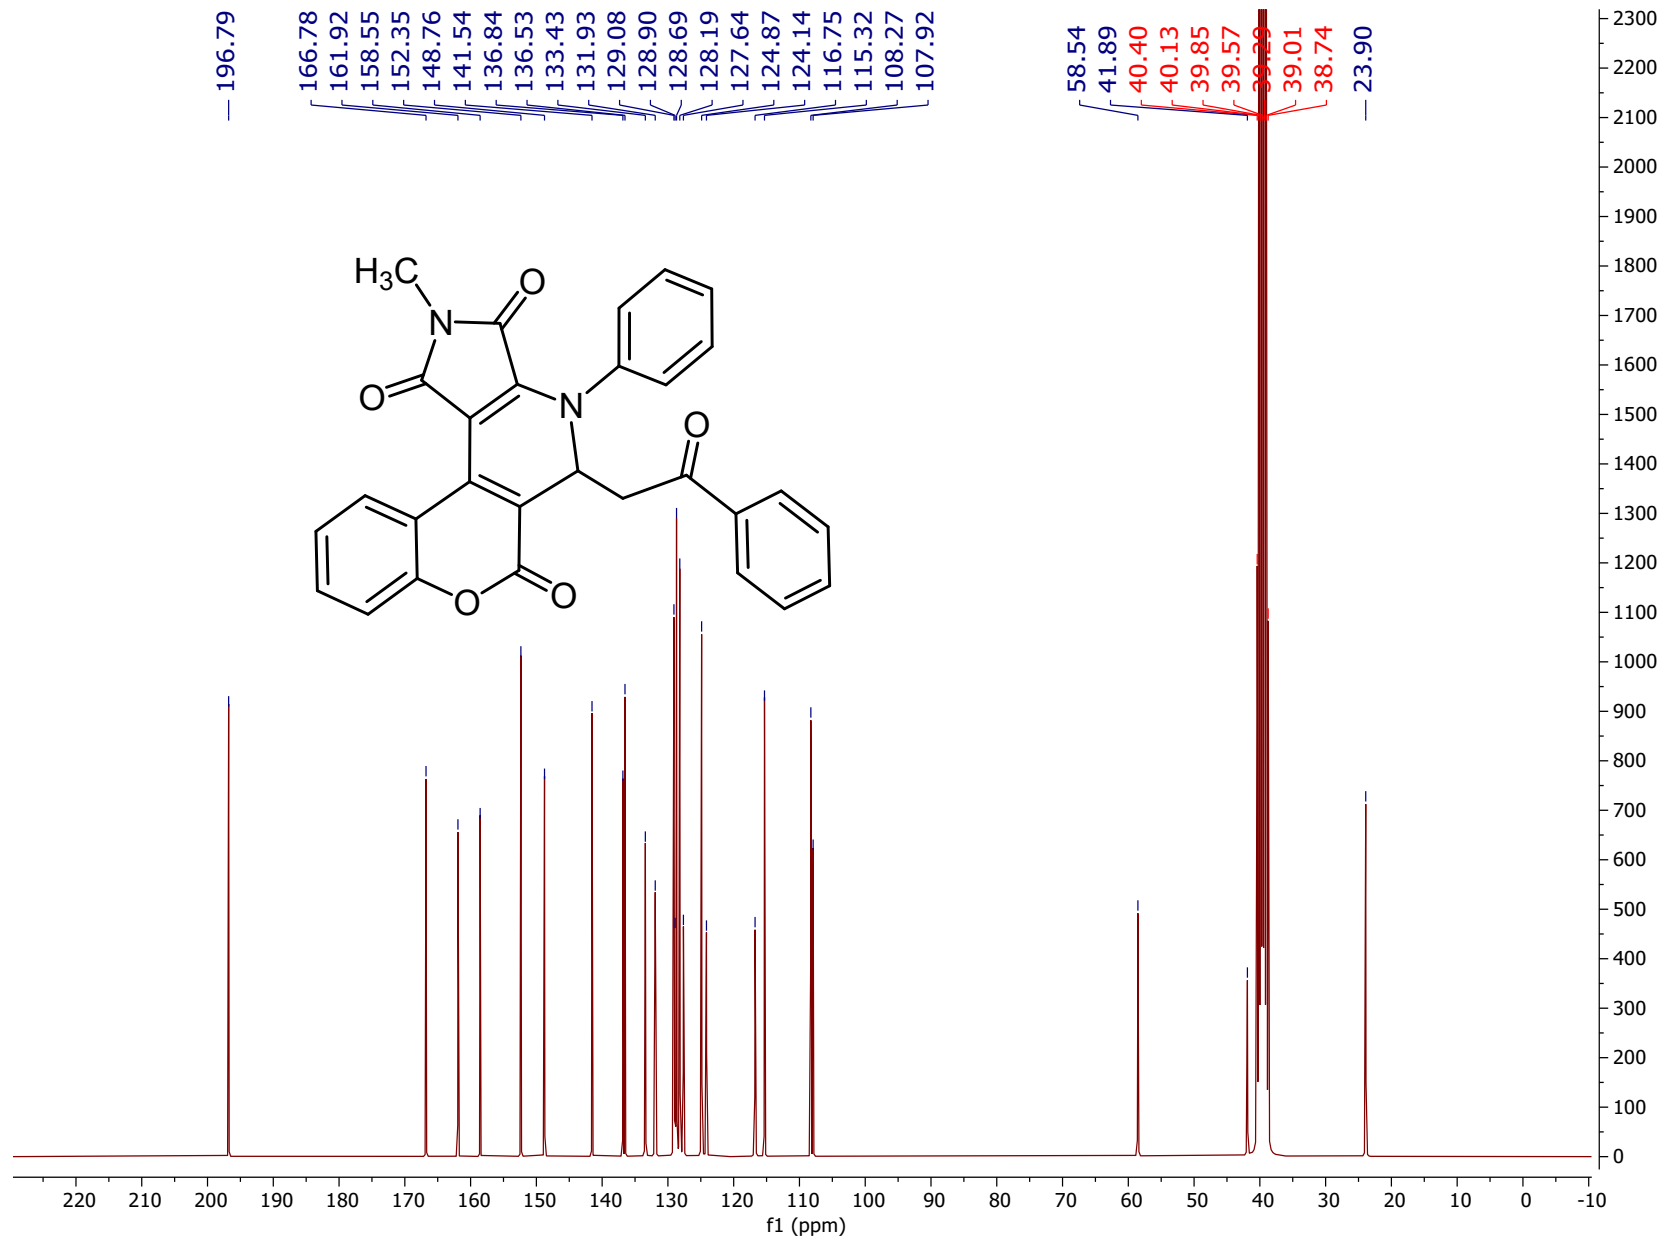

<sup>13</sup>C NMR Spectrum of 3a  
S17

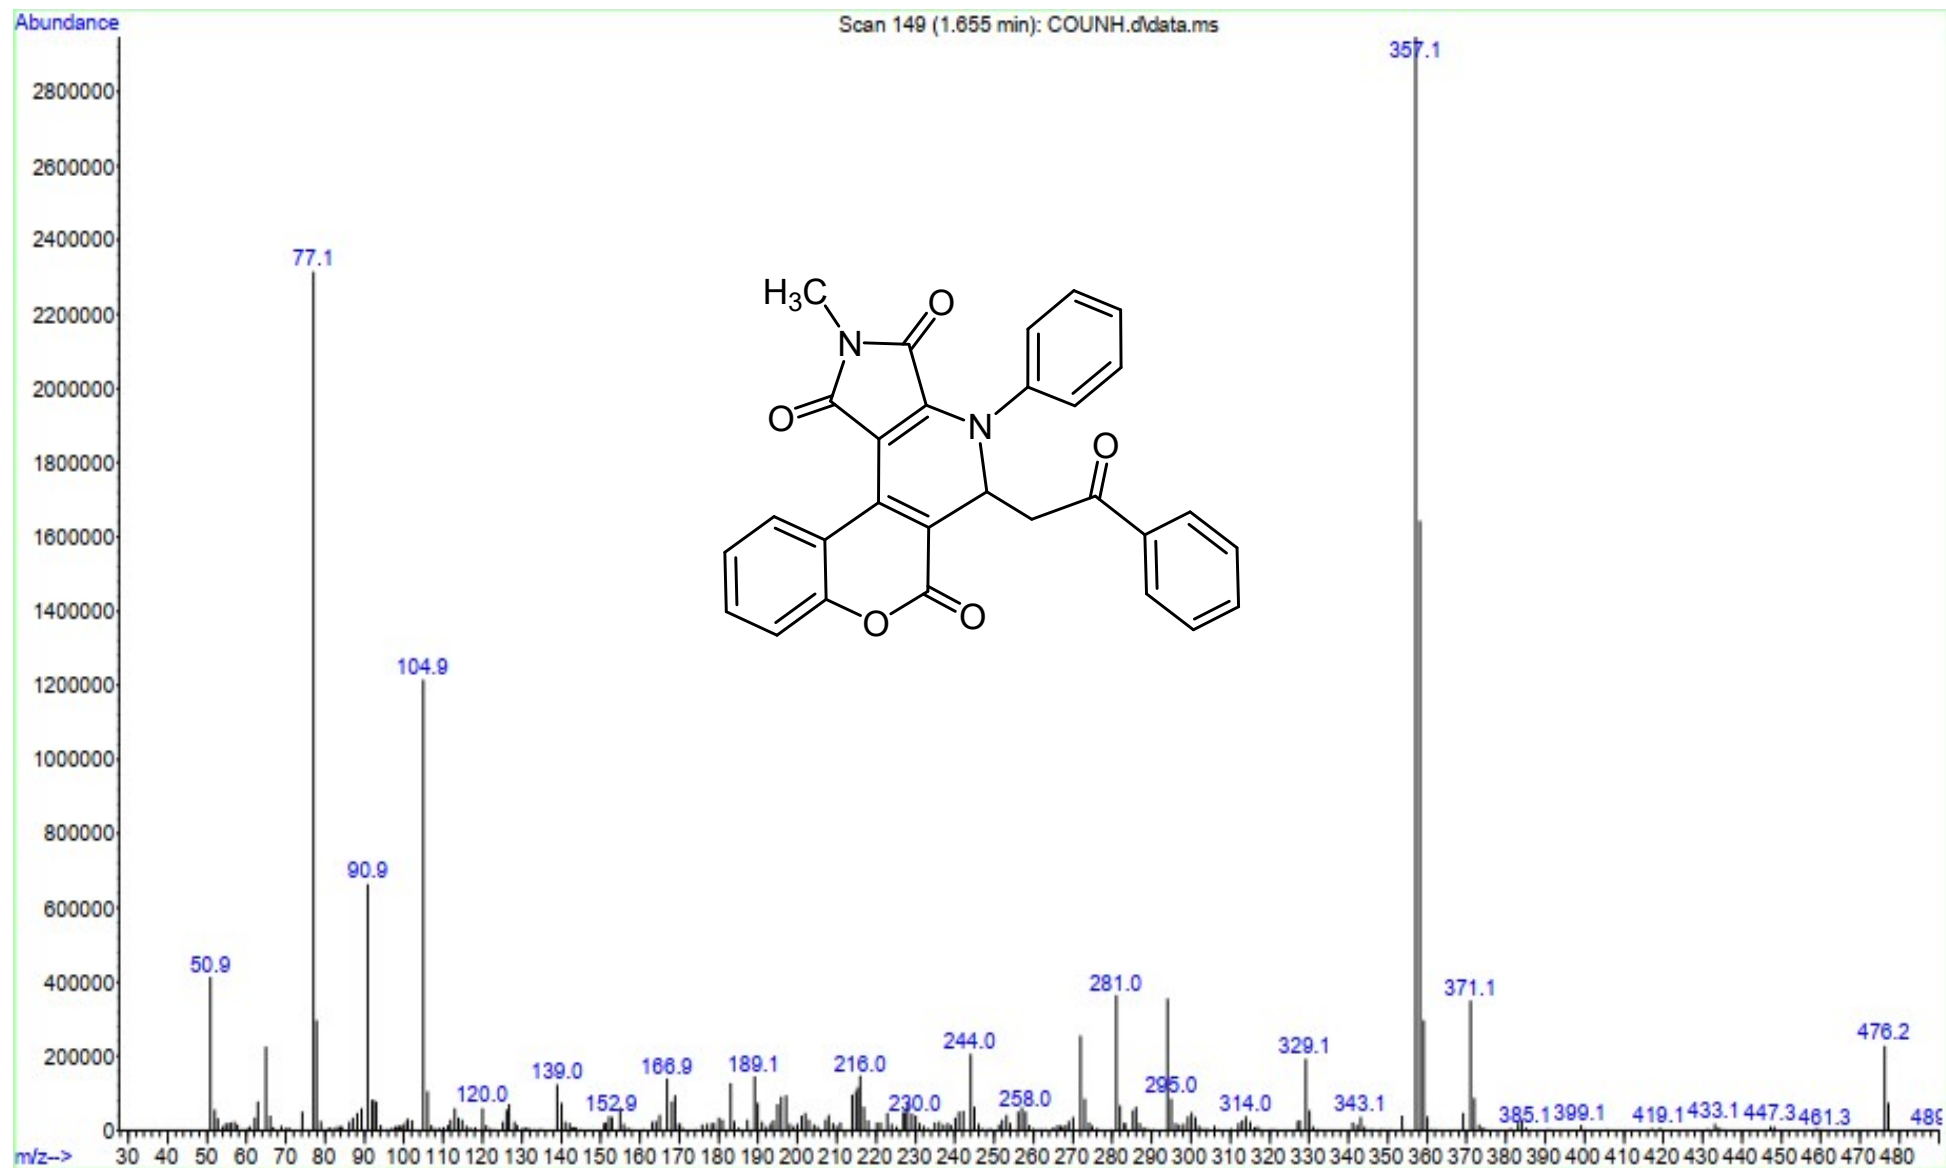

Mass spectrum of 3a

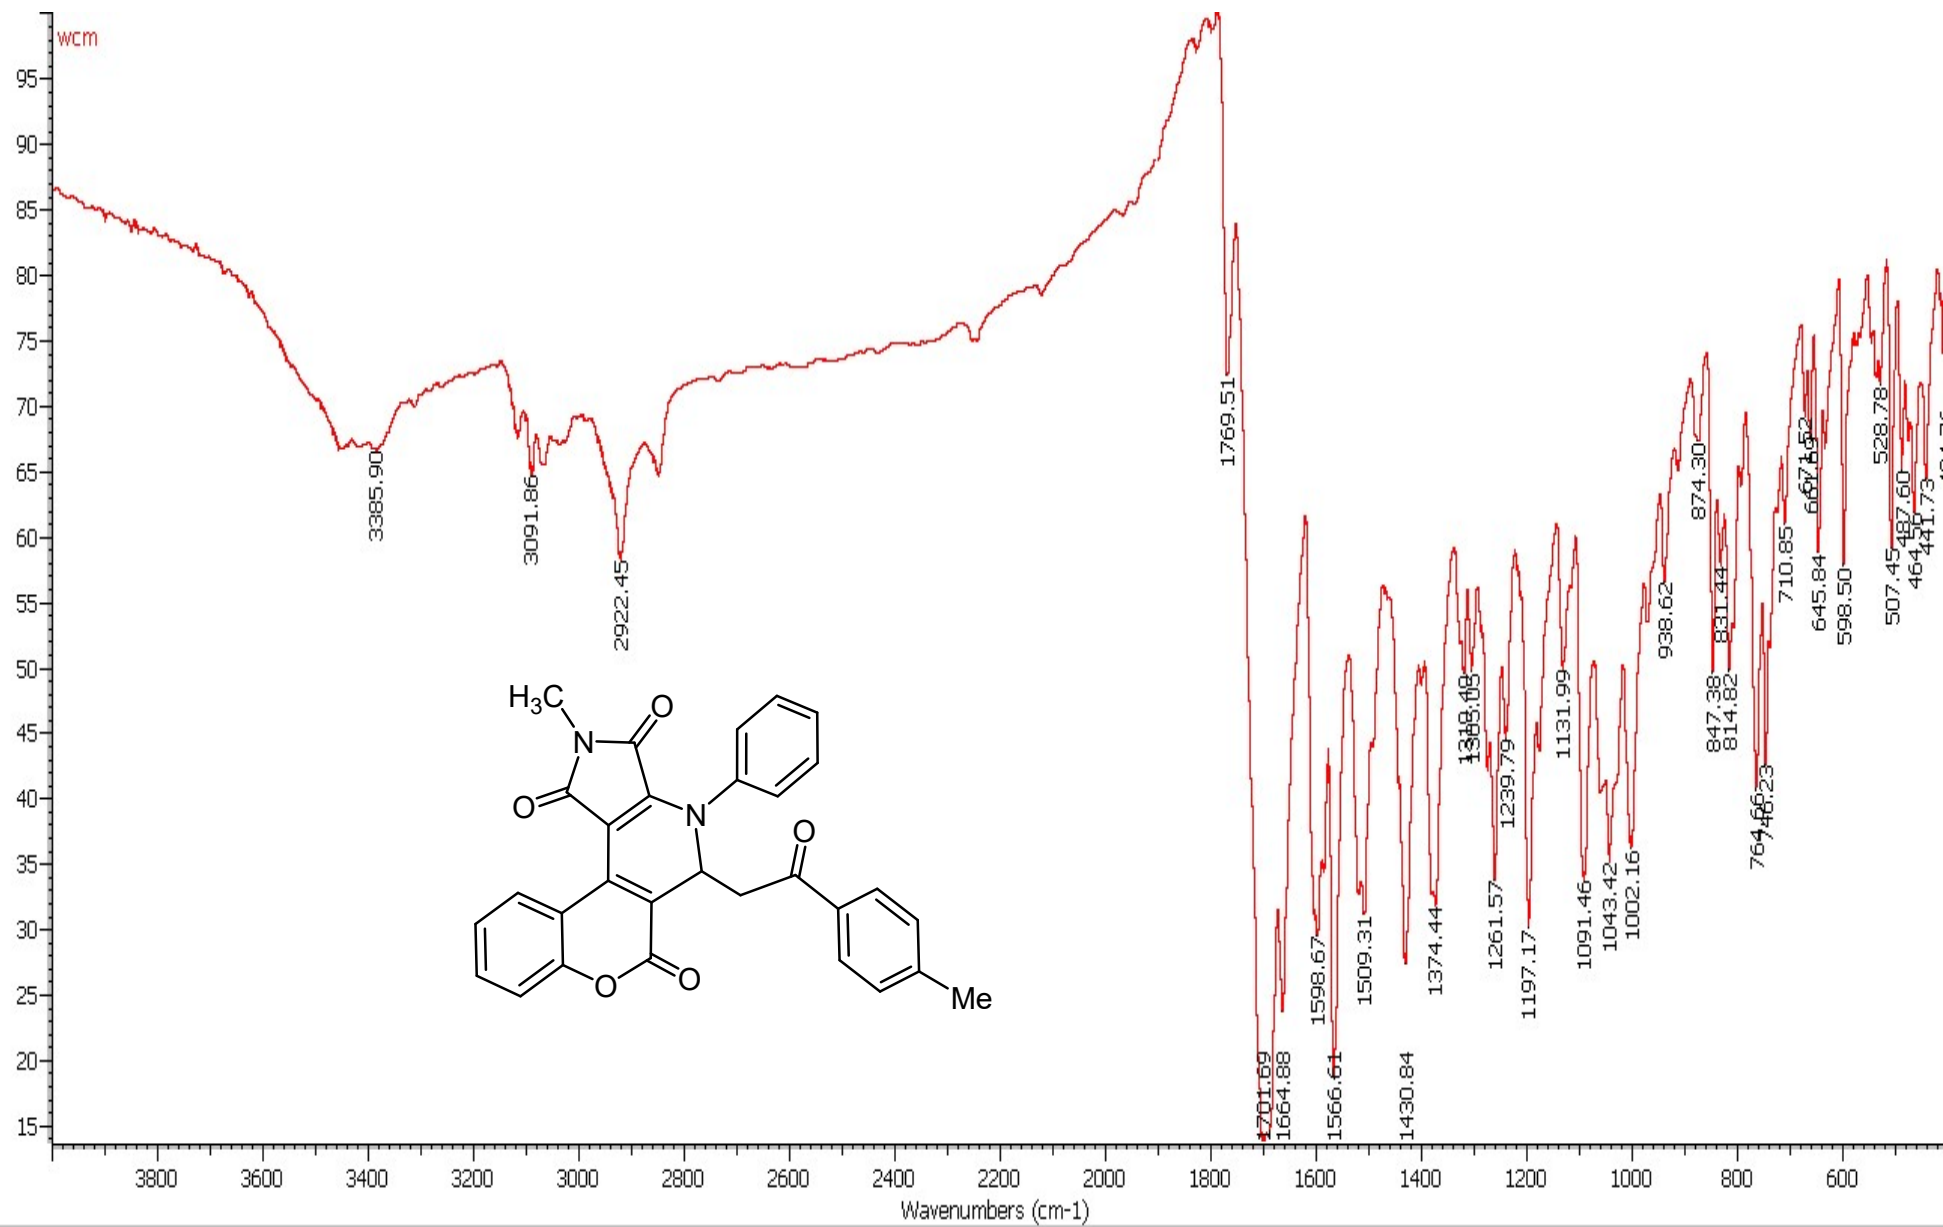

IR spectrum of **3b**

Rostampoor.27.fid  
WCC  
1H NMR

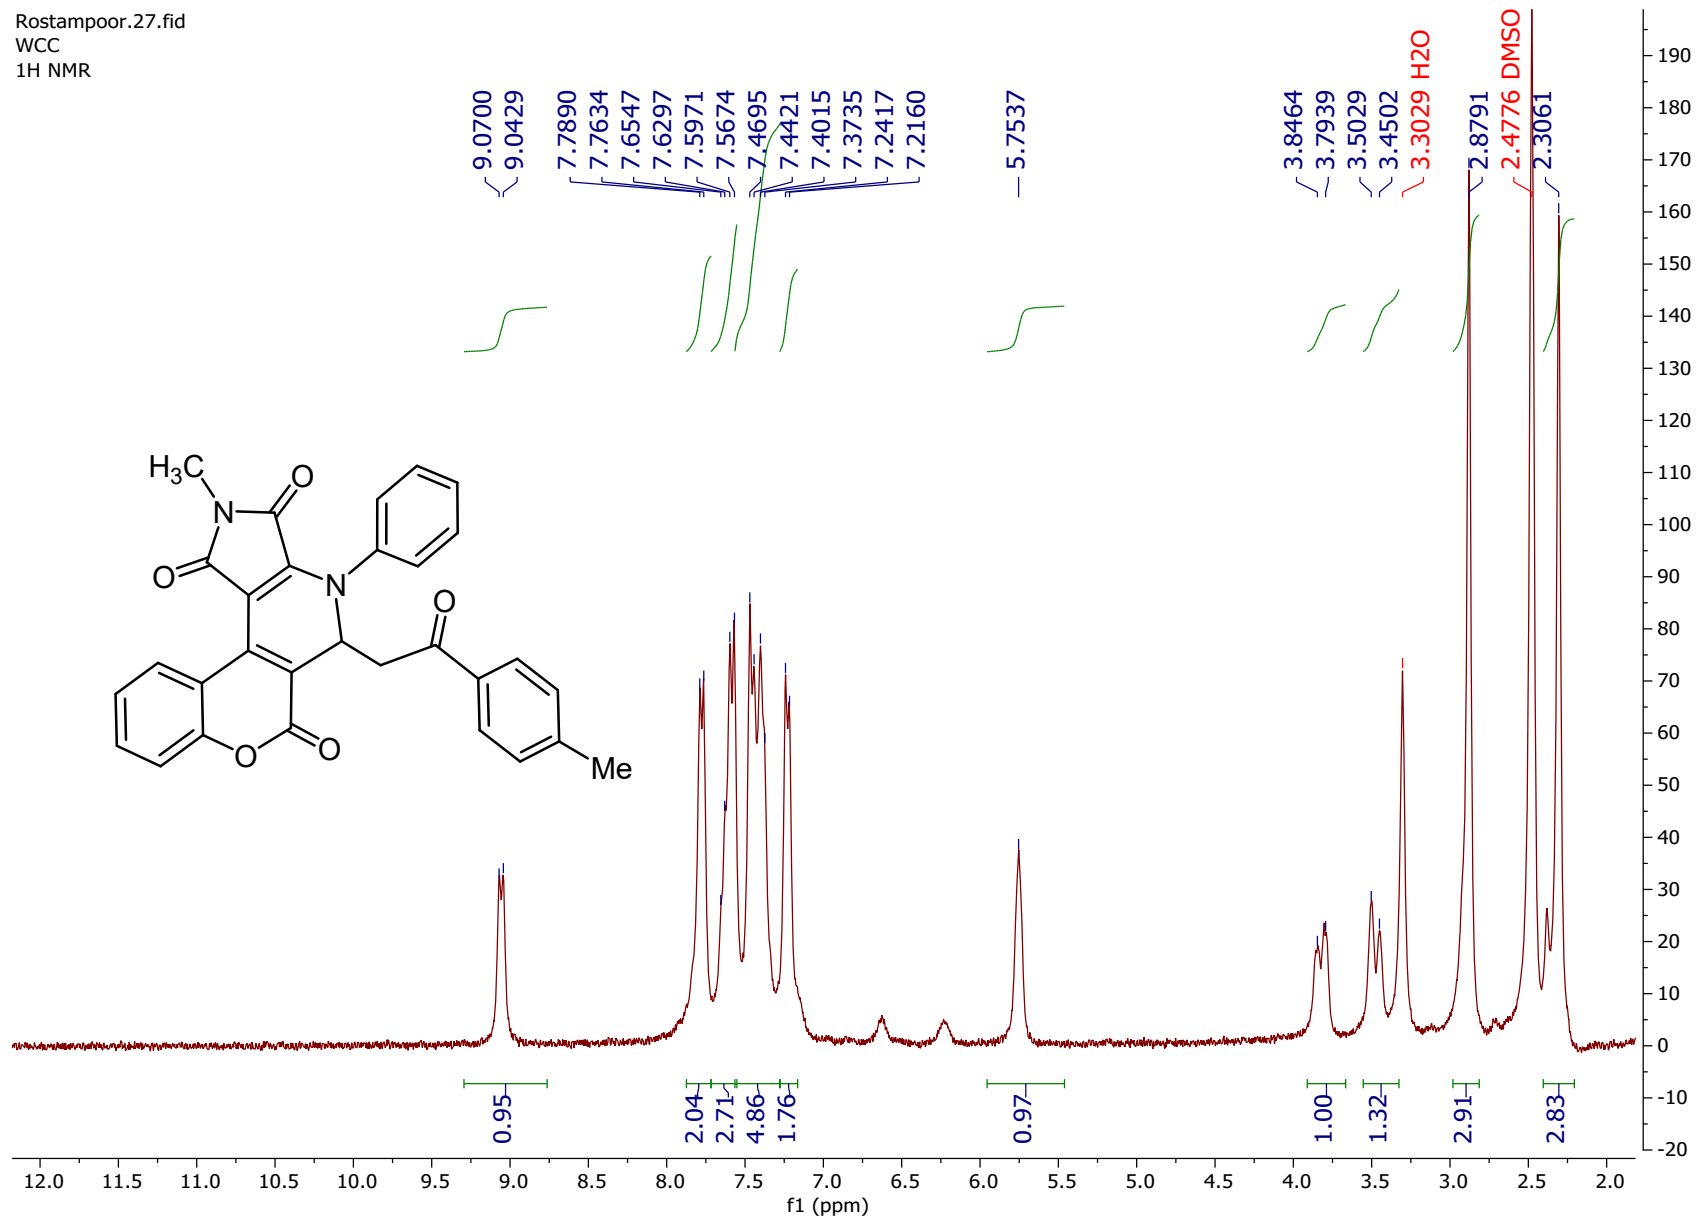

<sup>1</sup>H NMR Spectrum of **3b**

Rostampoor.31.fid  
WCC  
13C{1H} NMR

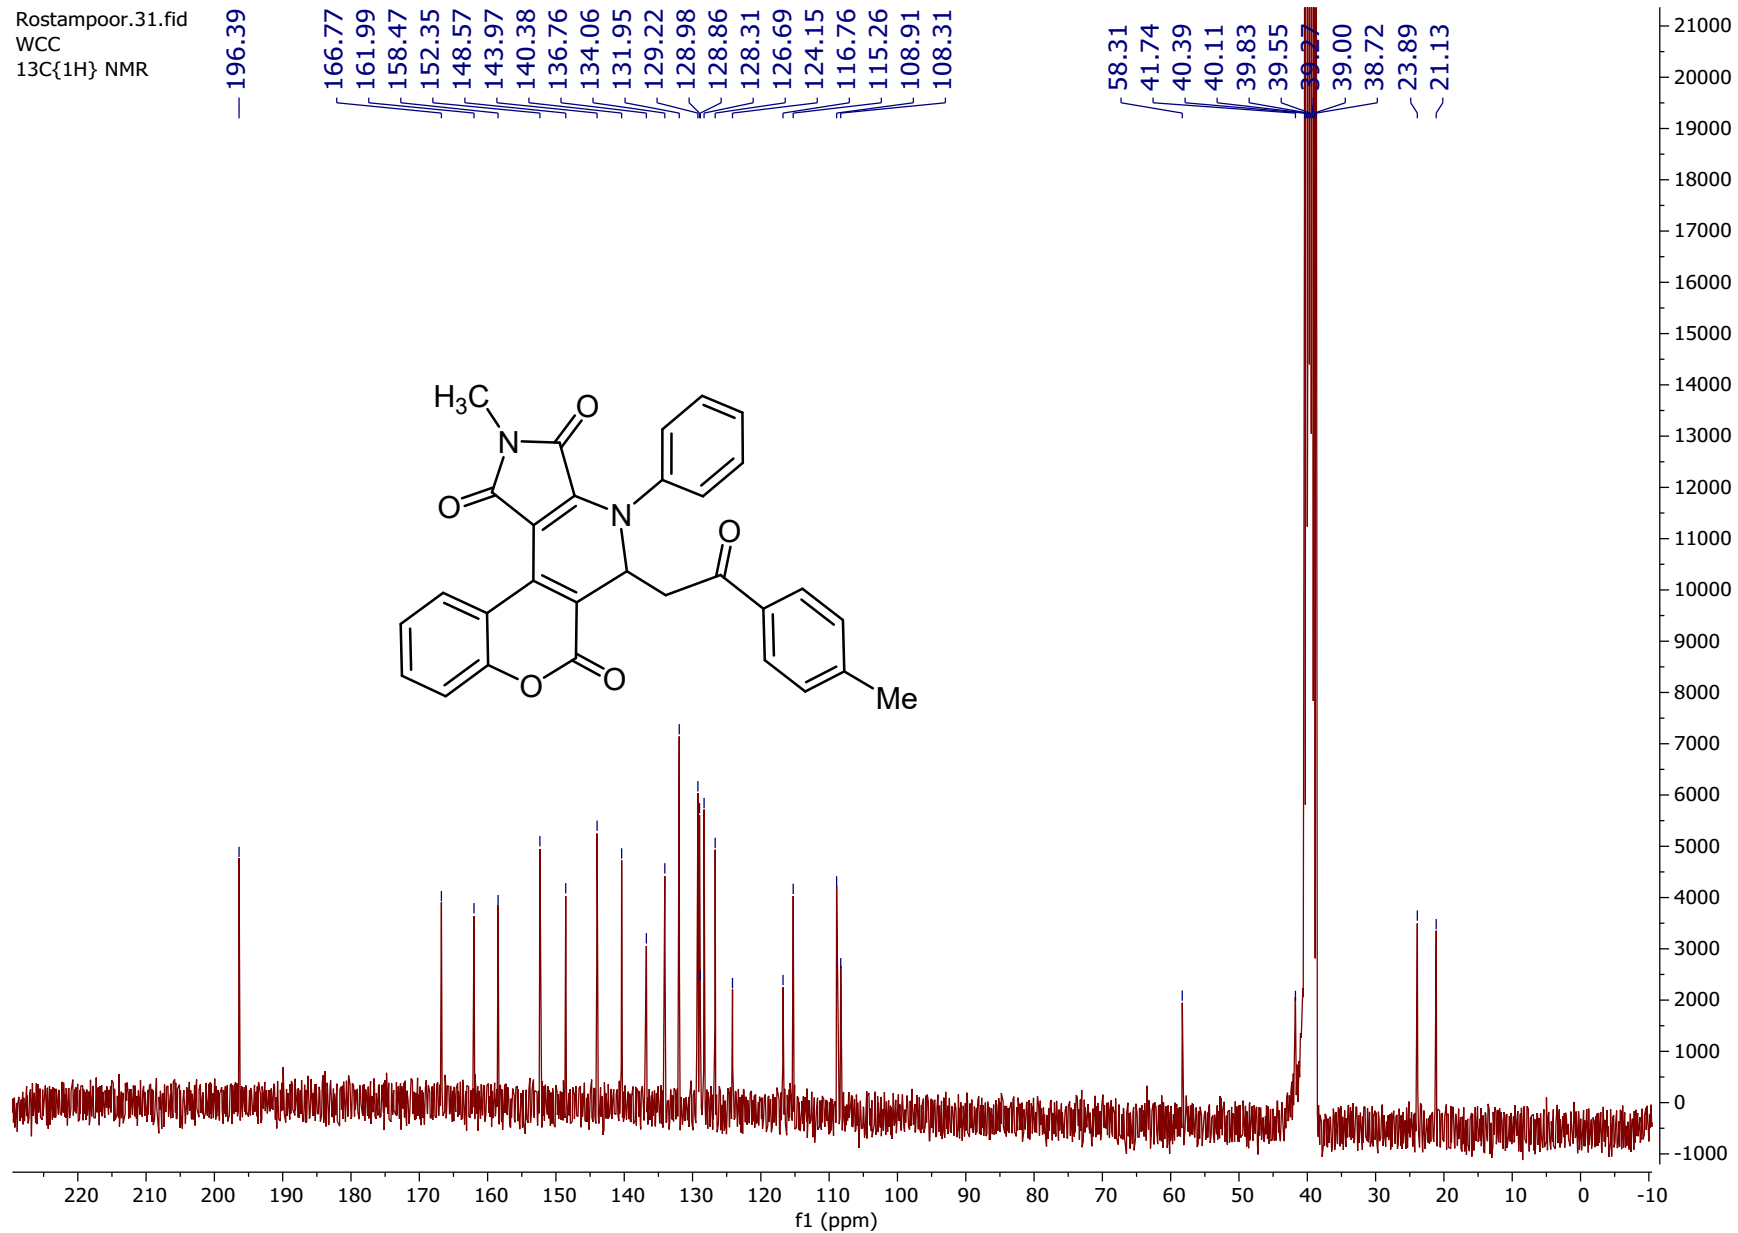

<sup>13</sup>C NMR Spectrum of **3b**

S21

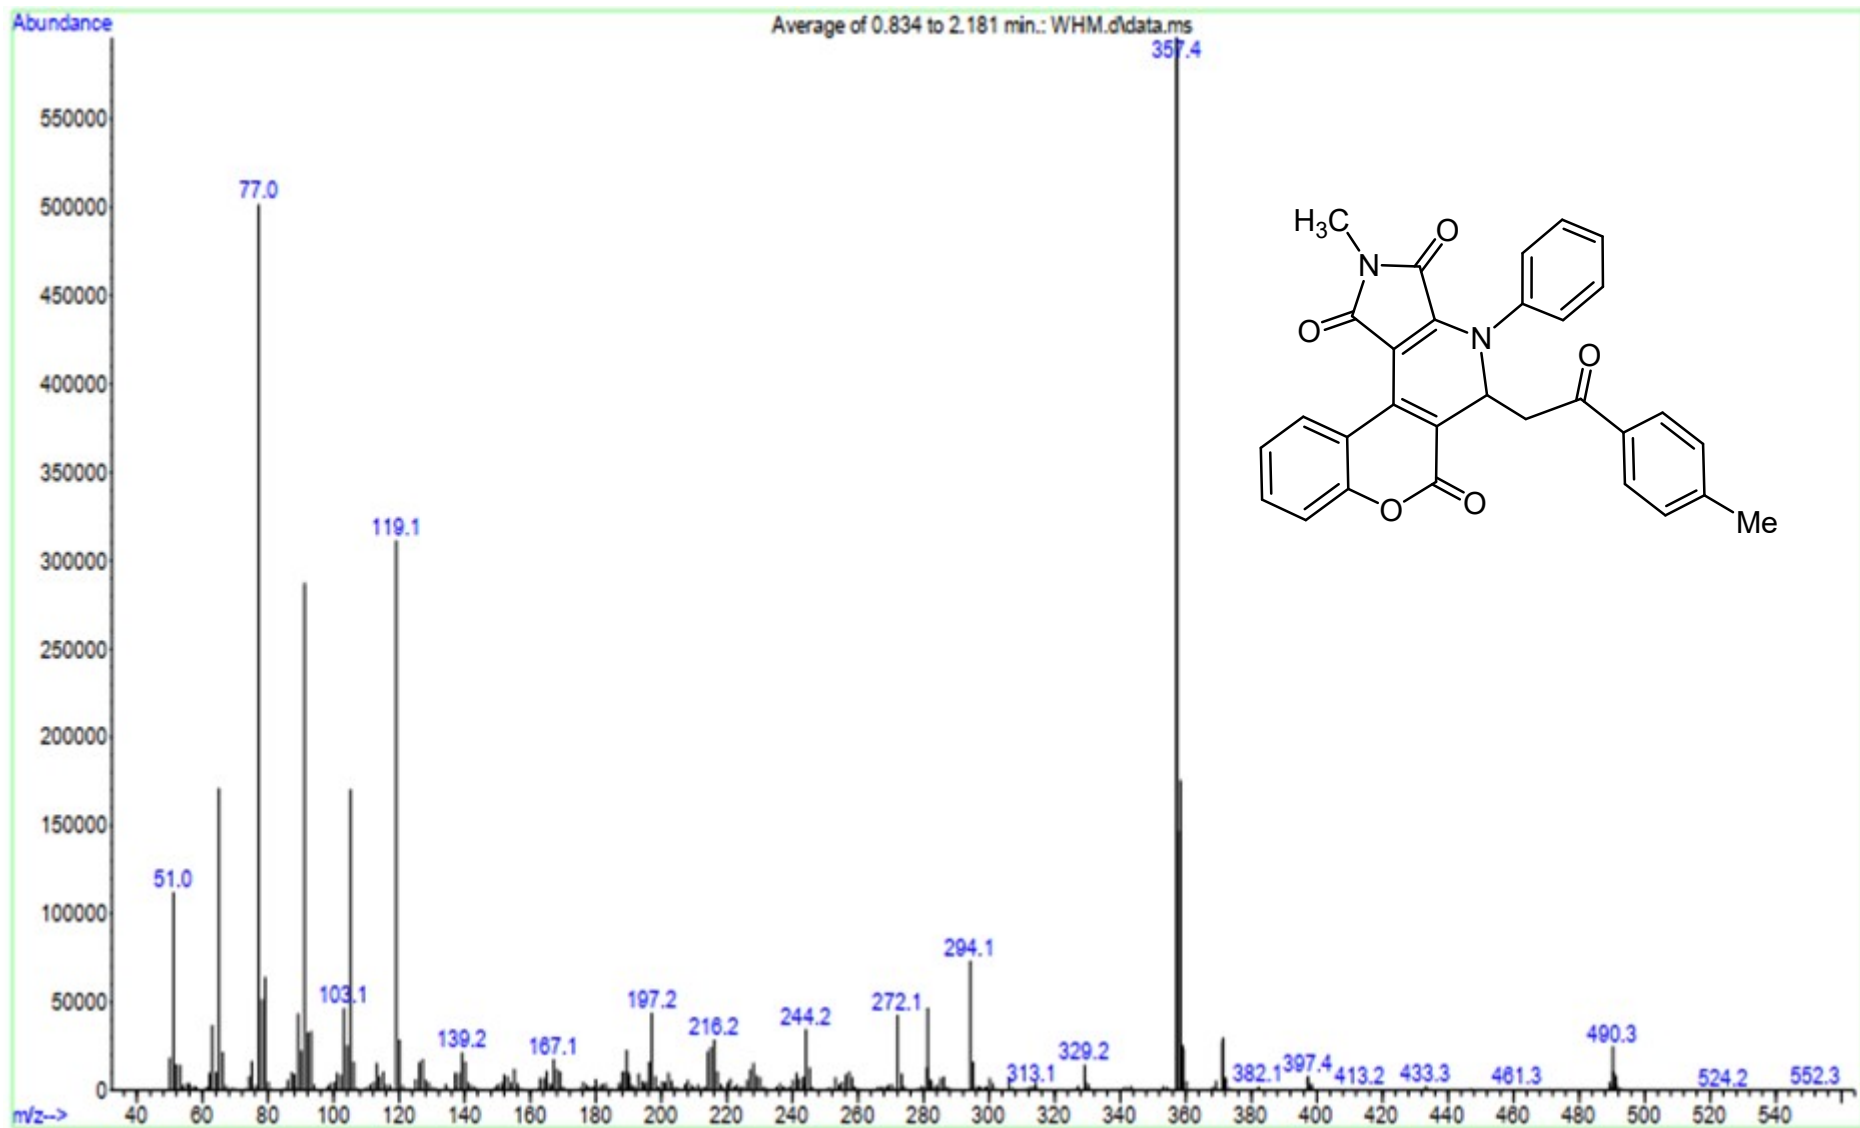

Mass spectrum of **3b**

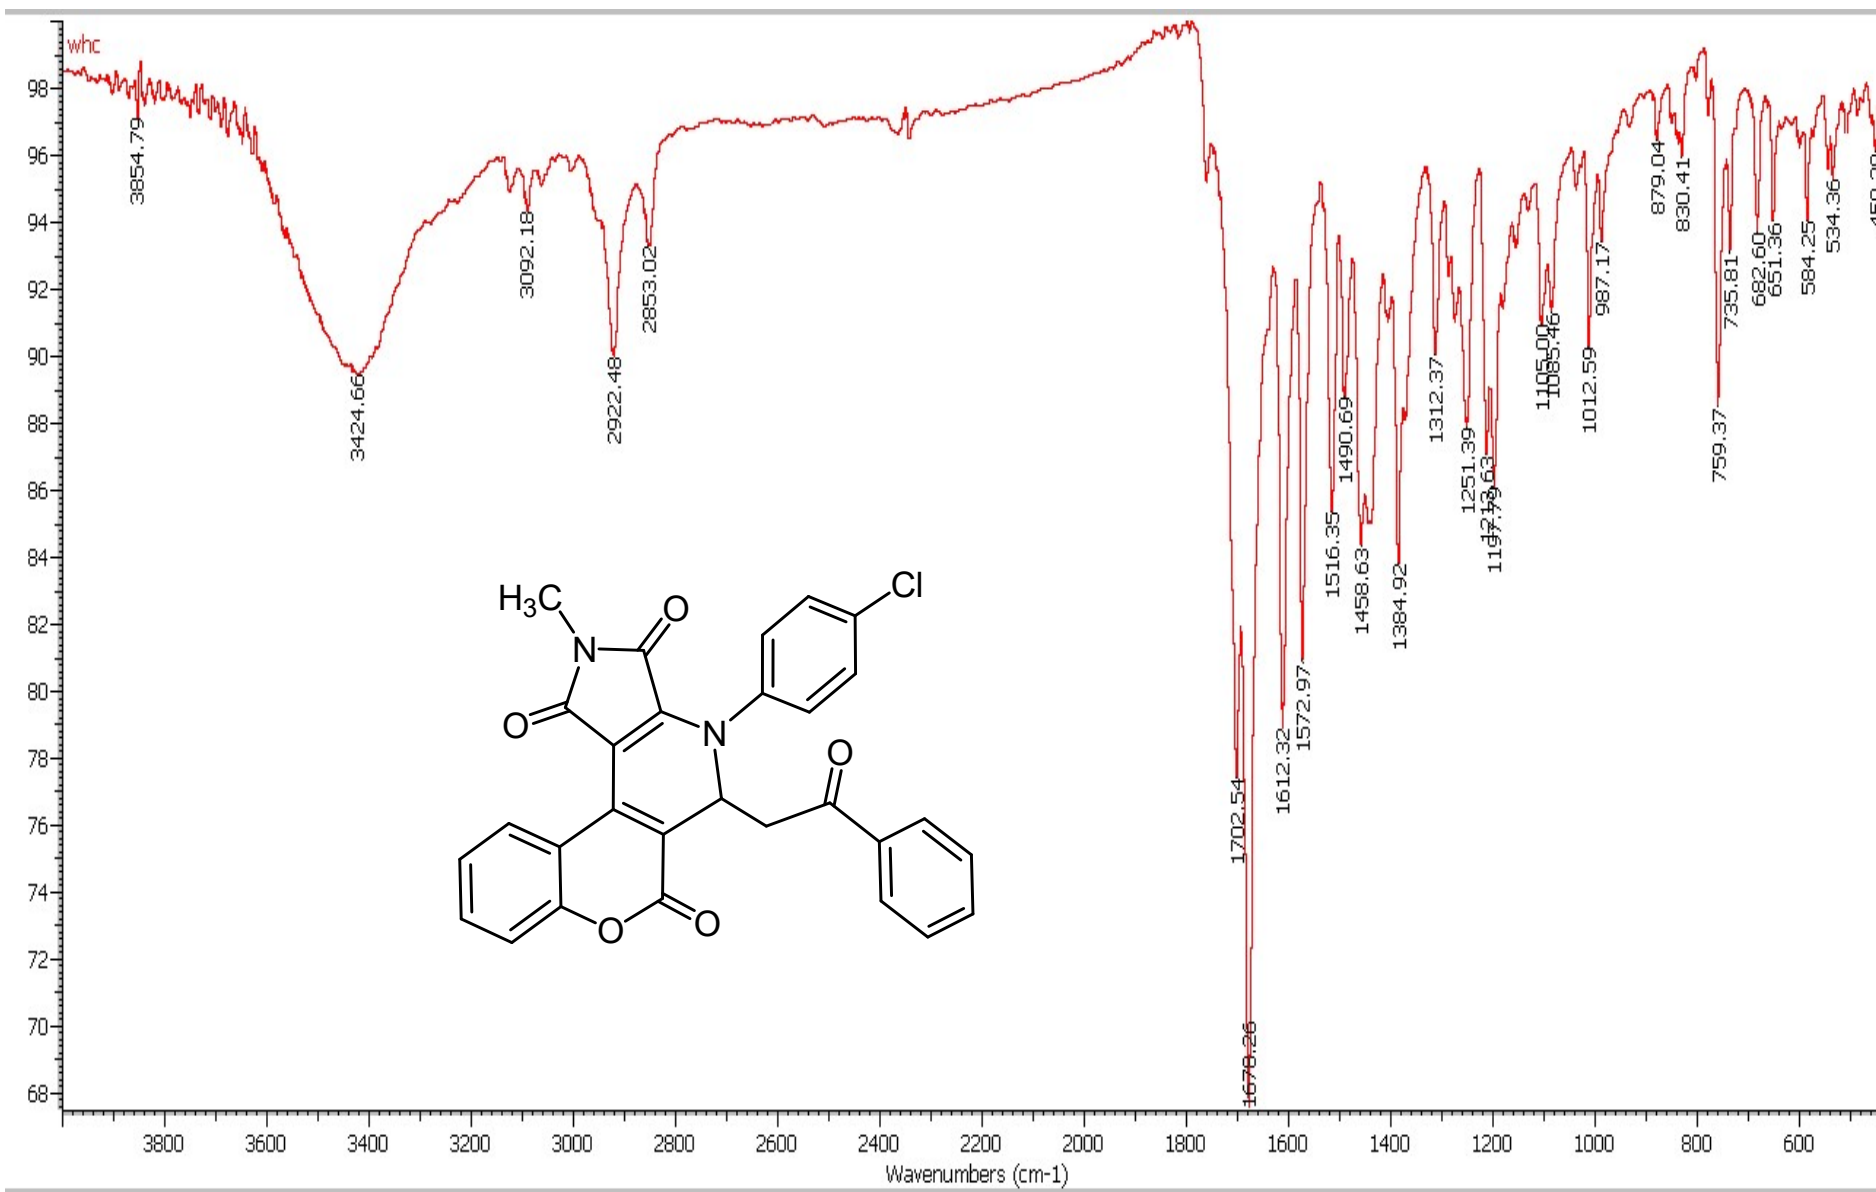

IR spectrum of 3c

S23

Rostampoor.29.fid  
WHC  
1H NMR

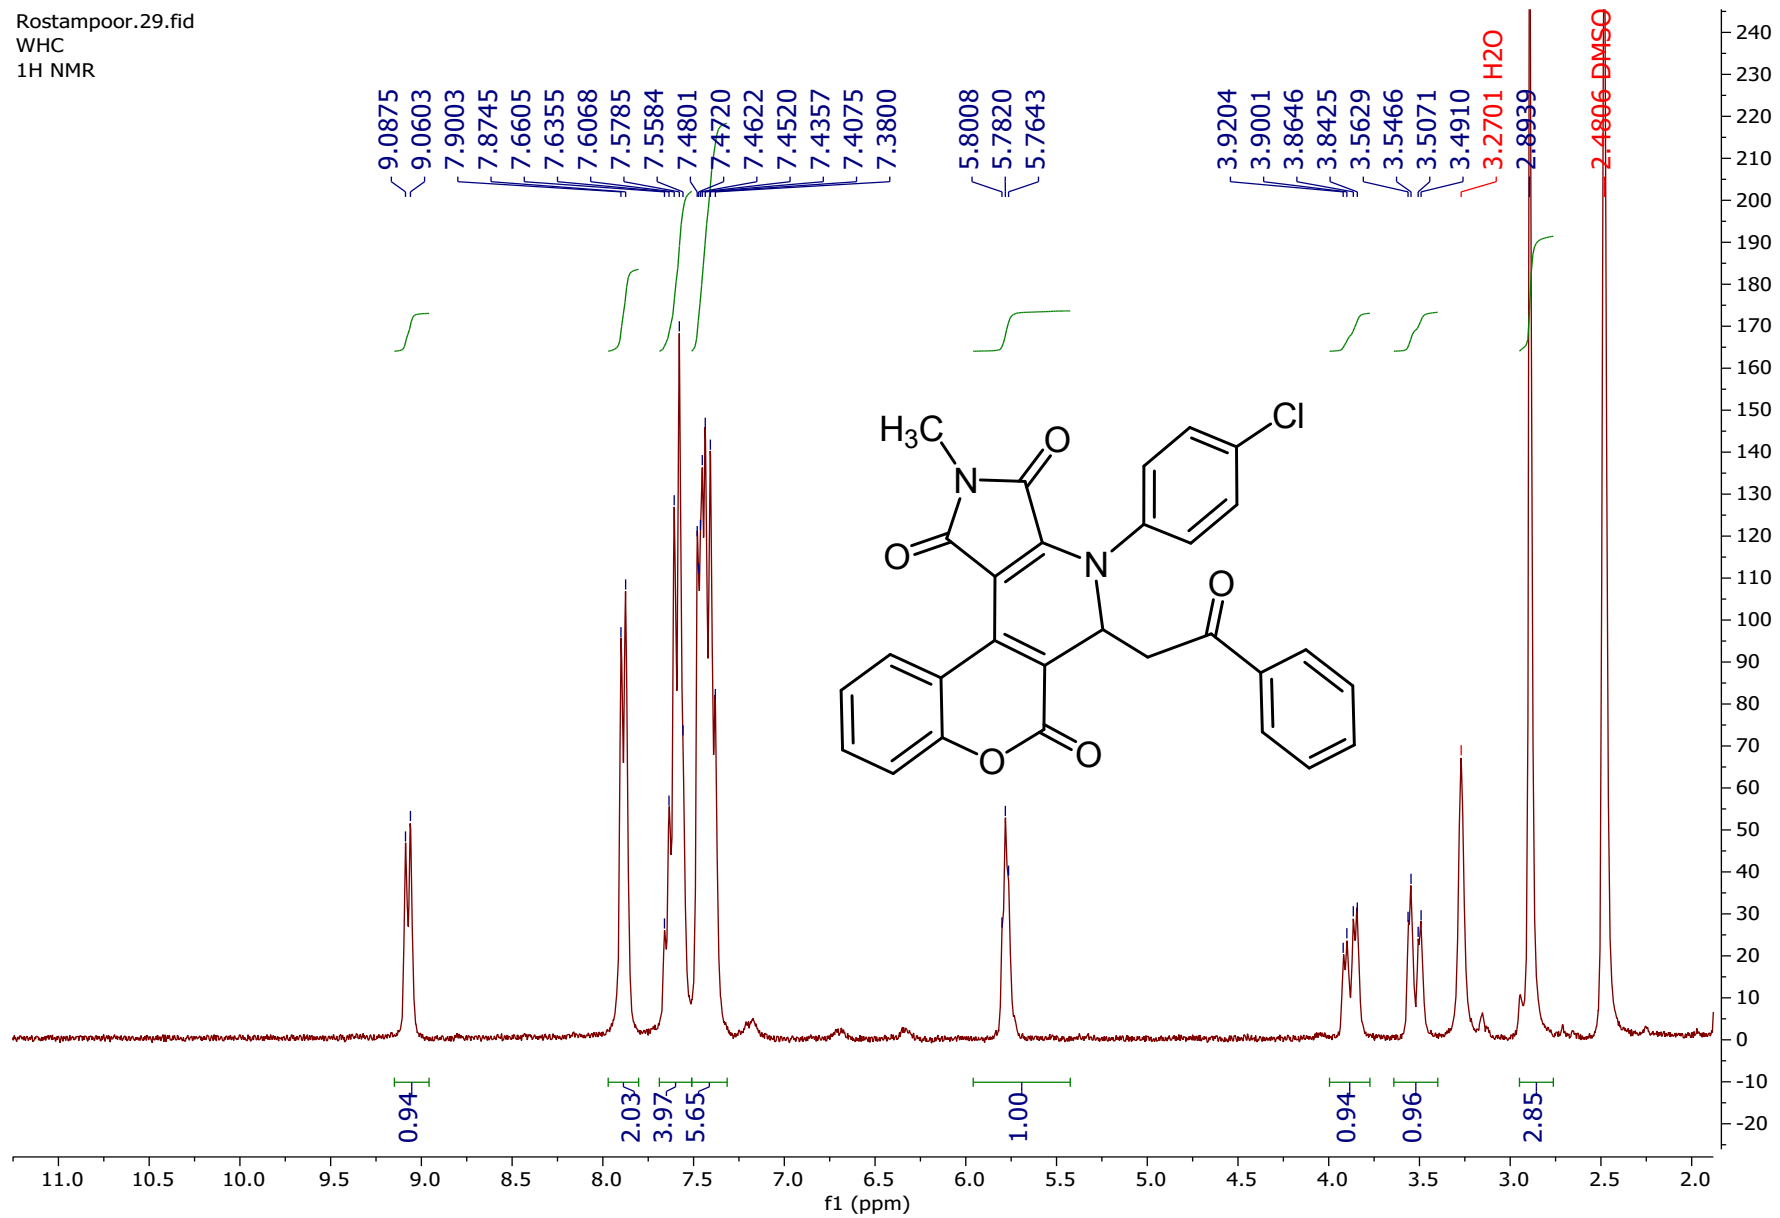

<sup>1</sup>H NMR Spectrum of 3c



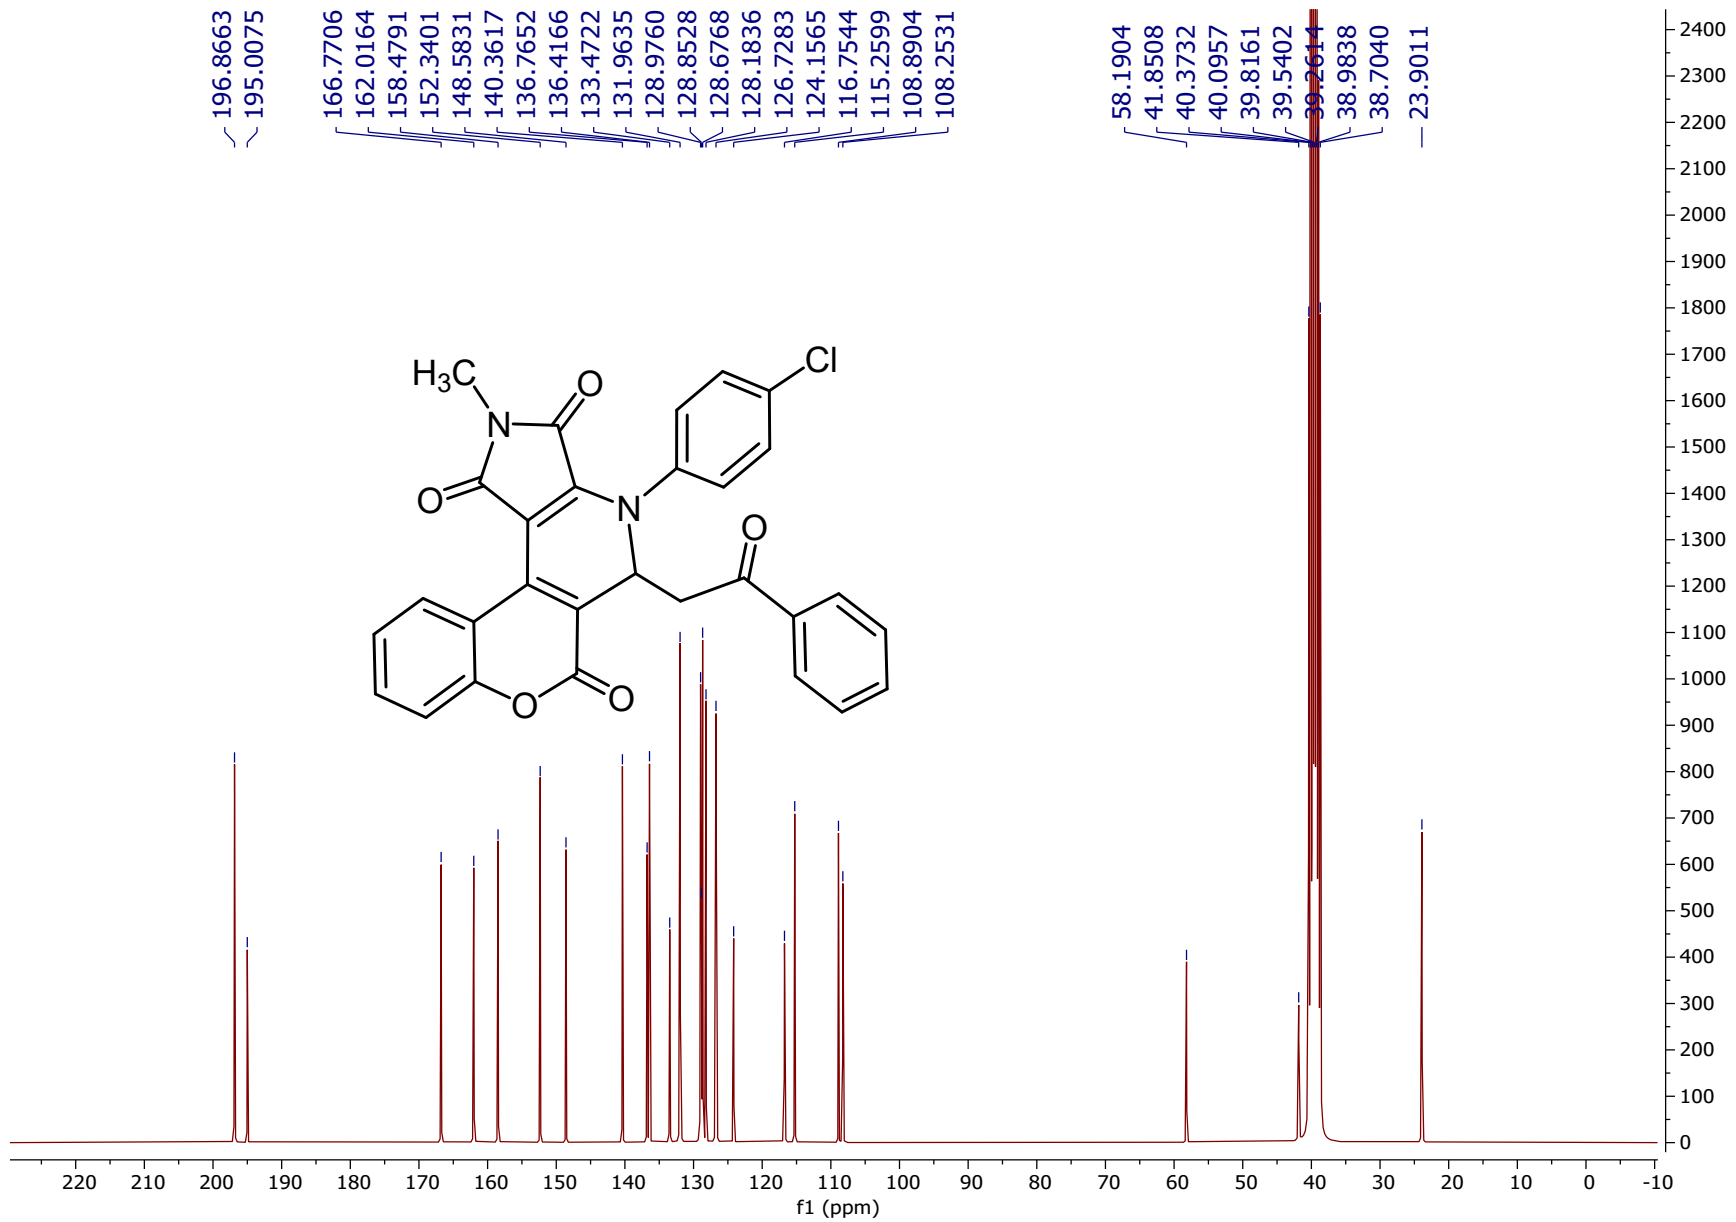

<sup>13</sup>C NMR Spectrum of 3c

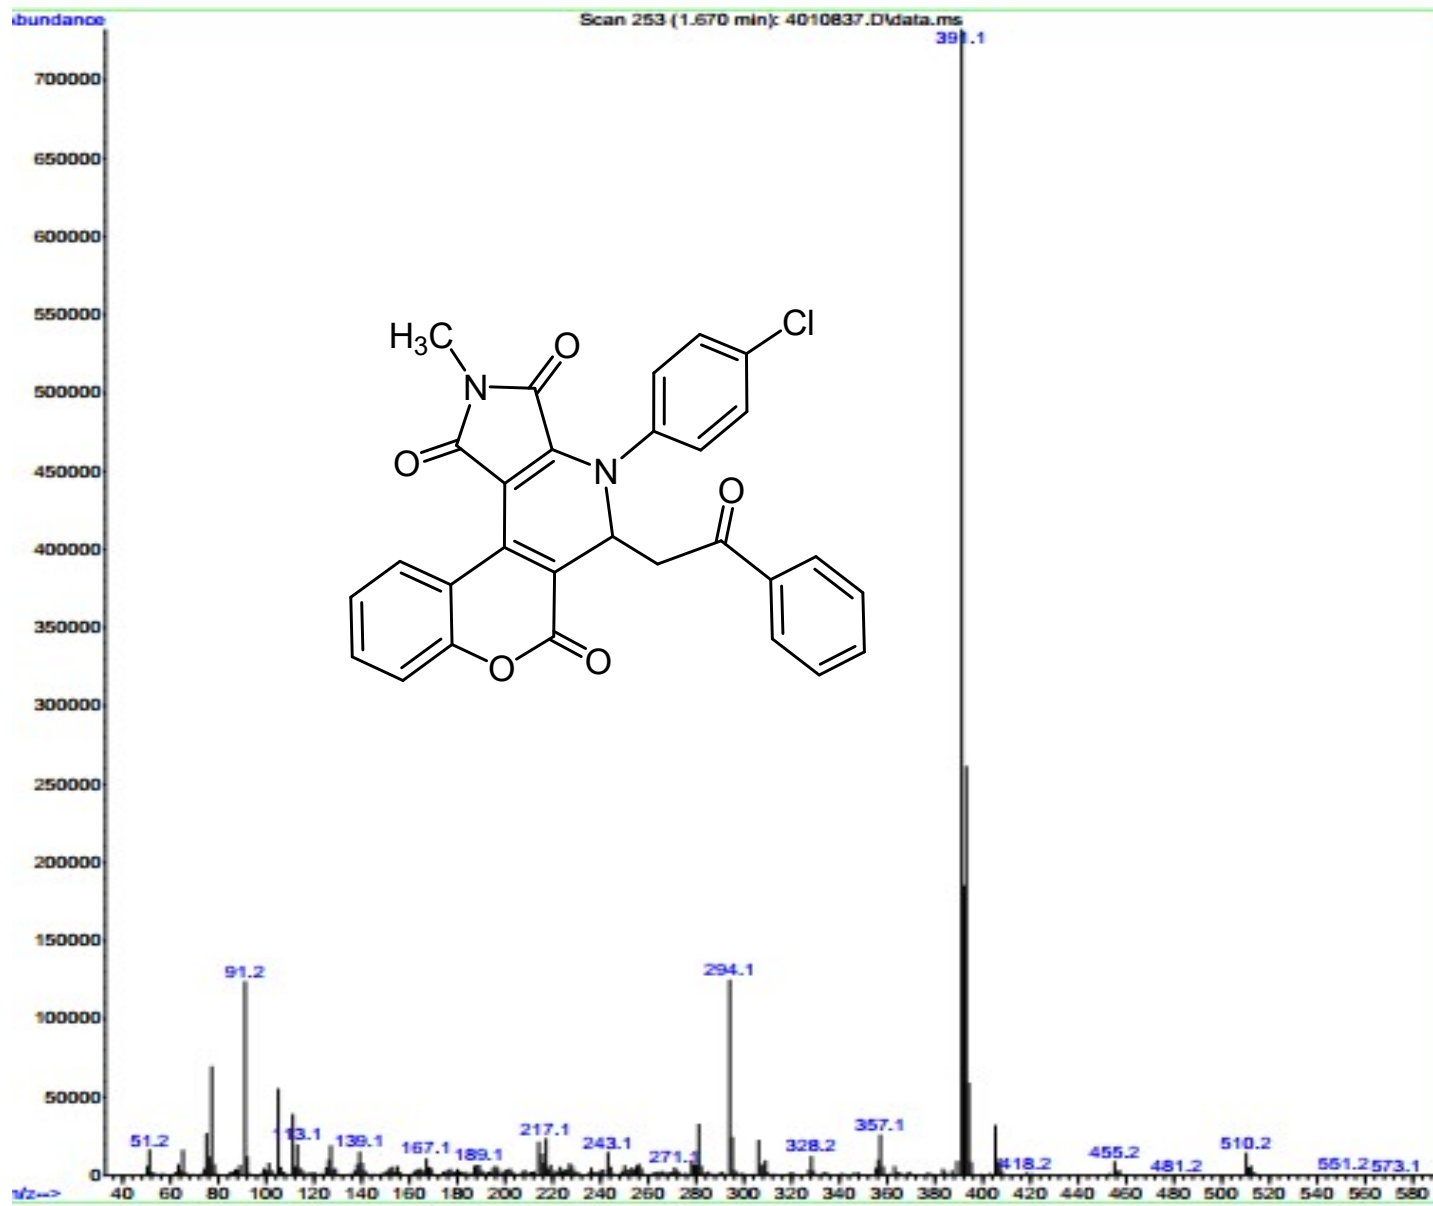

Mass spectrum of **3c**

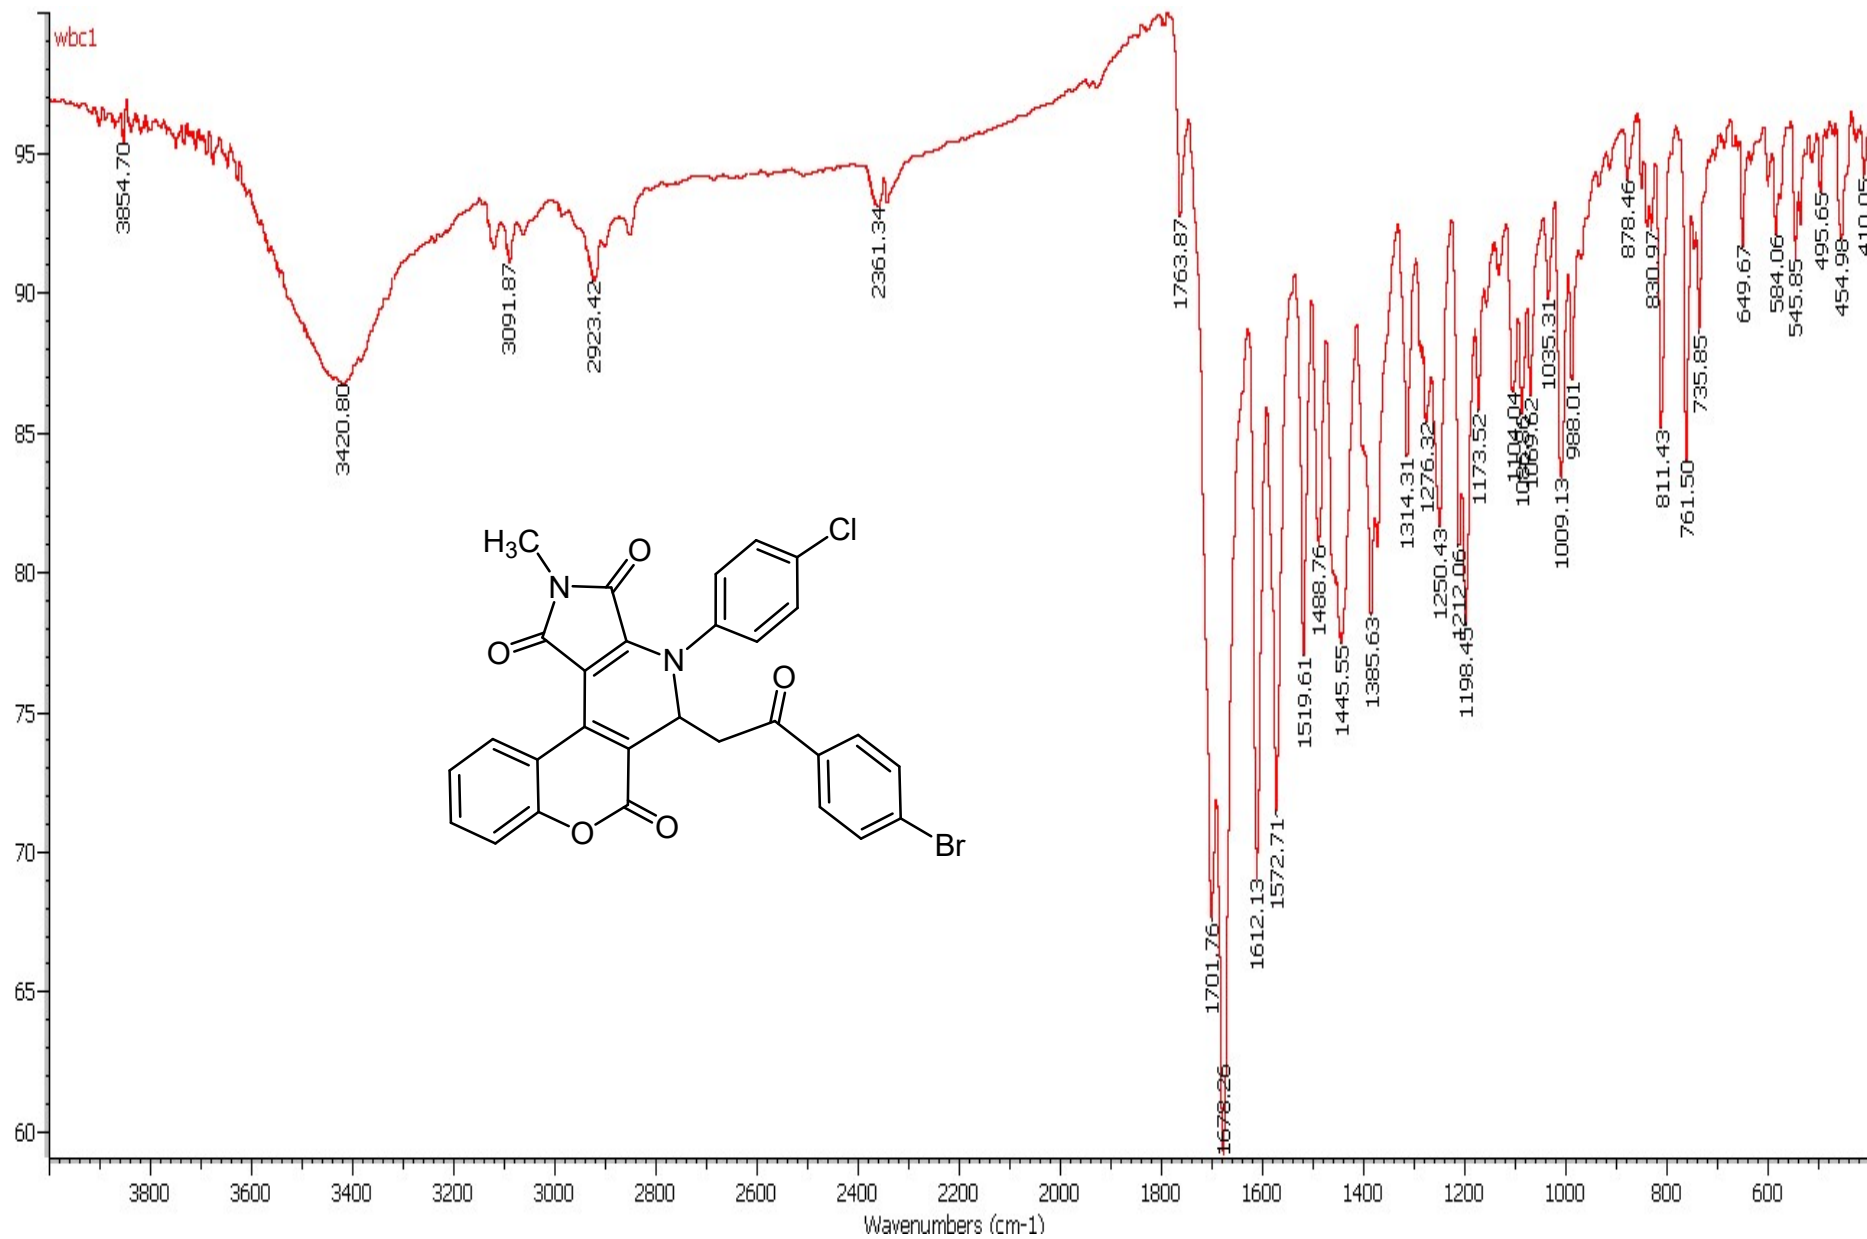

IR spectrum of 3d

Rostampoor.25.fid  
WBC  
1H NMR

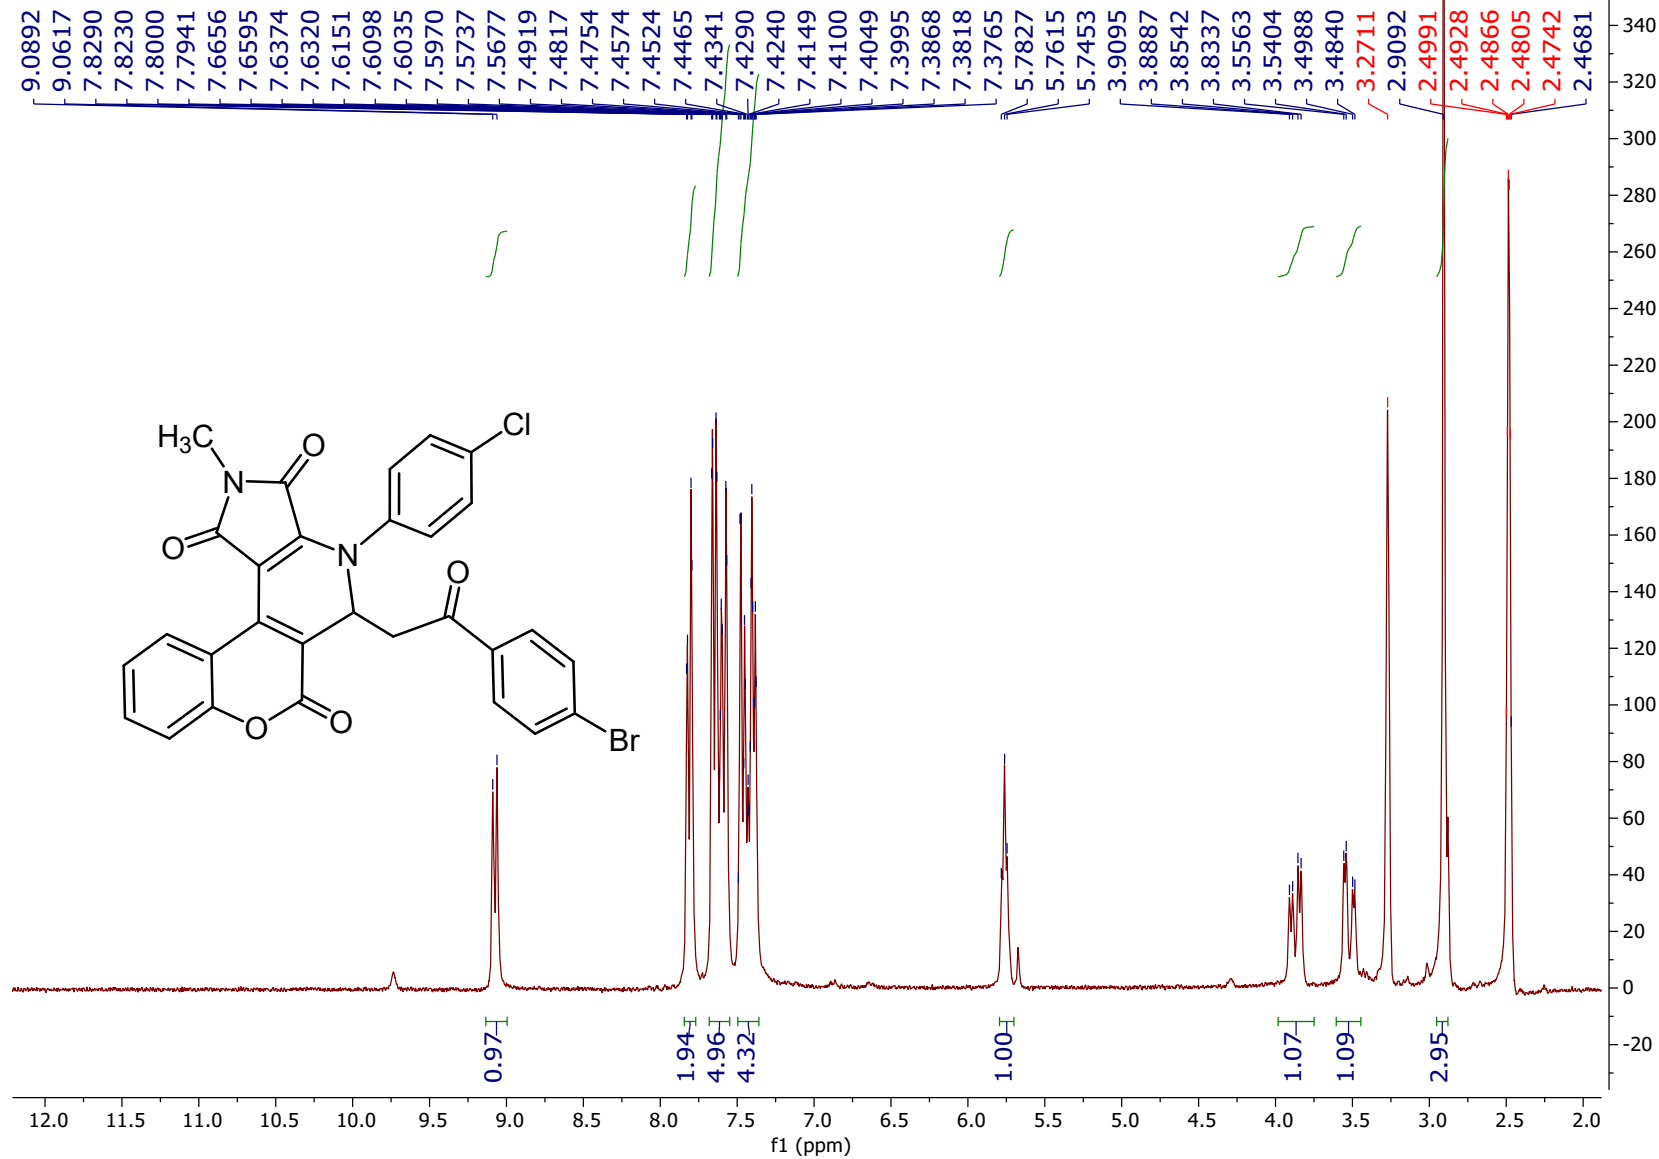

9.0892  
9.0617  
7.8290  
7.8230  
7.8000  
7.7941  
7.6656  
7.6595  
7.6374  
7.6320  
7.6151  
7.6098  
7.6035  
7.5970  
7.5737  
7.5677  
7.4919  
7.4817  
7.4754  
7.4574  
7.4524  
7.4465  
7.4341  
7.4290  
7.4240  
7.4149  
7.4100  
7.4049  
7.3995  
7.3868  
7.3818  
7.3765  
5.7827  
5.7615  
5.7453  
3.9095  
3.8887  
3.8542  
3.8337  
3.5563  
3.5404  
3.4988  
3.4840  
3.2711 H2O  
2.9092  
2.4991 DMSO  
2.4928 DMSO  
2.4866 DMSO  
2.4805 DMSO  
2.4742 DMSO  
2.4681

<sup>1</sup>H NMR Spectrum of 3d  
S28

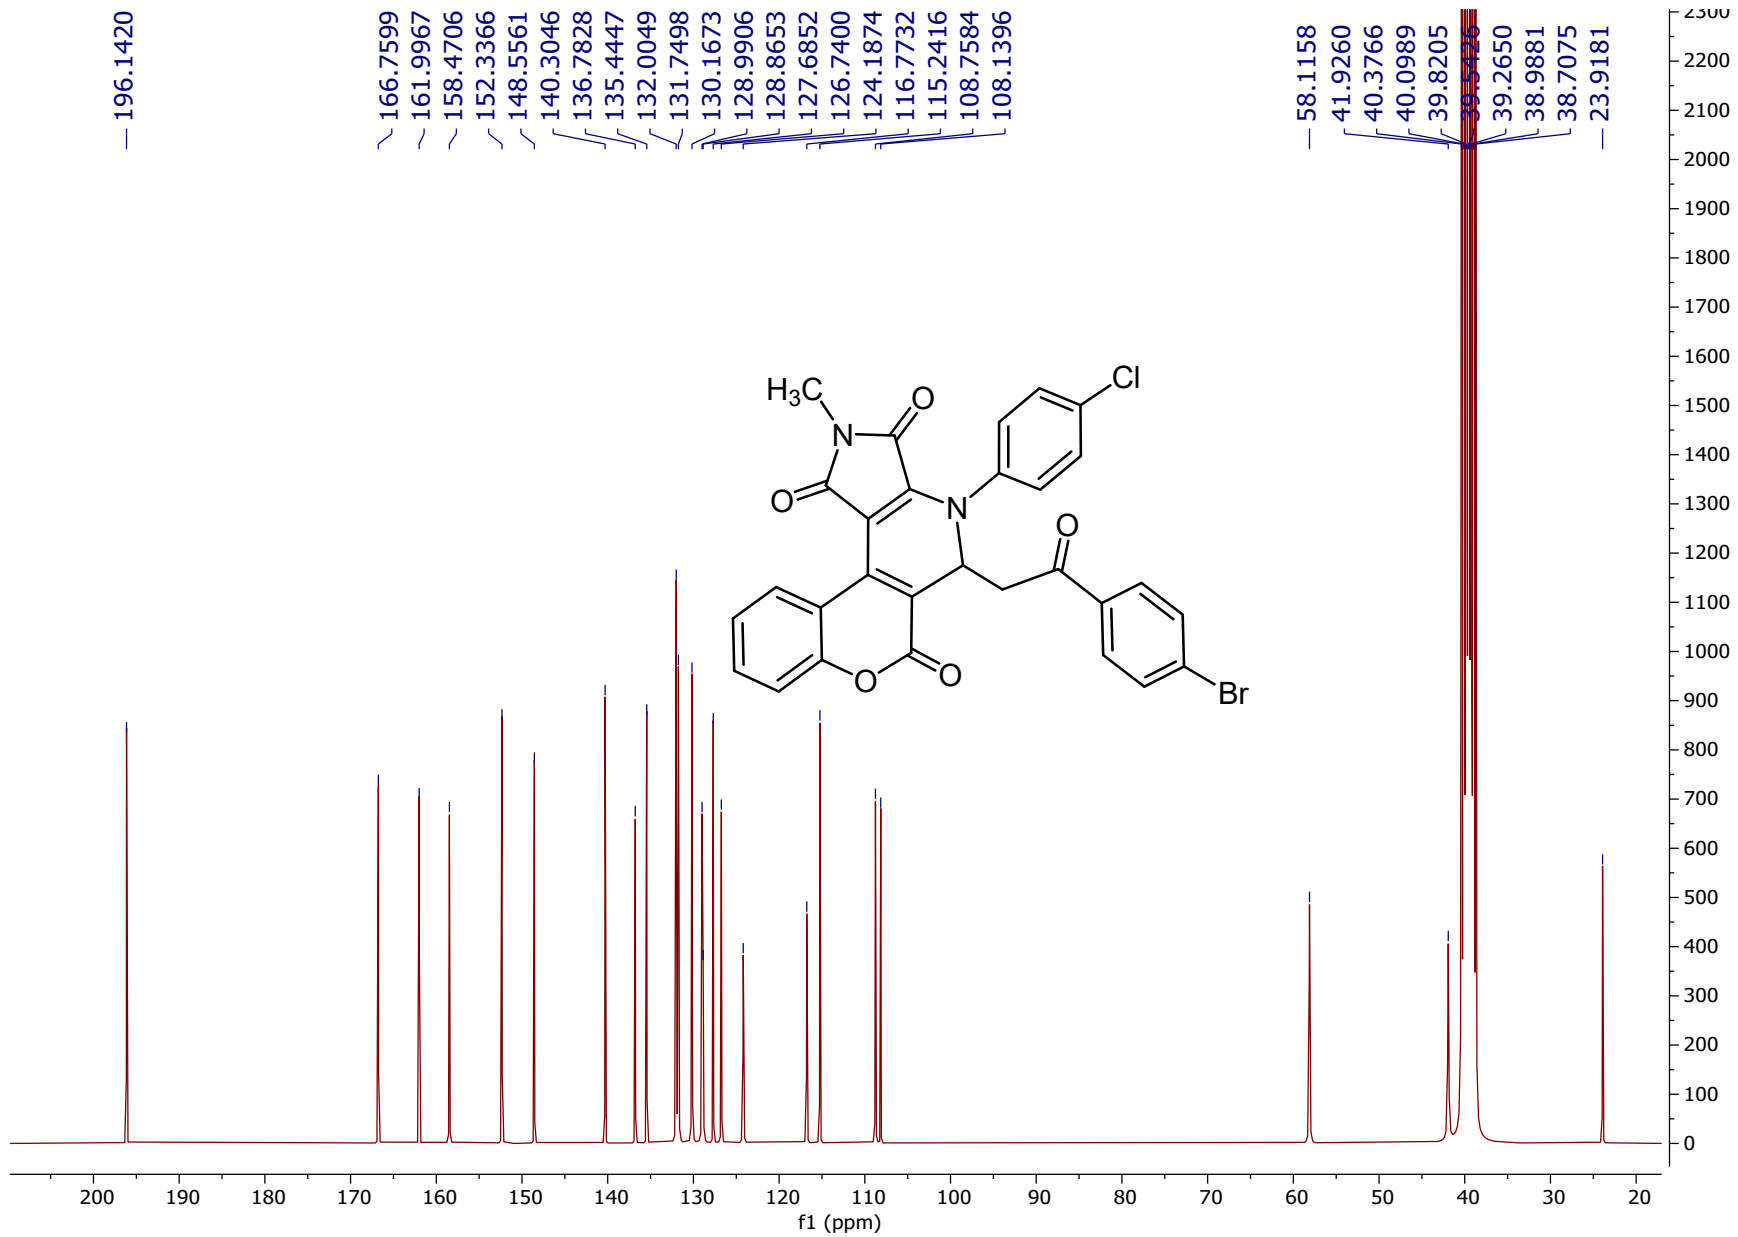

<sup>13</sup>C NMR Spectrum of 3d

S29

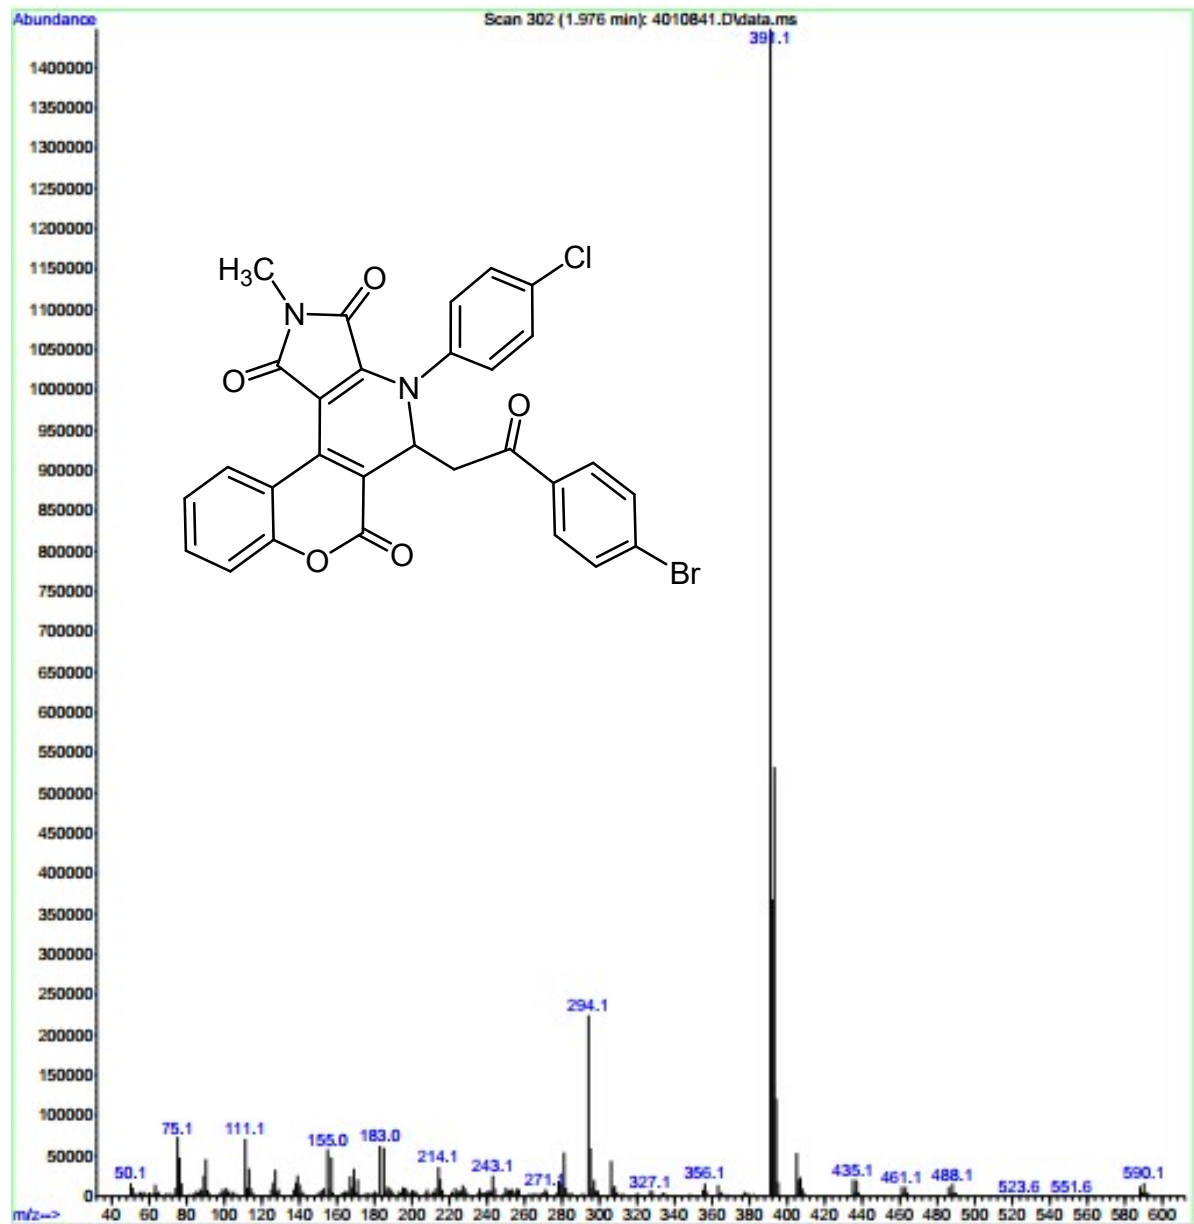

Mass spectrum of 3d  
S30

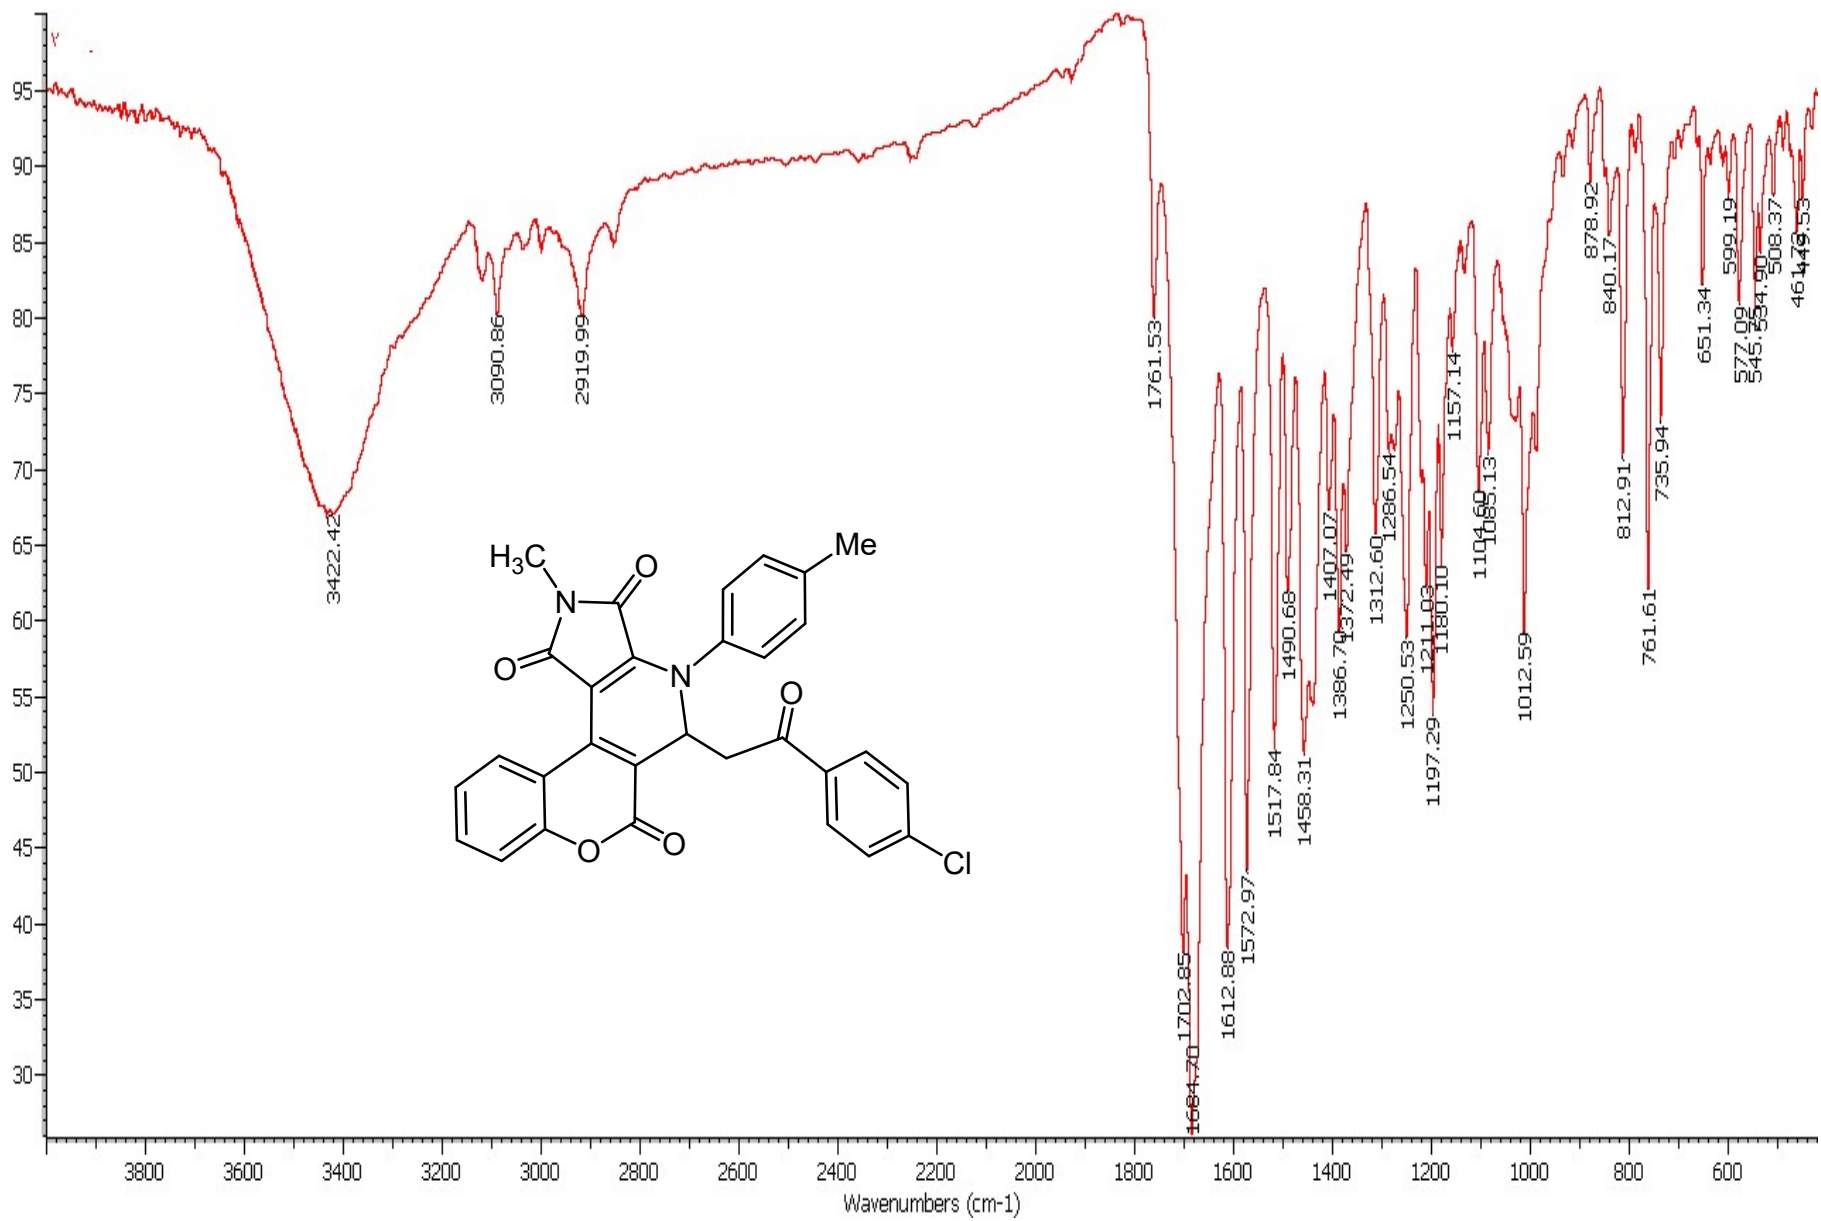

IR spectrum of 3e

Rostampoor.43.fid  
WCM  
1H NMR

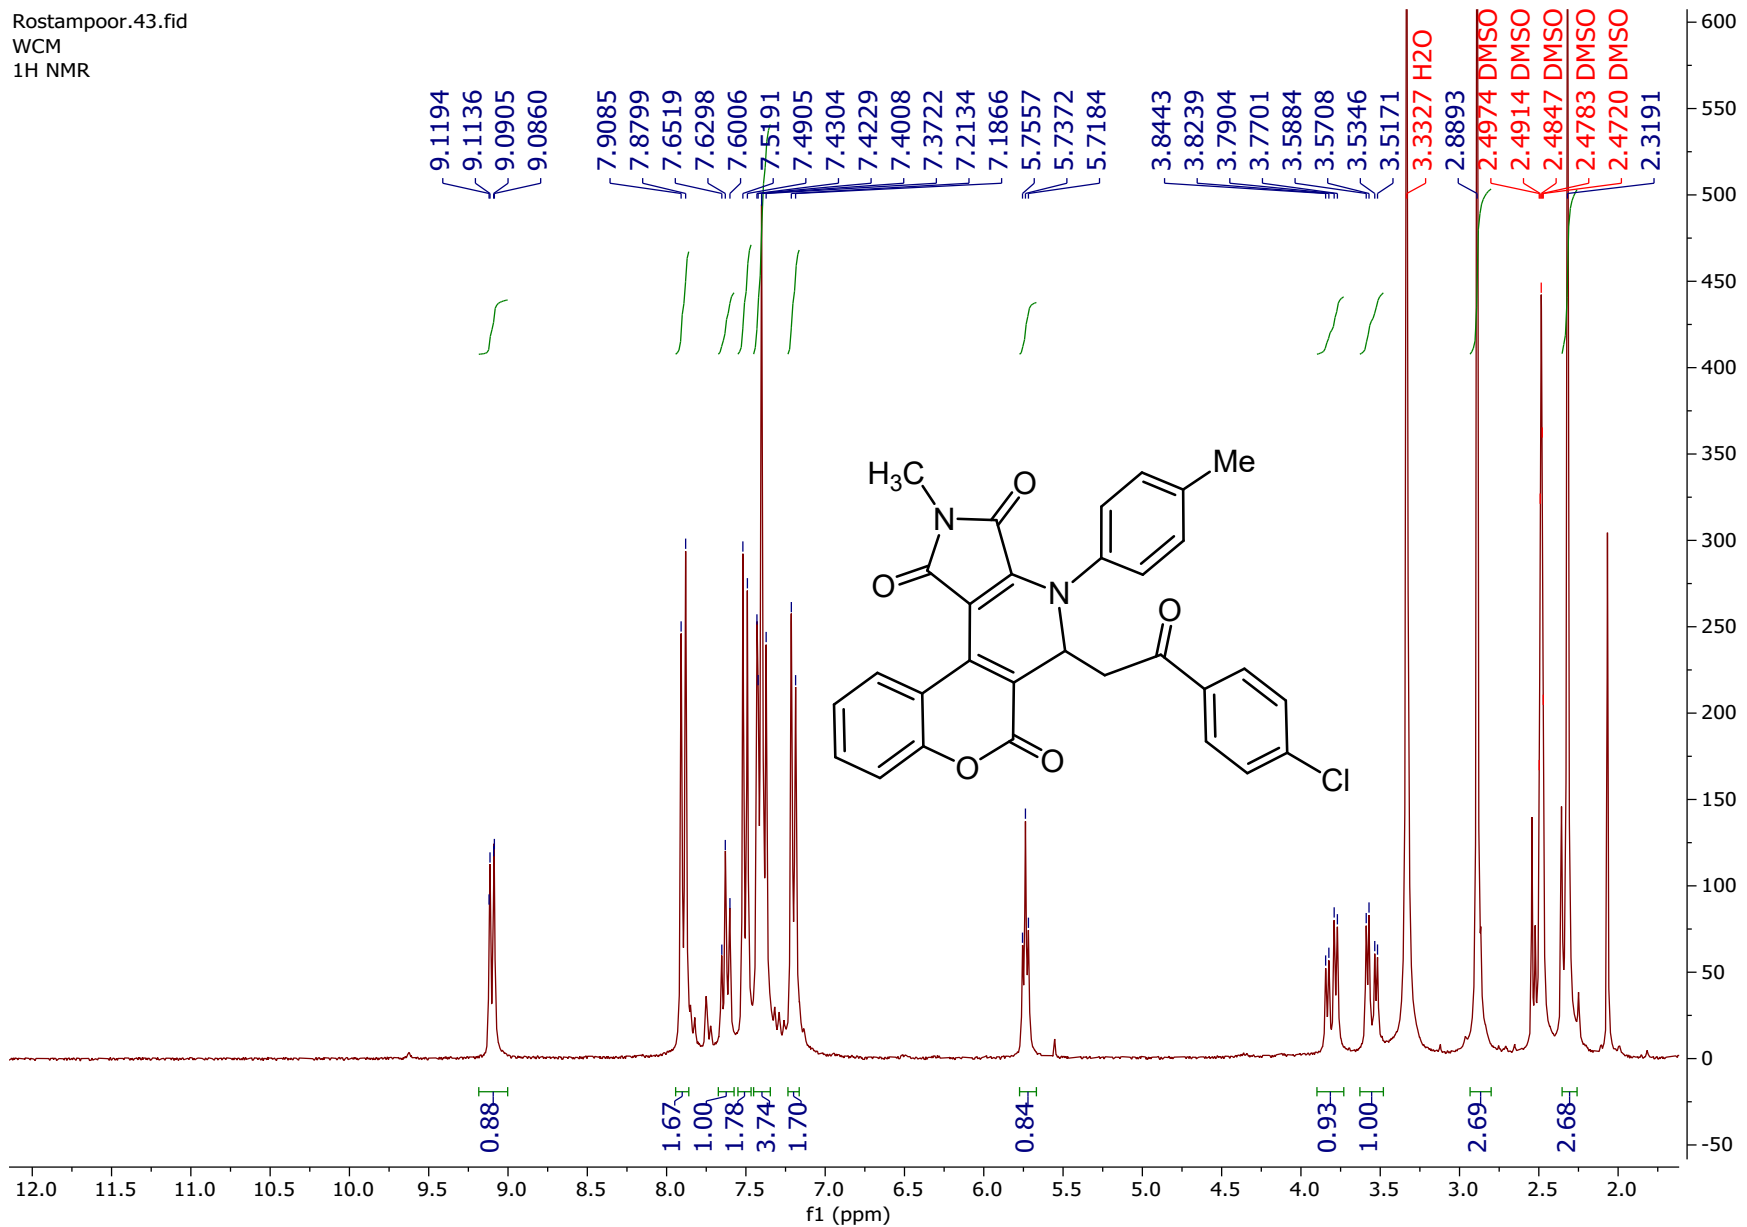

<sup>1</sup>H NMR Spectrum of **3e**



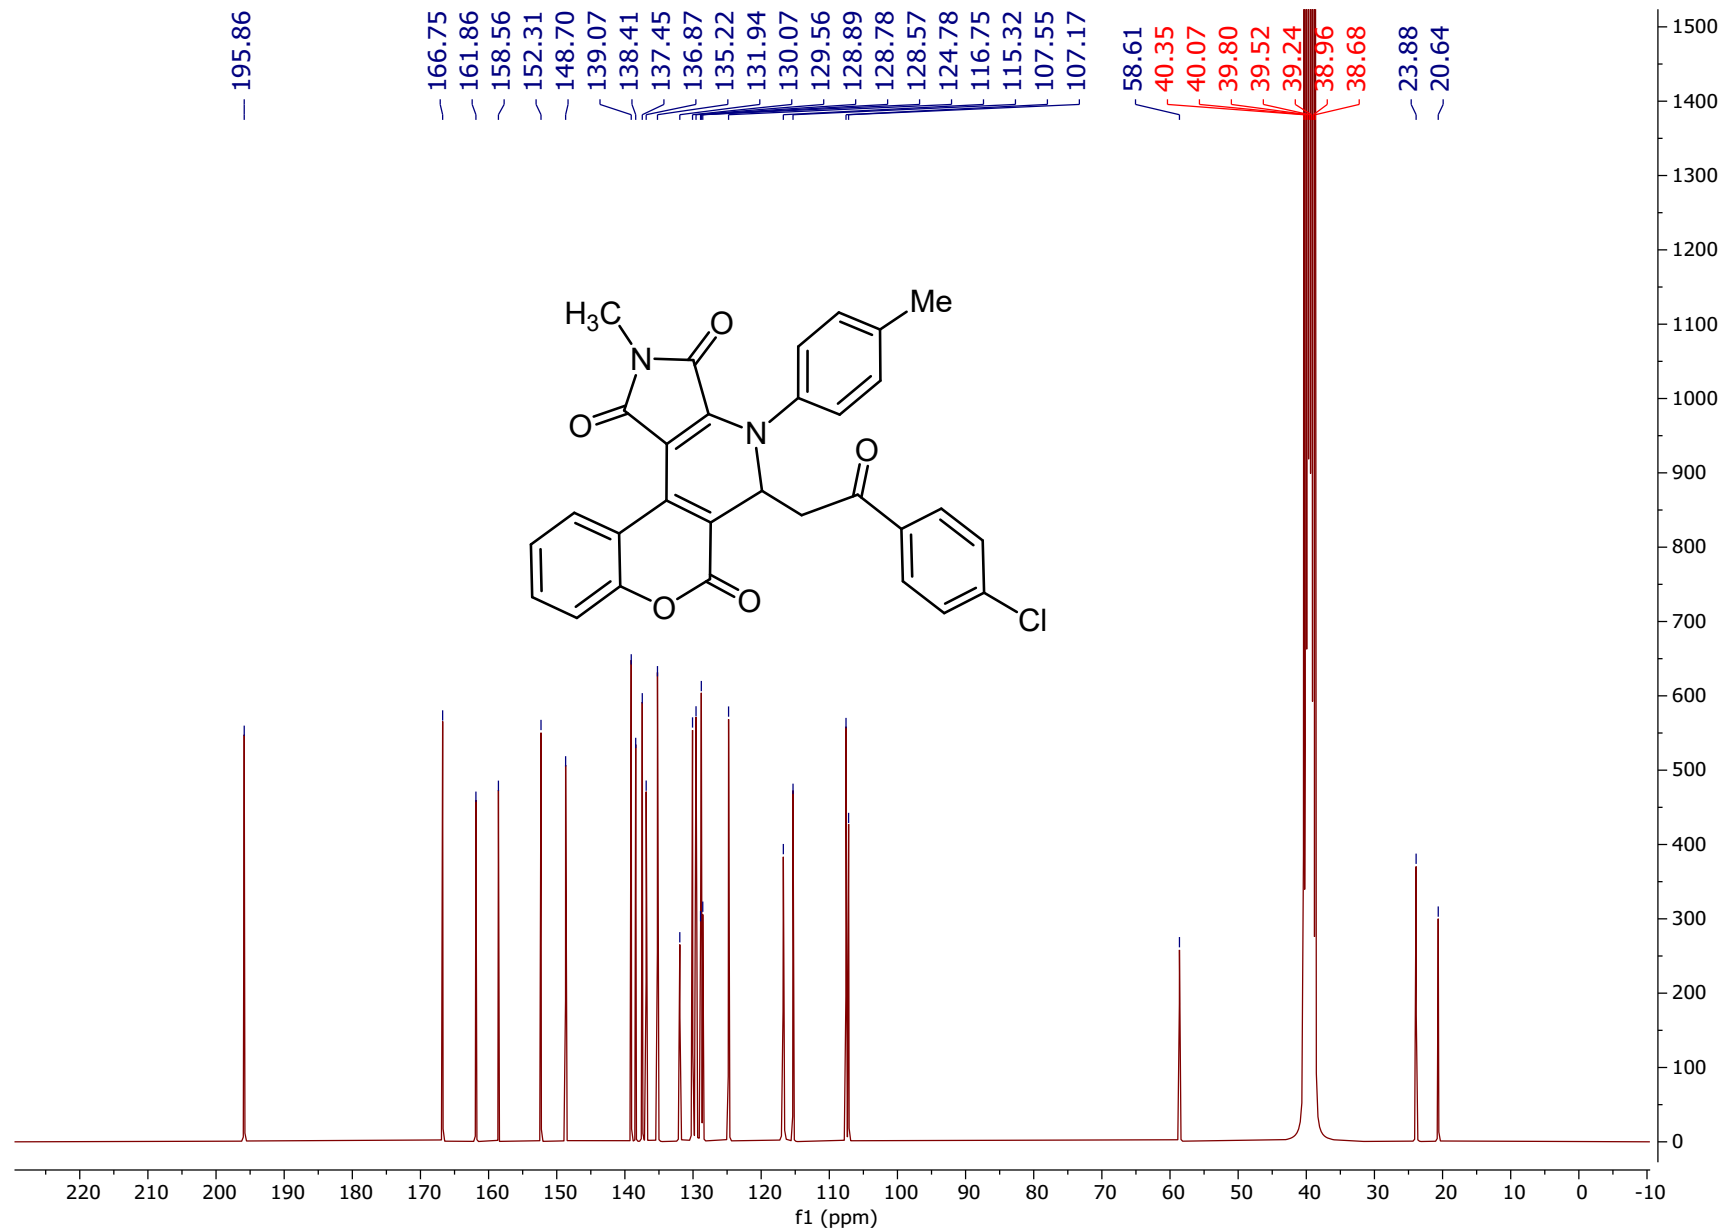

<sup>13</sup>C NMR Spectrum of 3e

S33

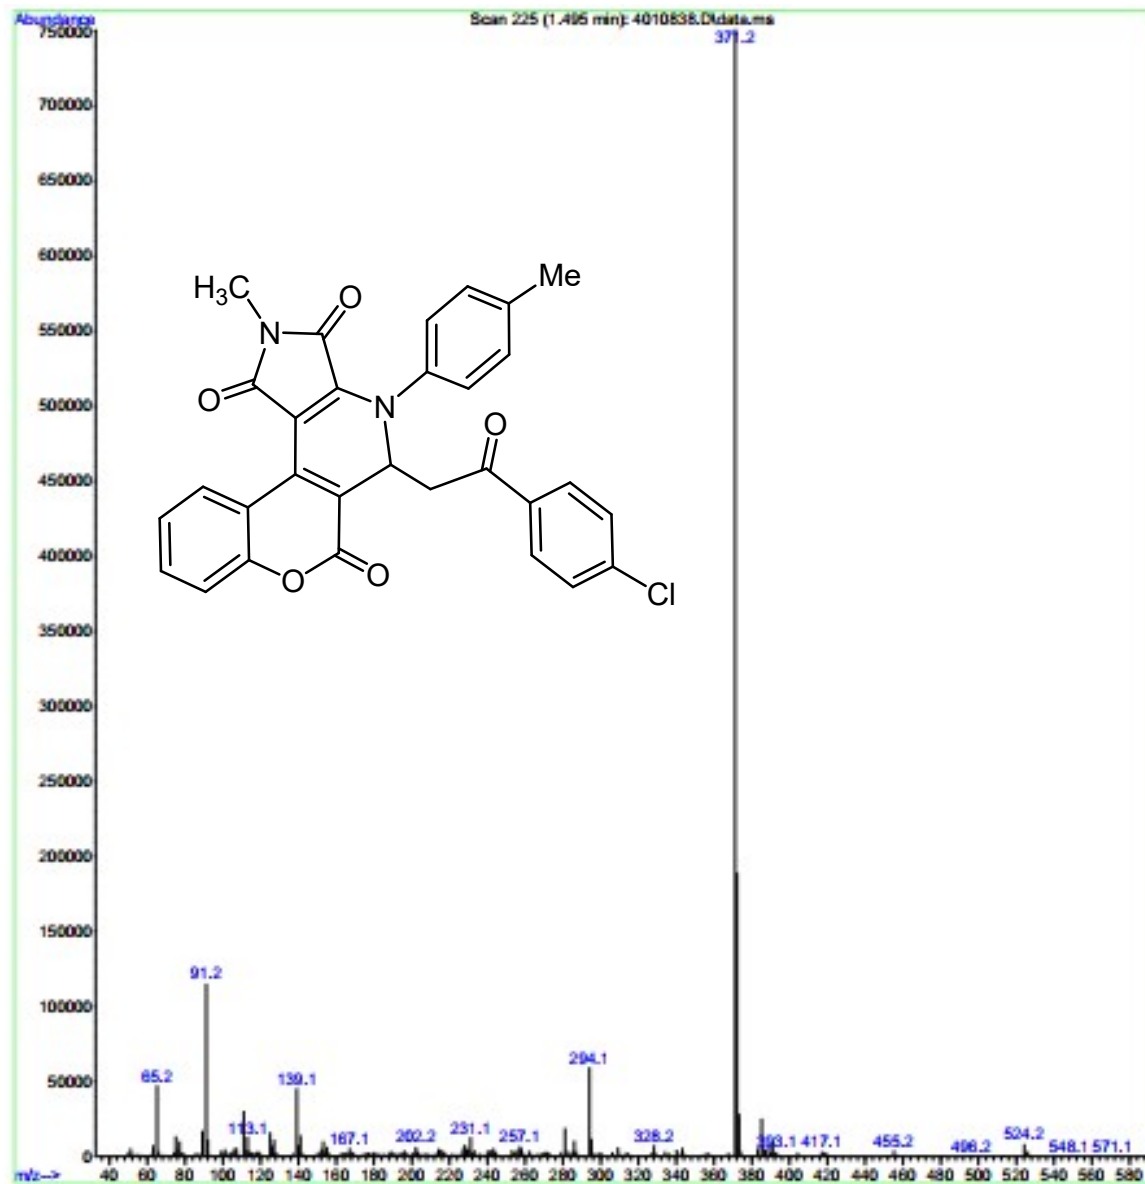

Mass spectrum of **3e**

S34

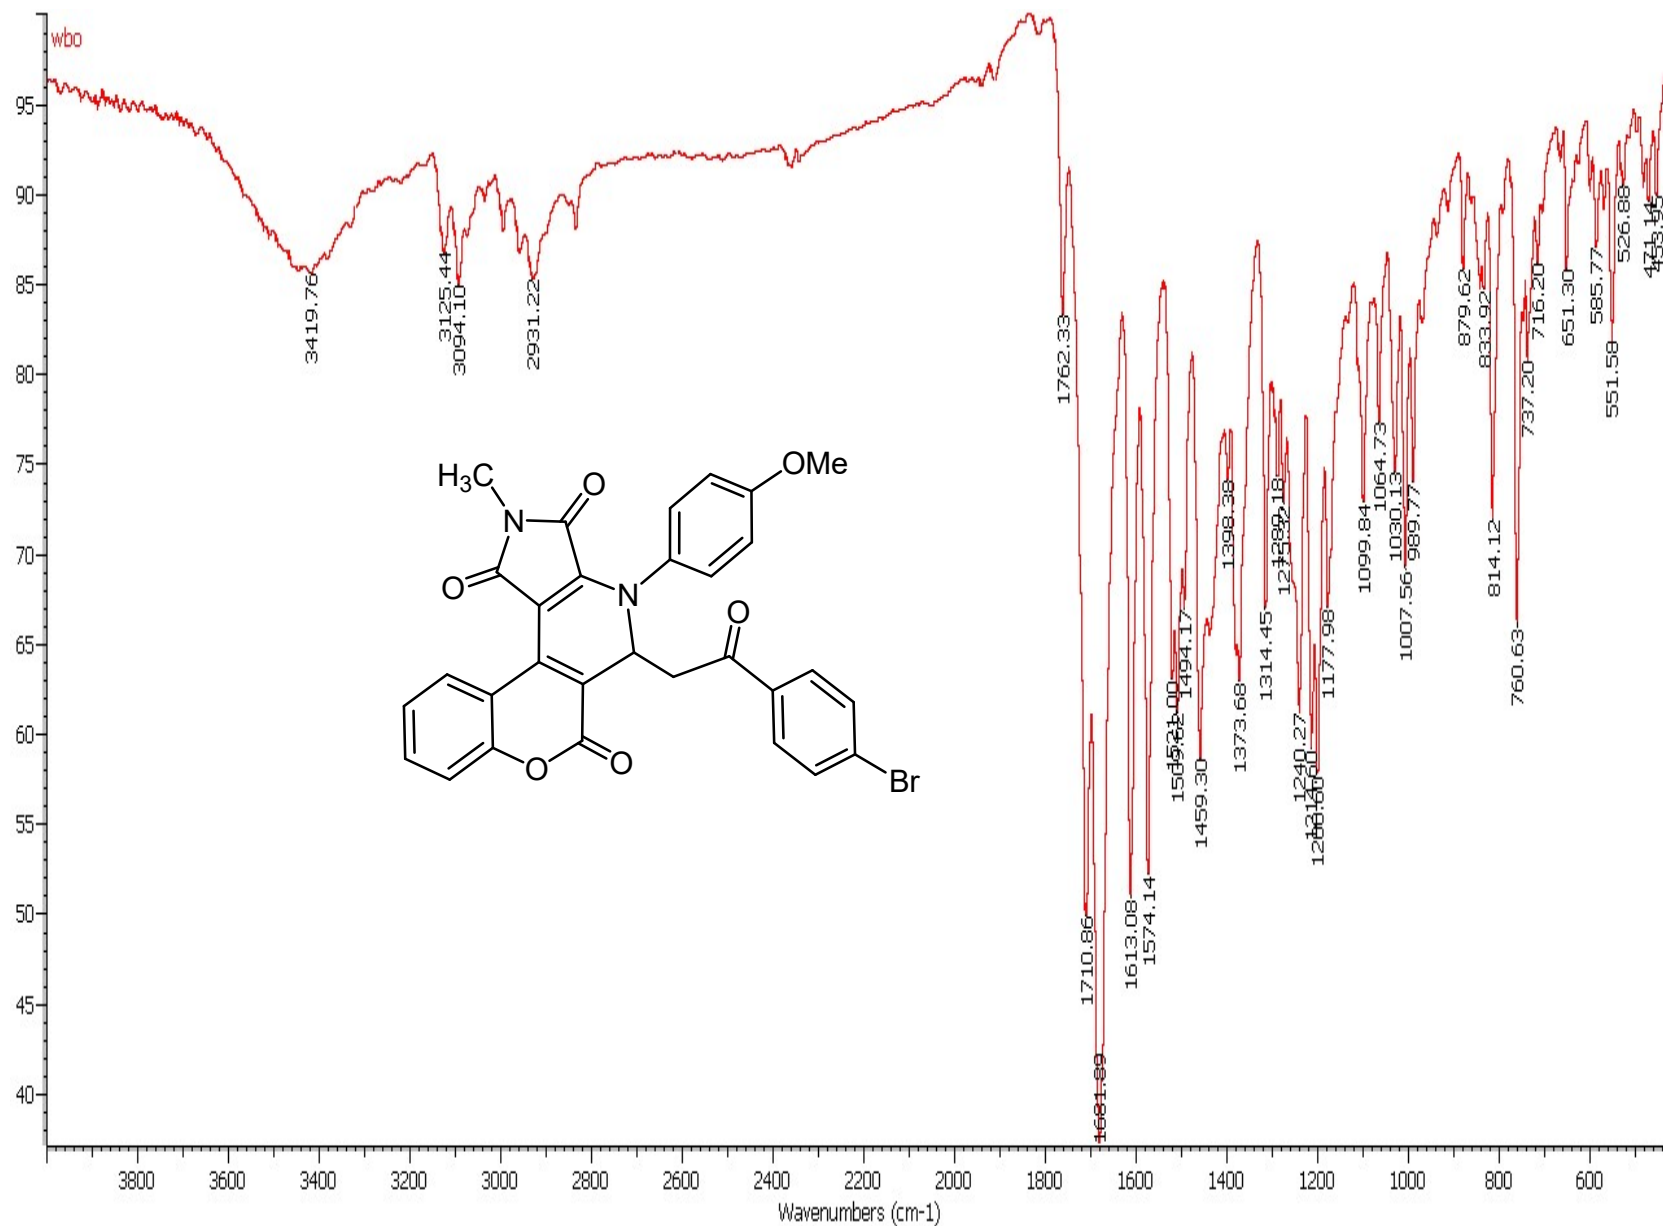

IR spectrum of 3f

Rostampoor.34.fid  
WBO  
1H NMR

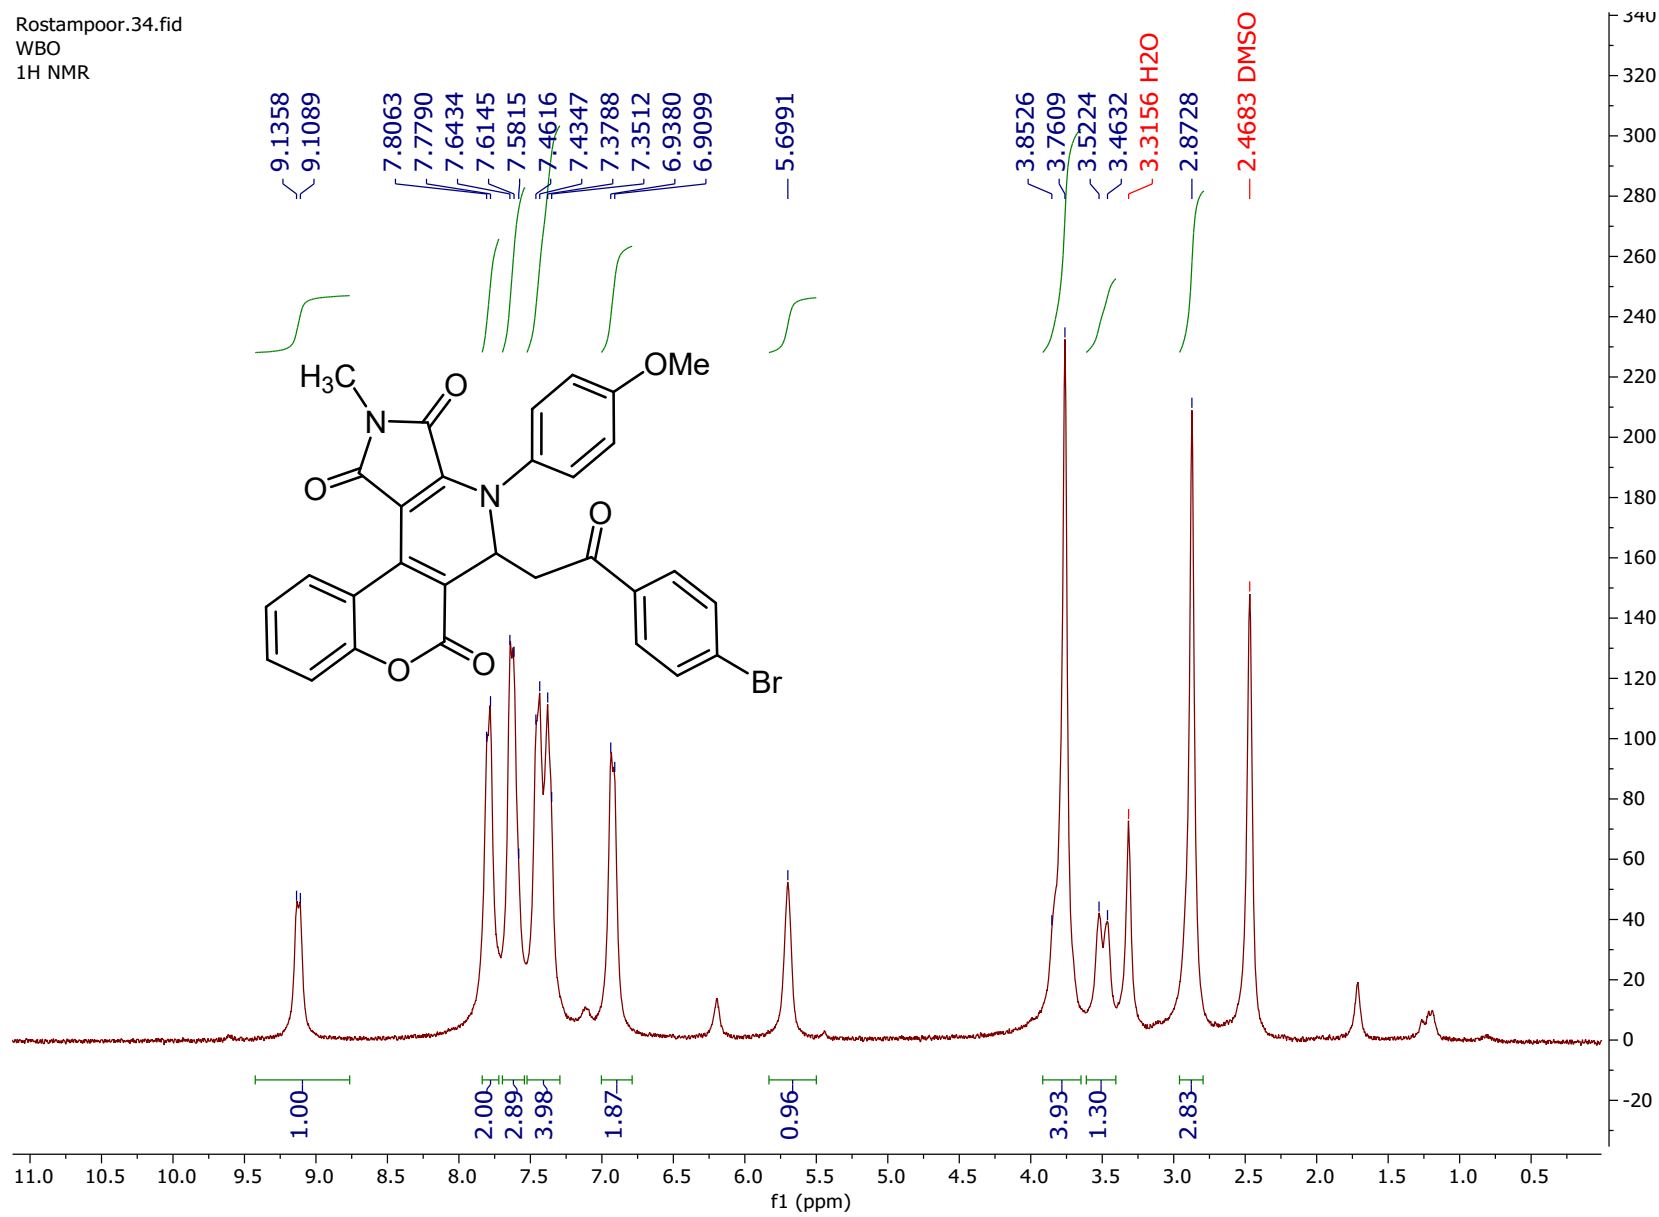

<sup>1</sup>H NMR Spectrum of **3f**

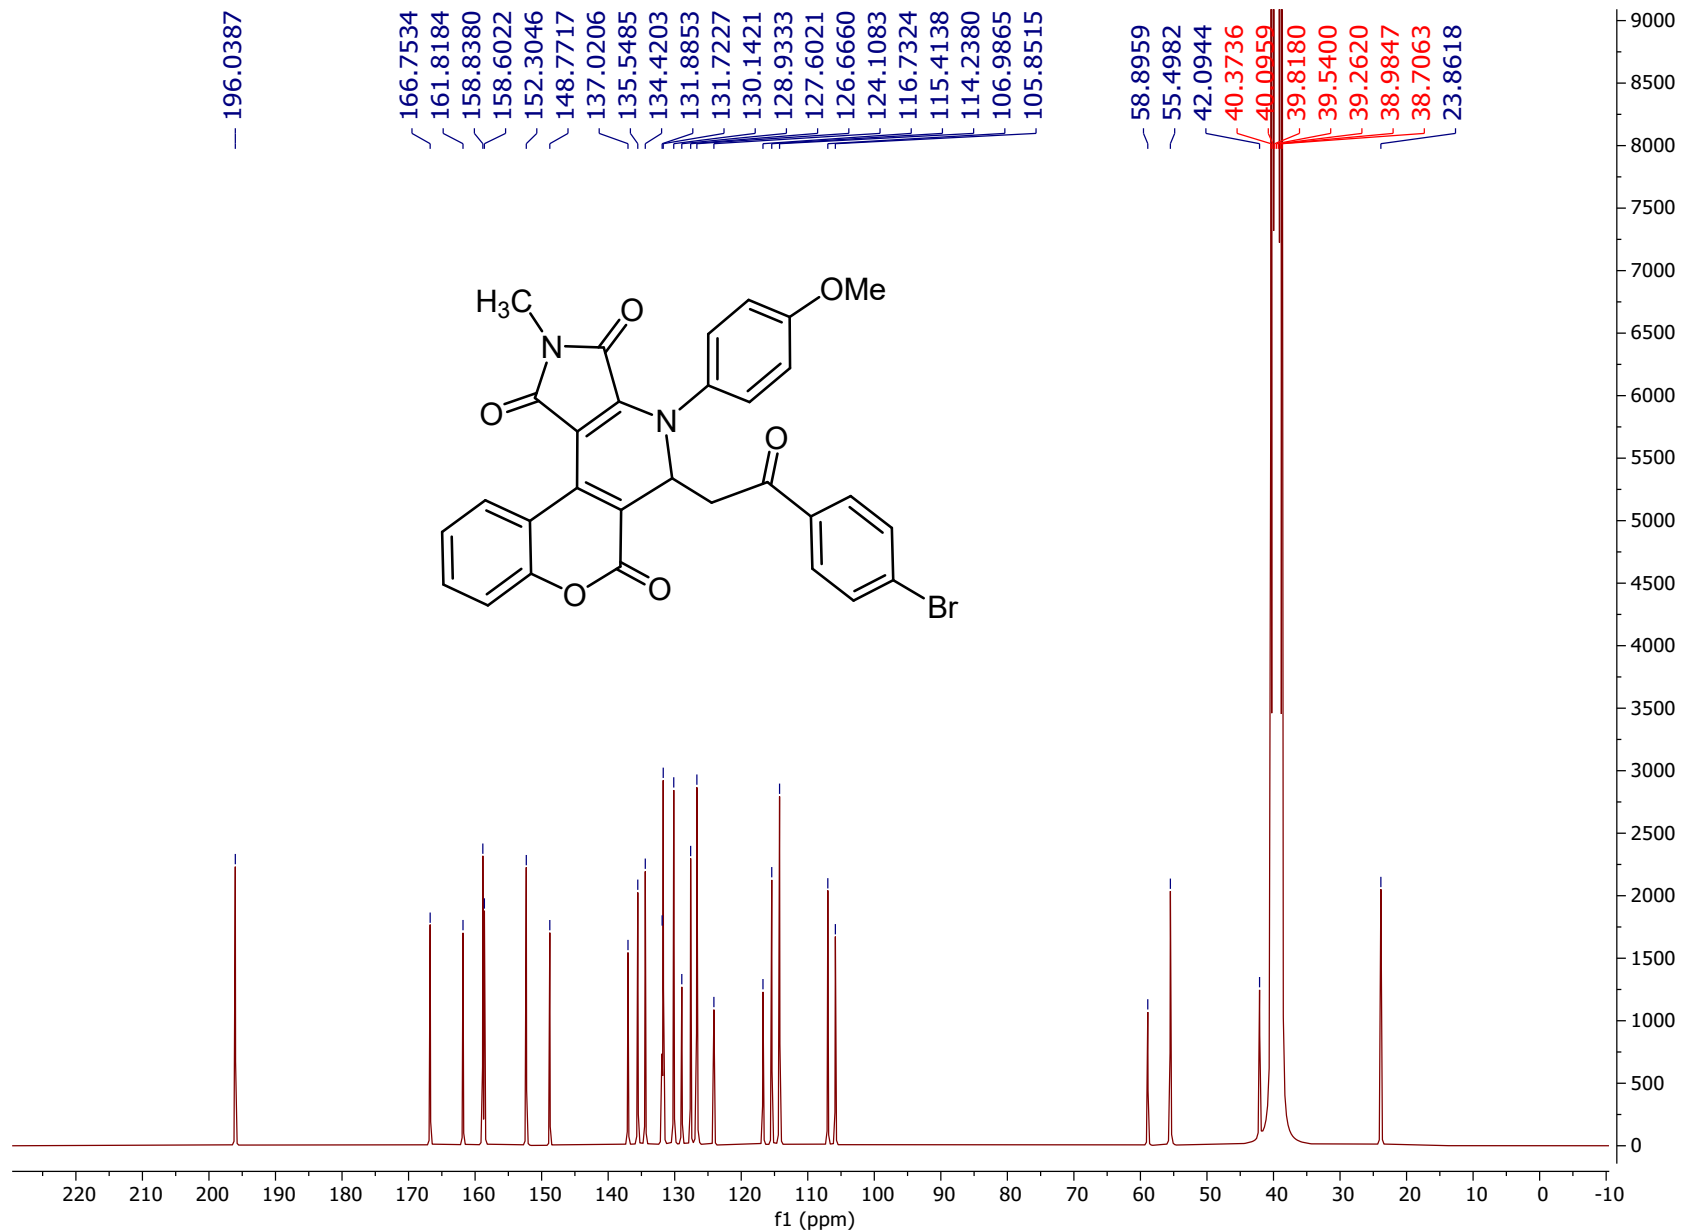

$^{13}\text{C}$  NMR Spectrum of **3f**

S37

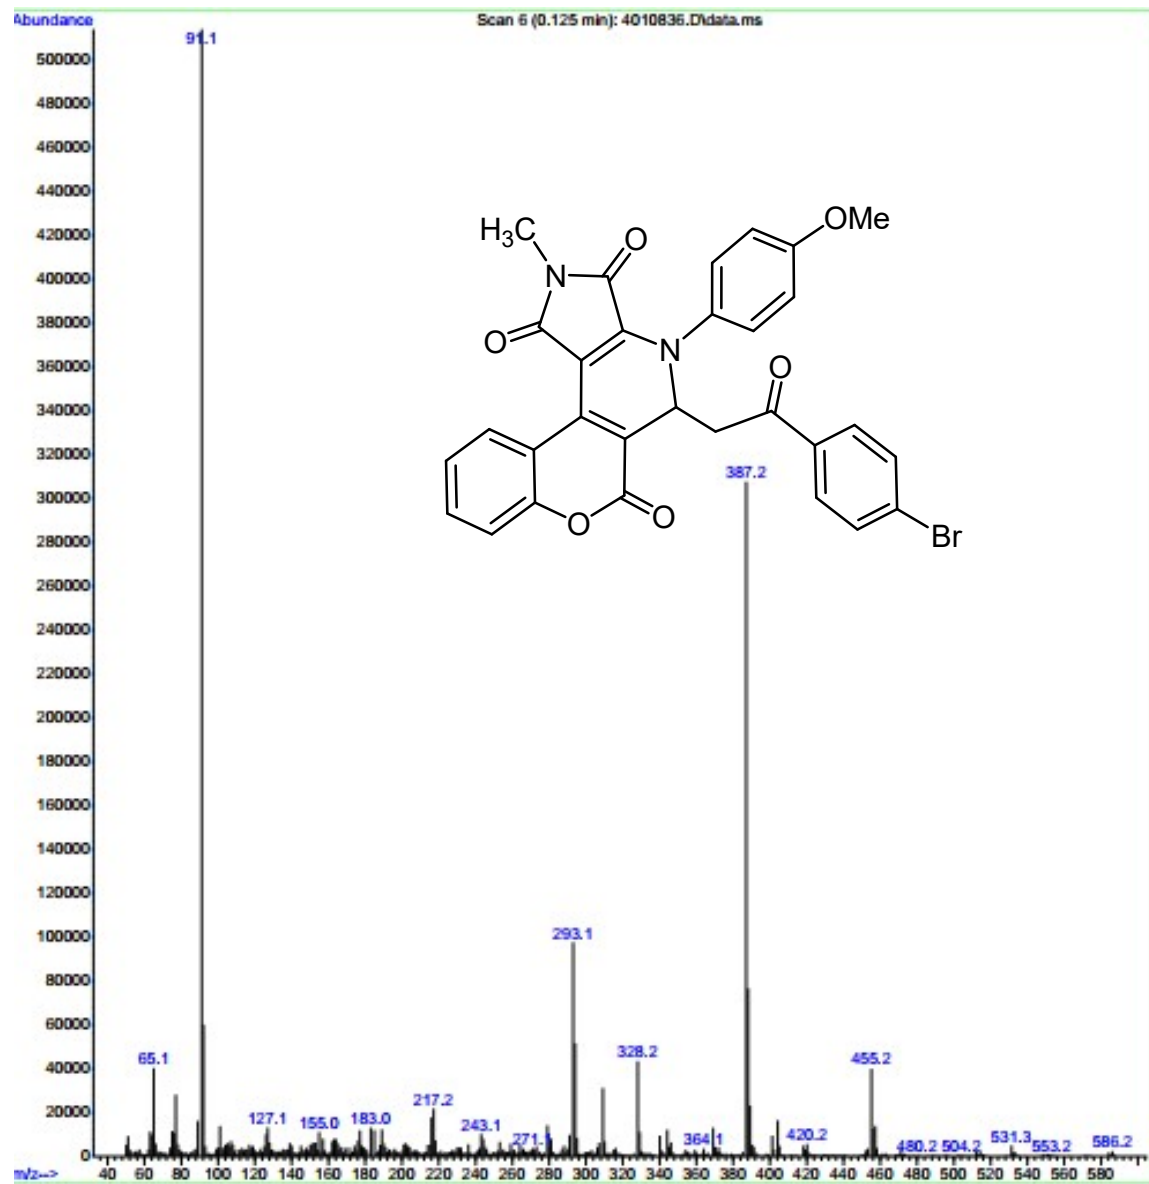

Mass spectrum of 3f

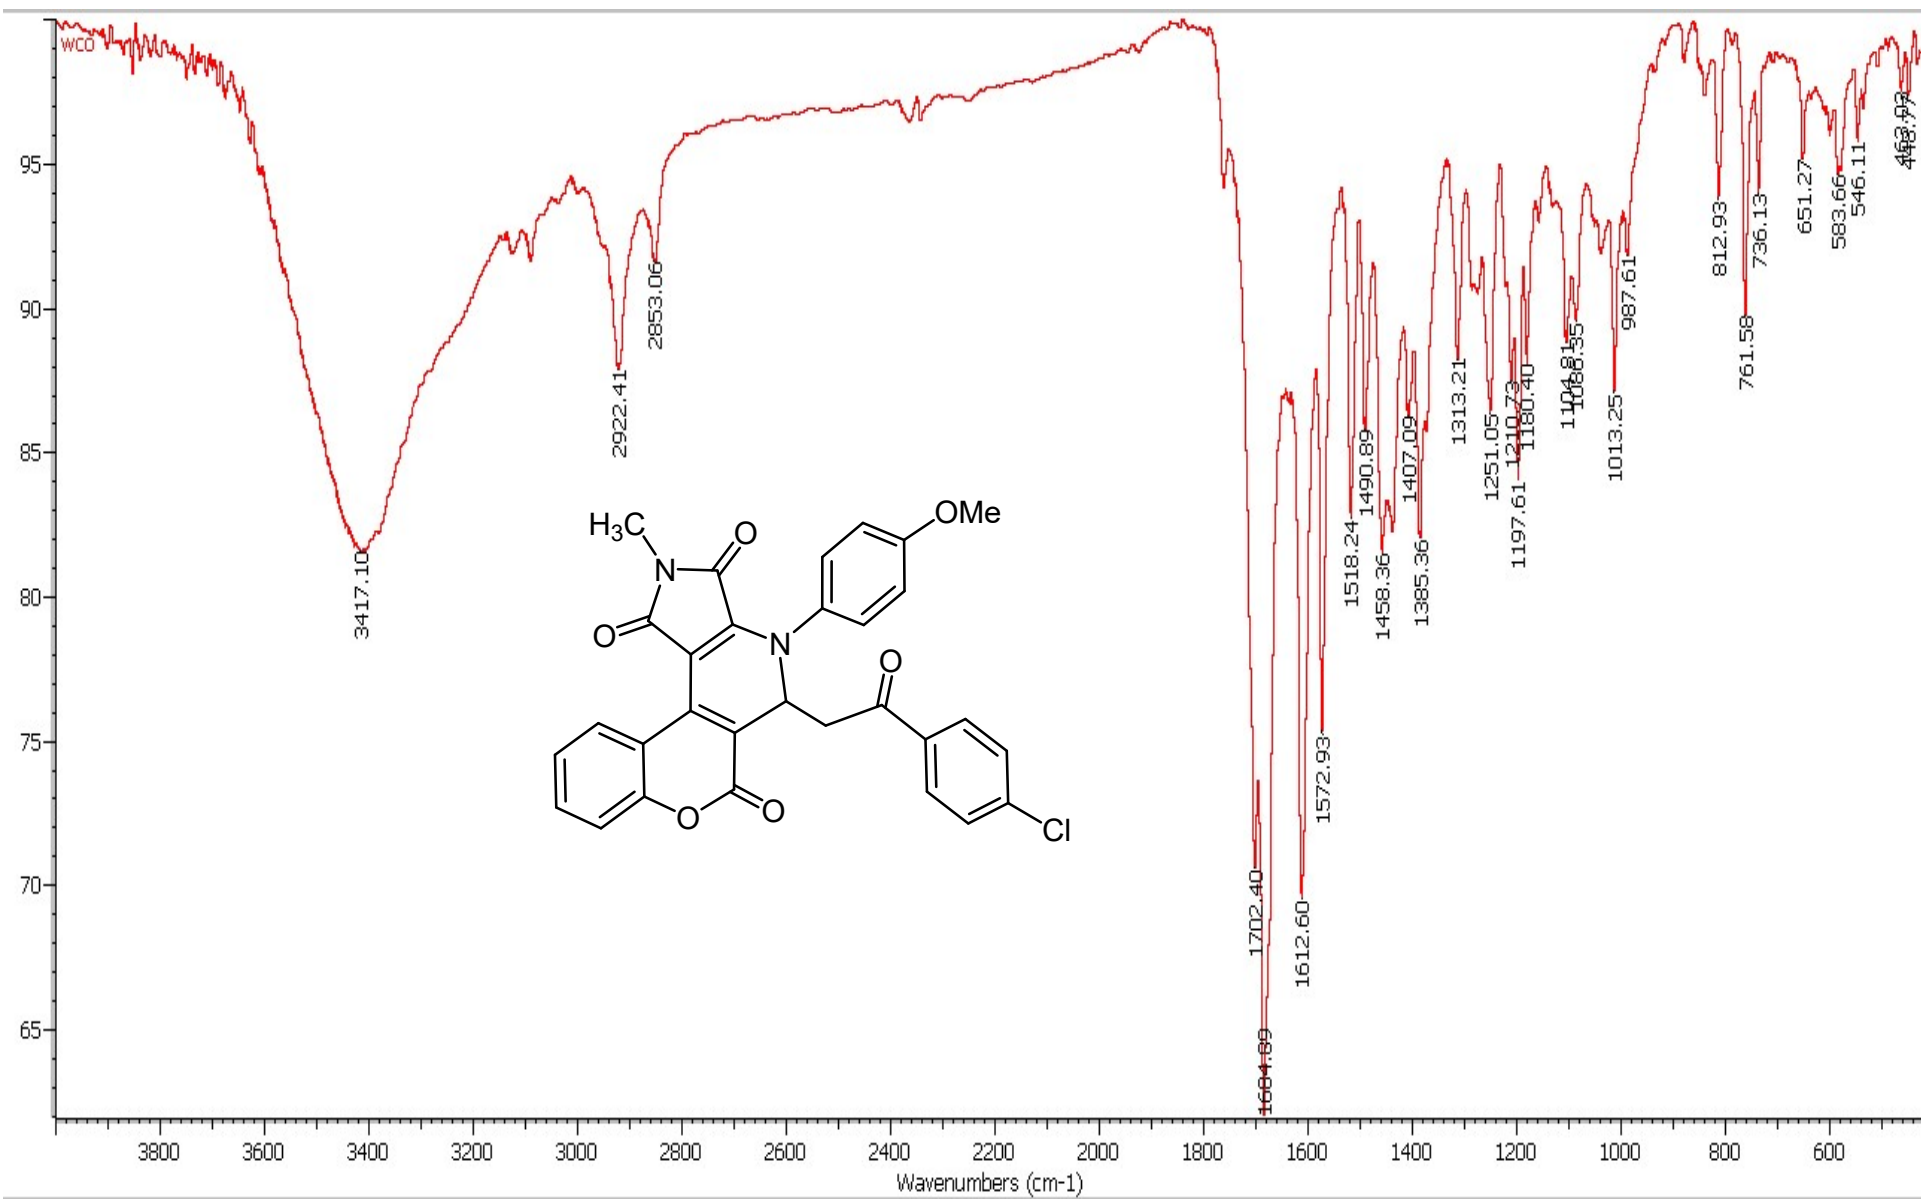

IR spectrum of **3g**

Rostampoor.22.fid  
WCO  
1H NMR

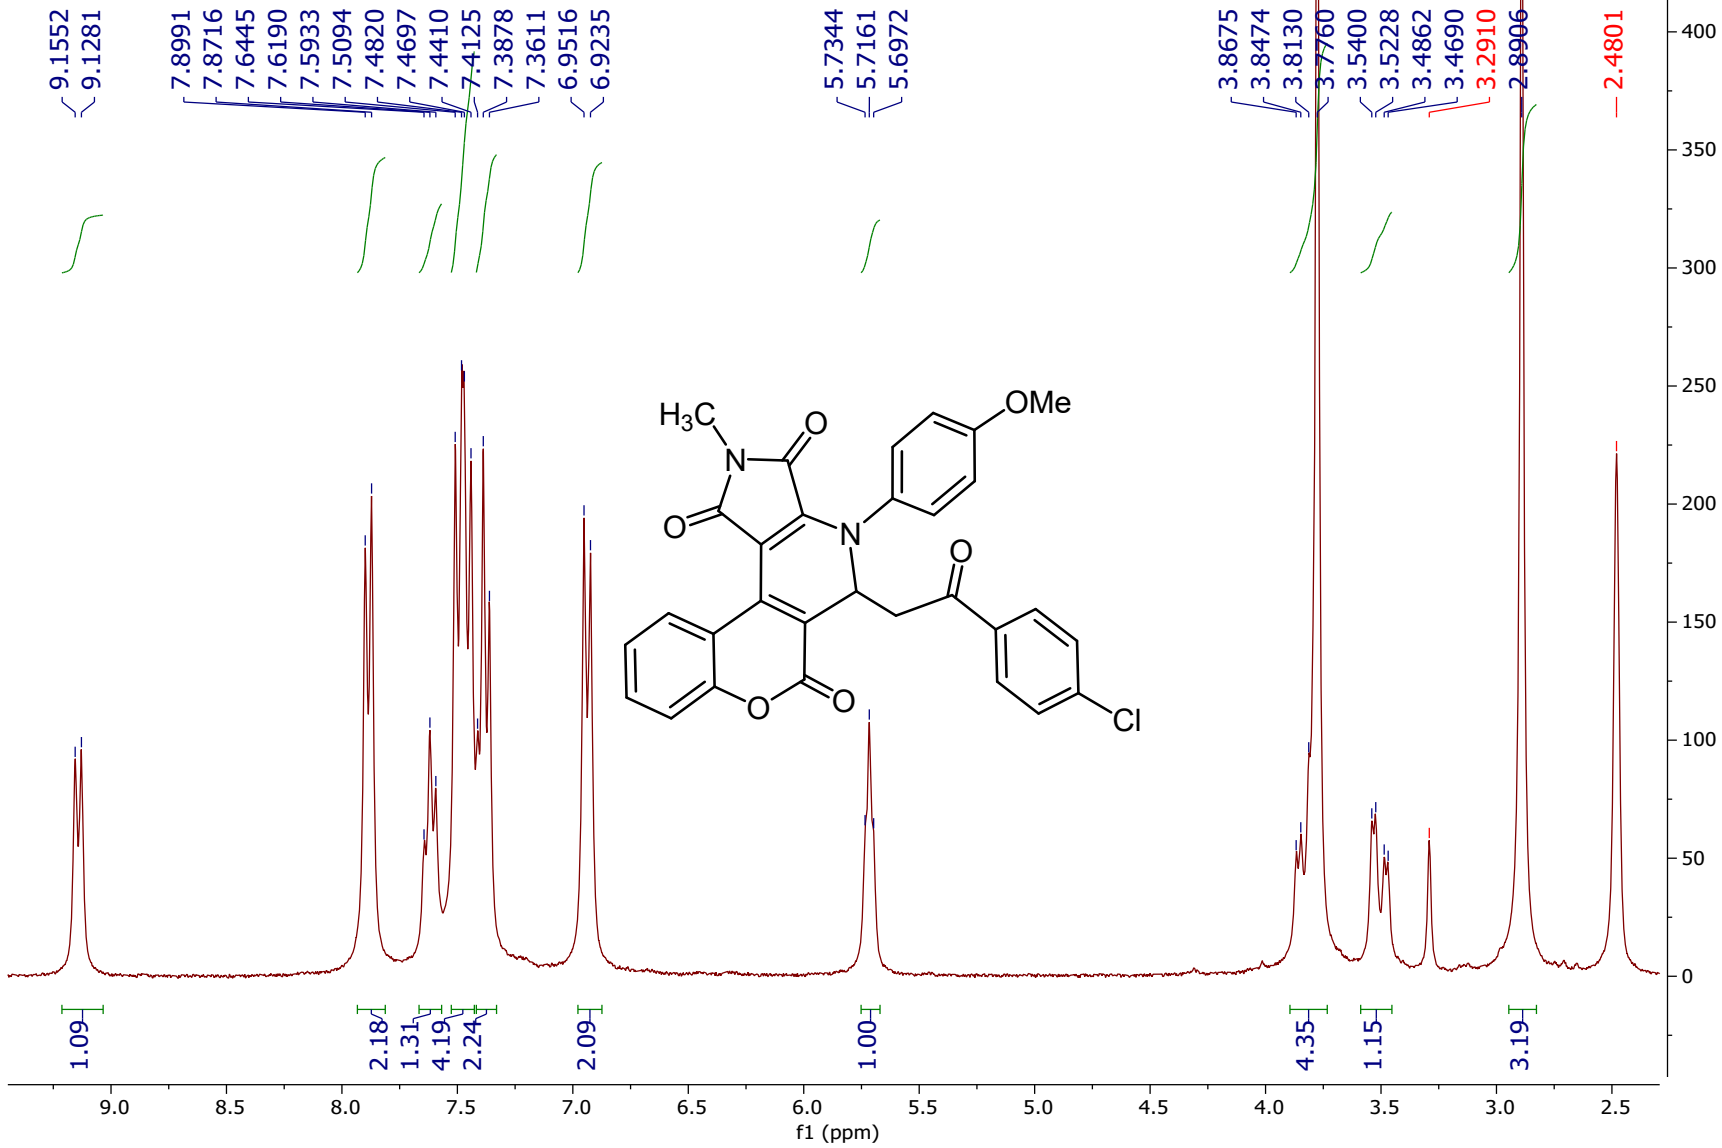

<sup>1</sup>H NMR Spectrum of 3g



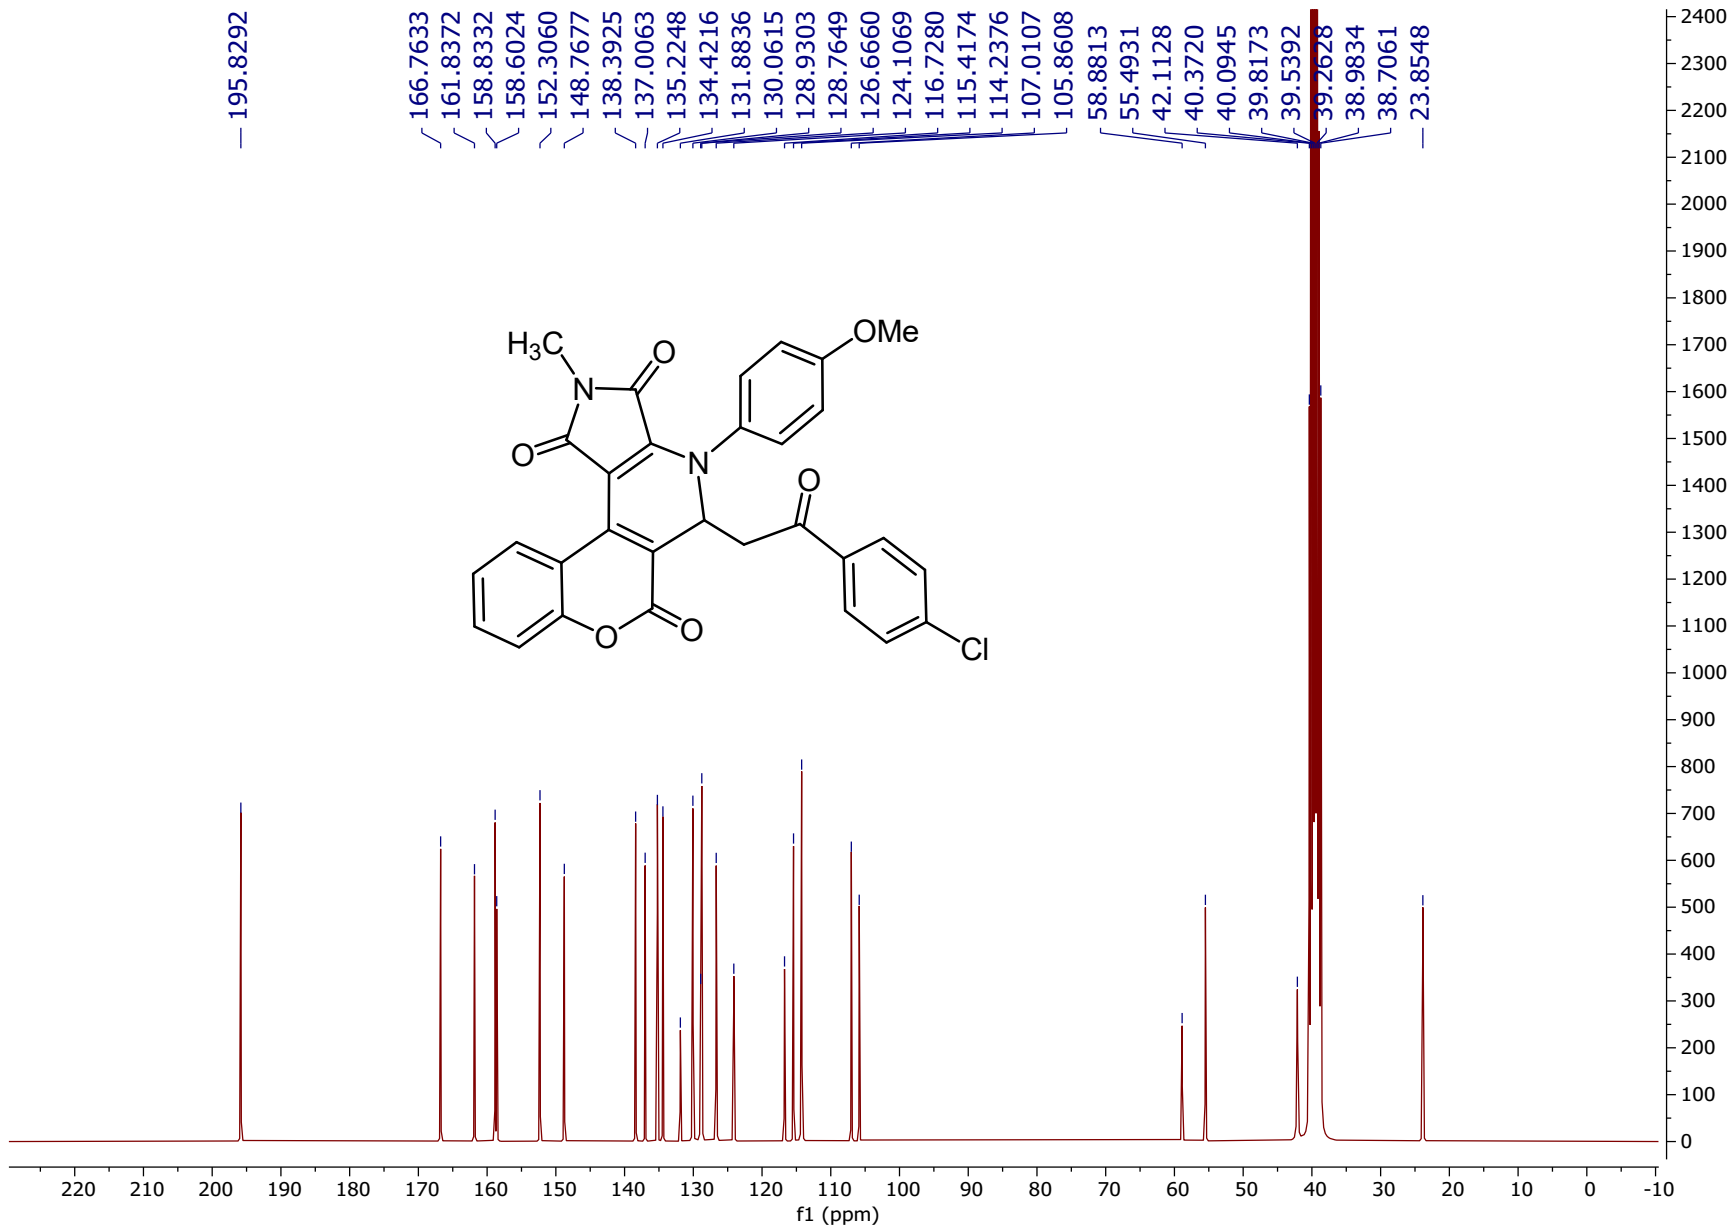

<sup>13</sup>C NMR Spectrum of **3g**

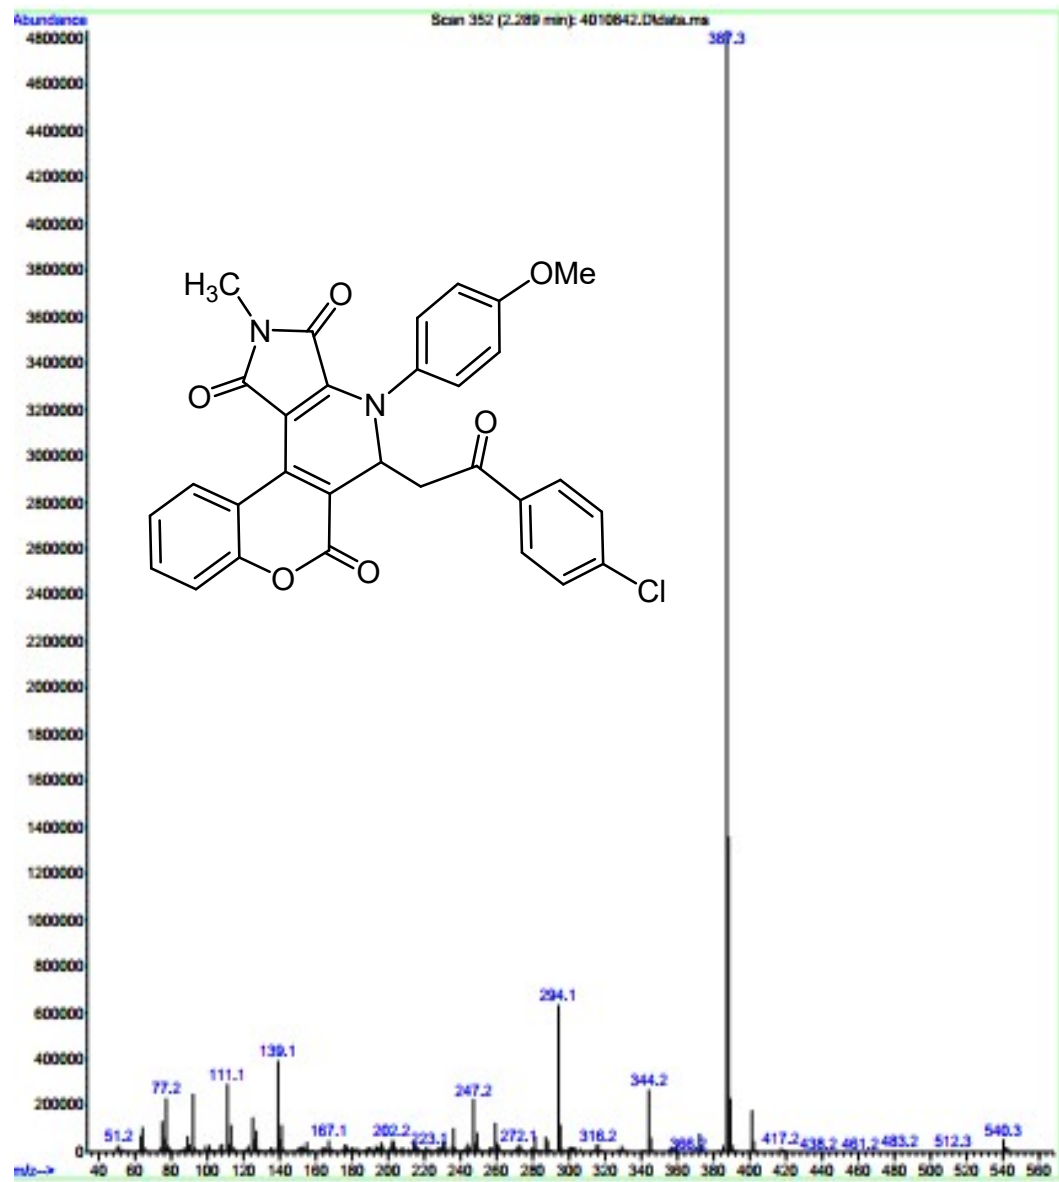

Mass spectrum of 3g

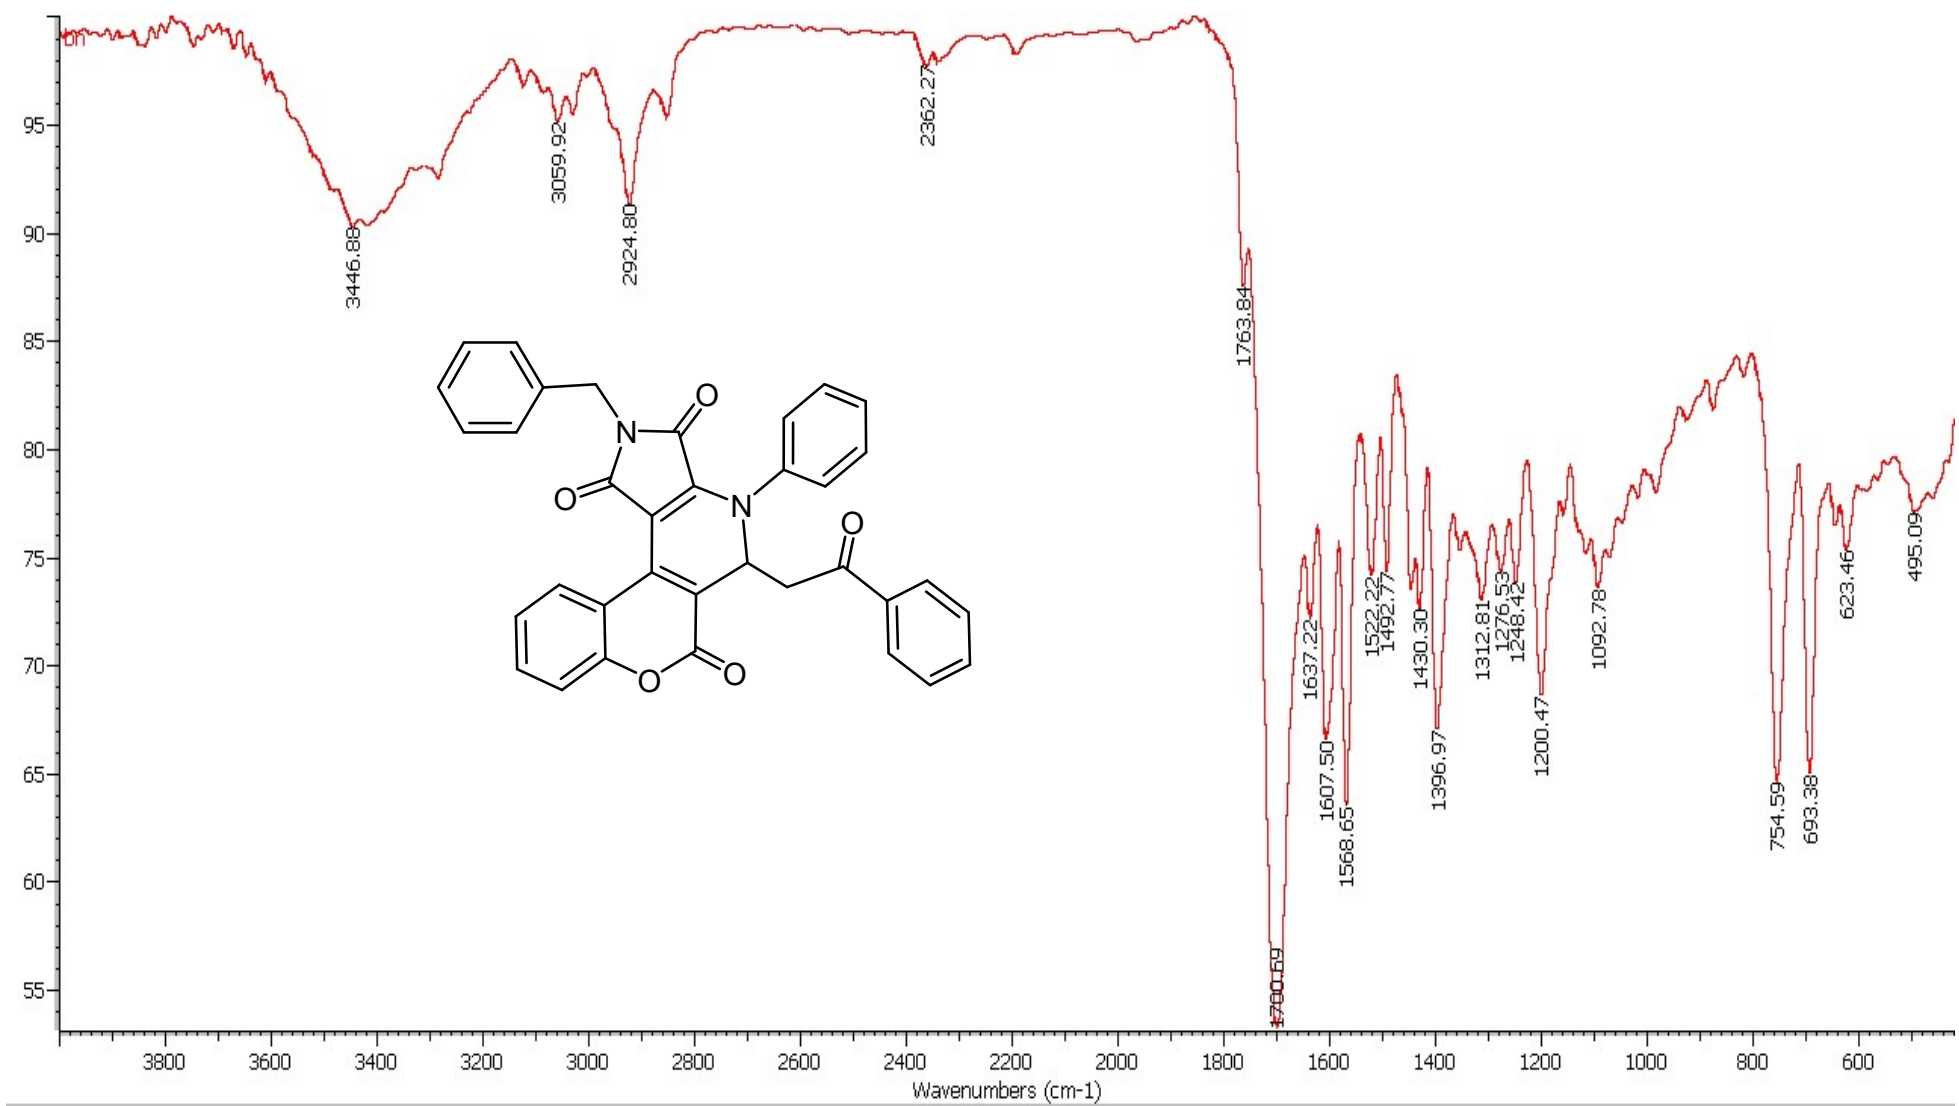

IR spectrum of 3h

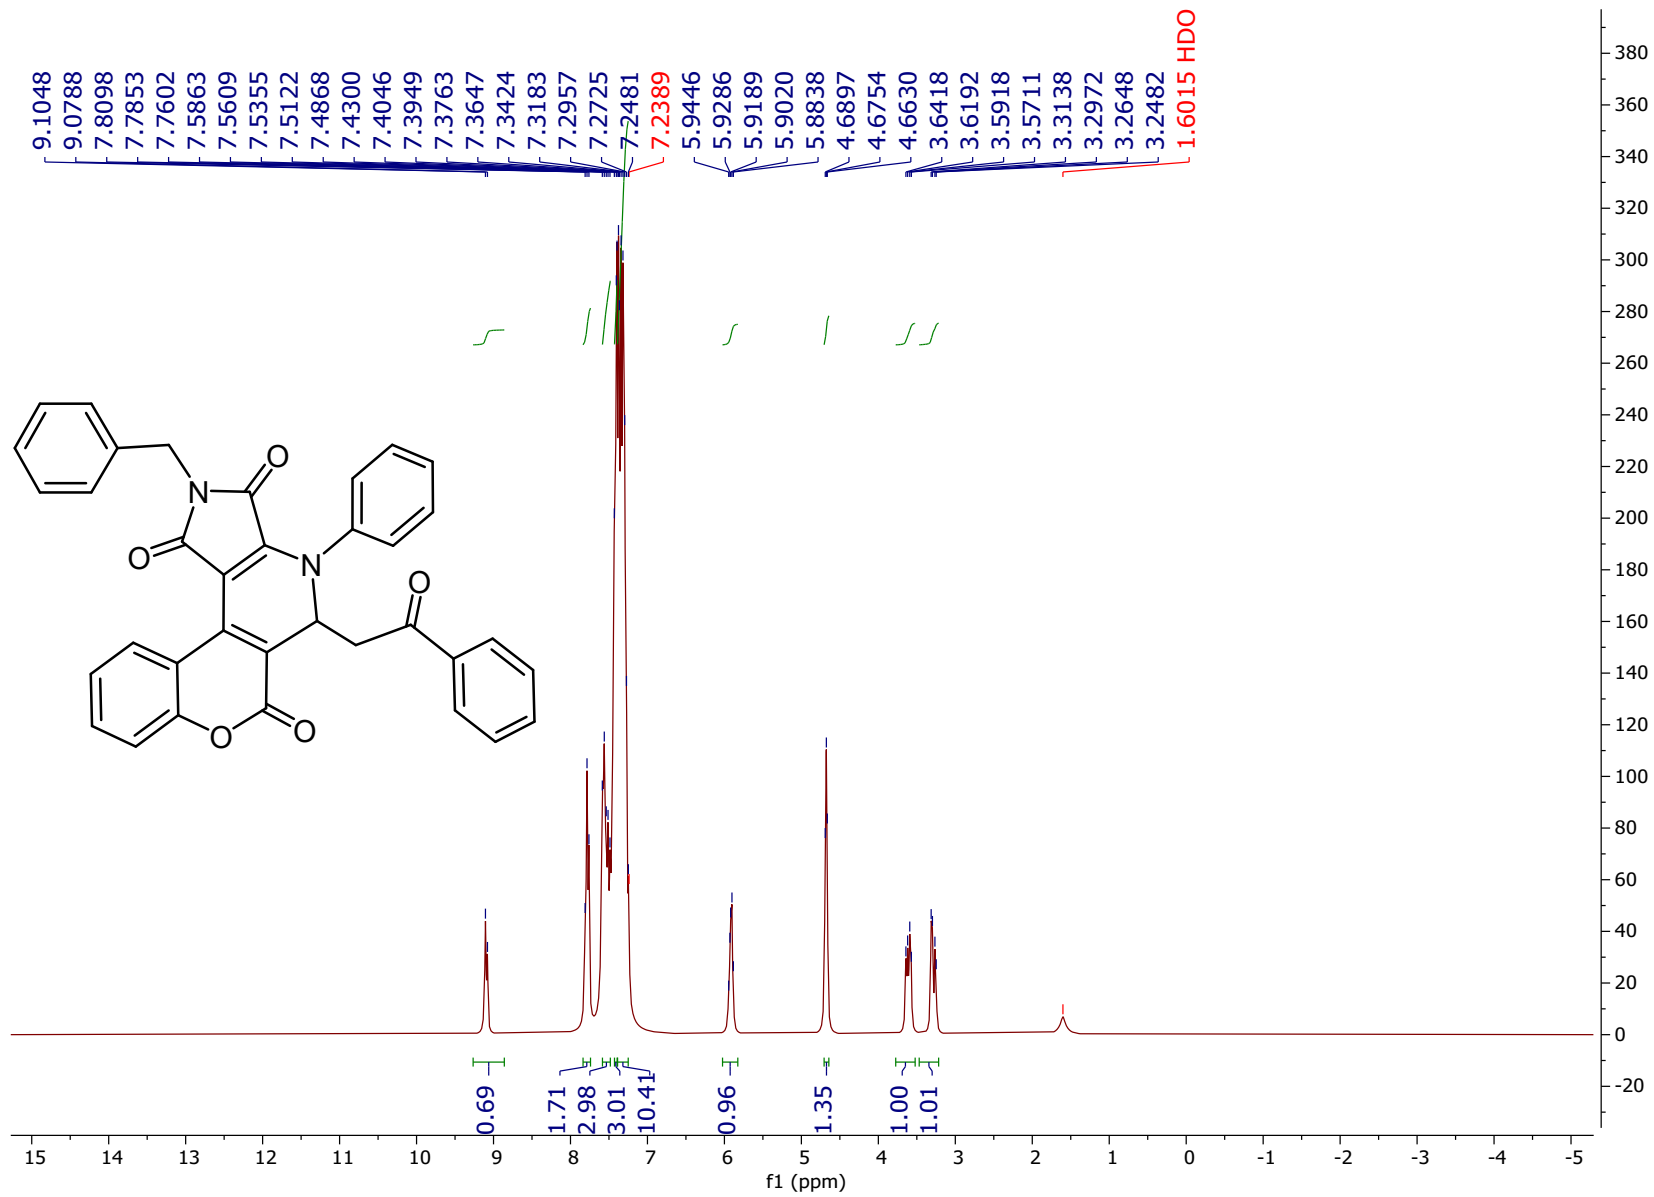

<sup>1</sup>H NMR Spectrum of **3h**

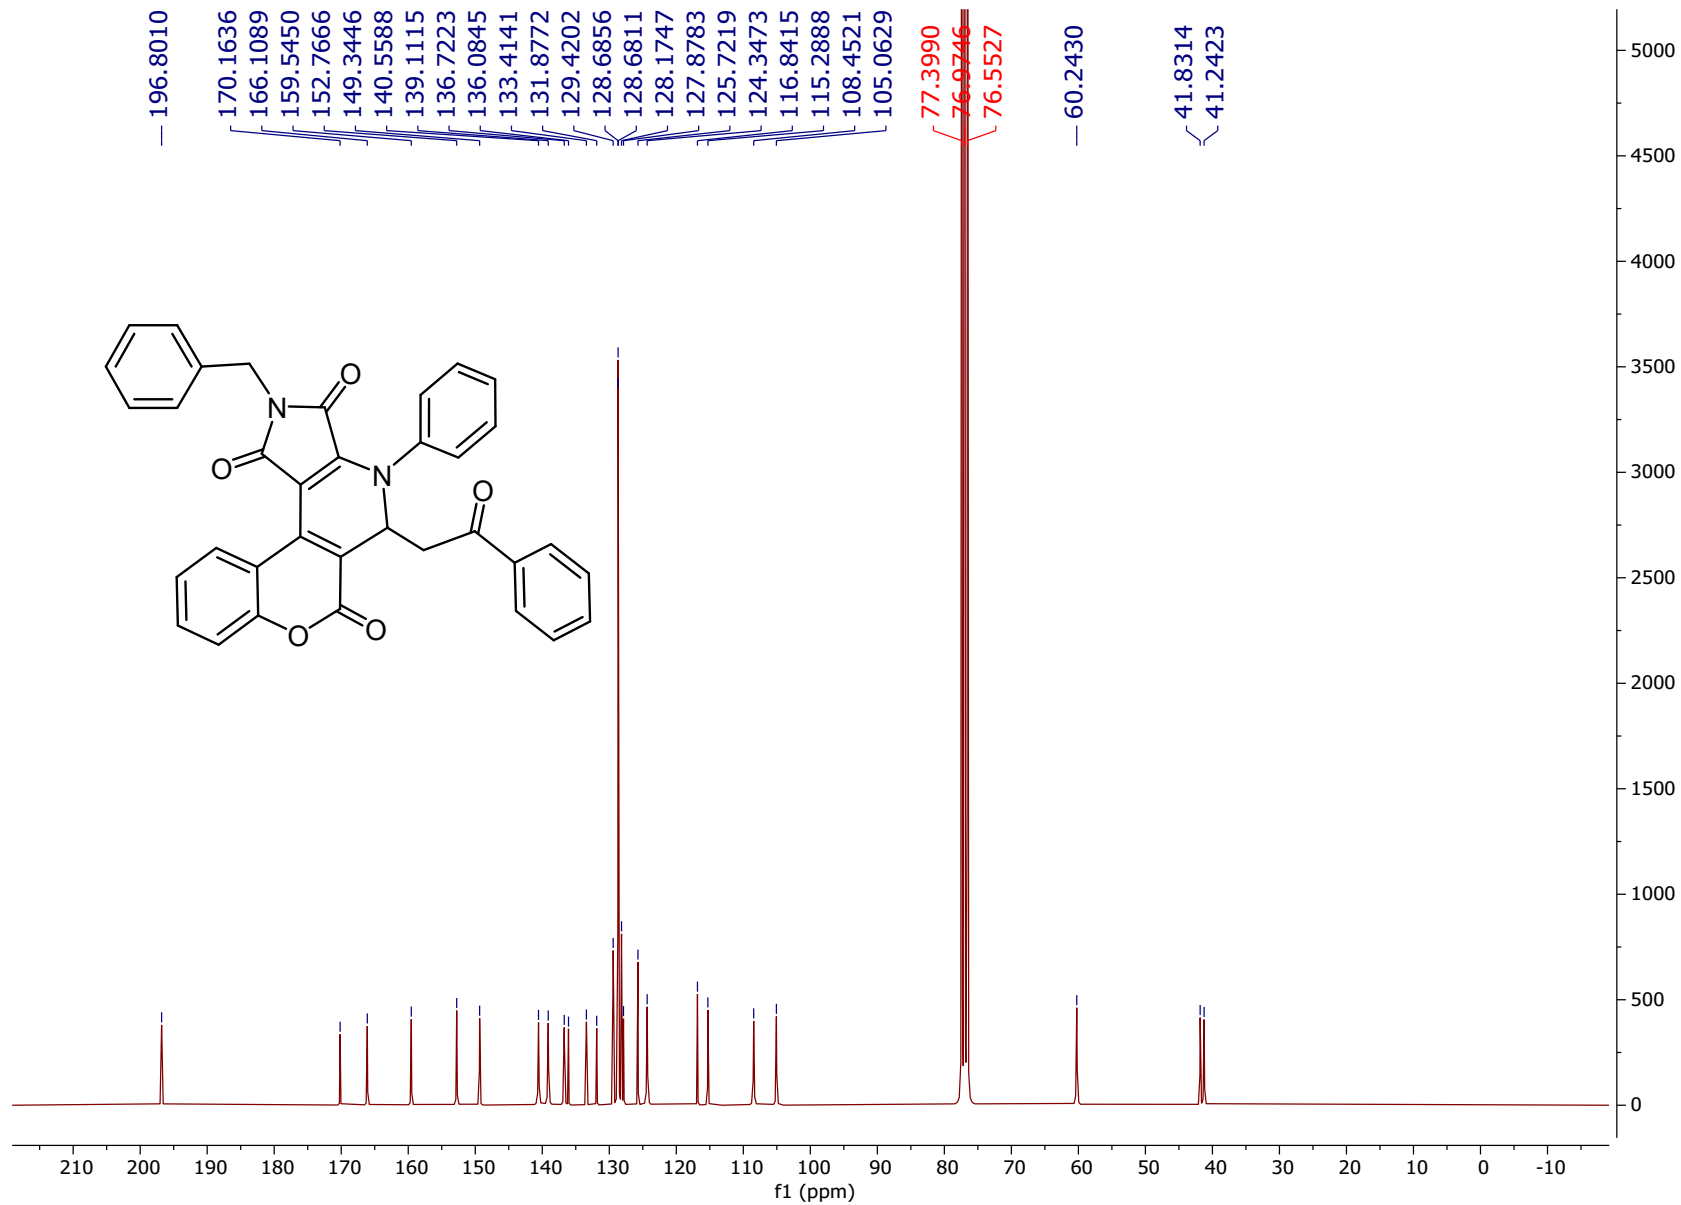

<sup>13</sup>C NMR Spectrum of **3h**

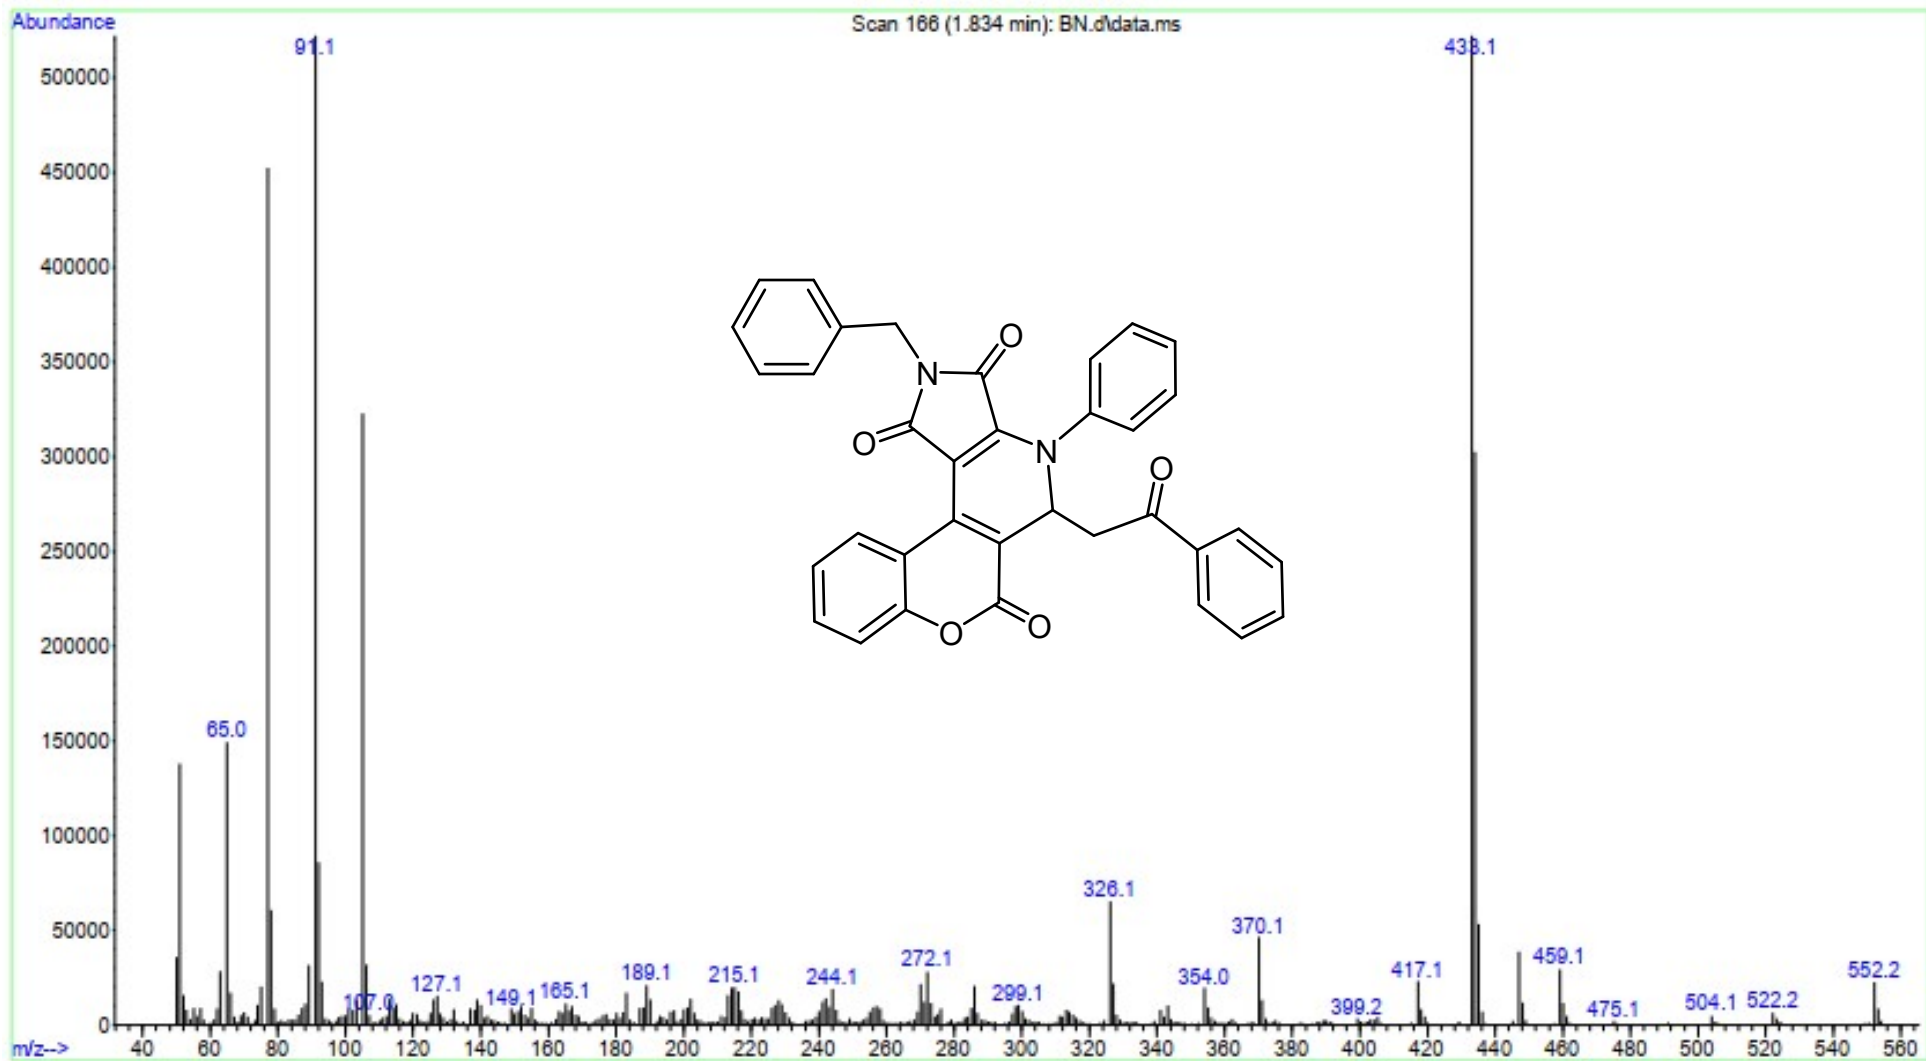

Mass spectrum of **3h**

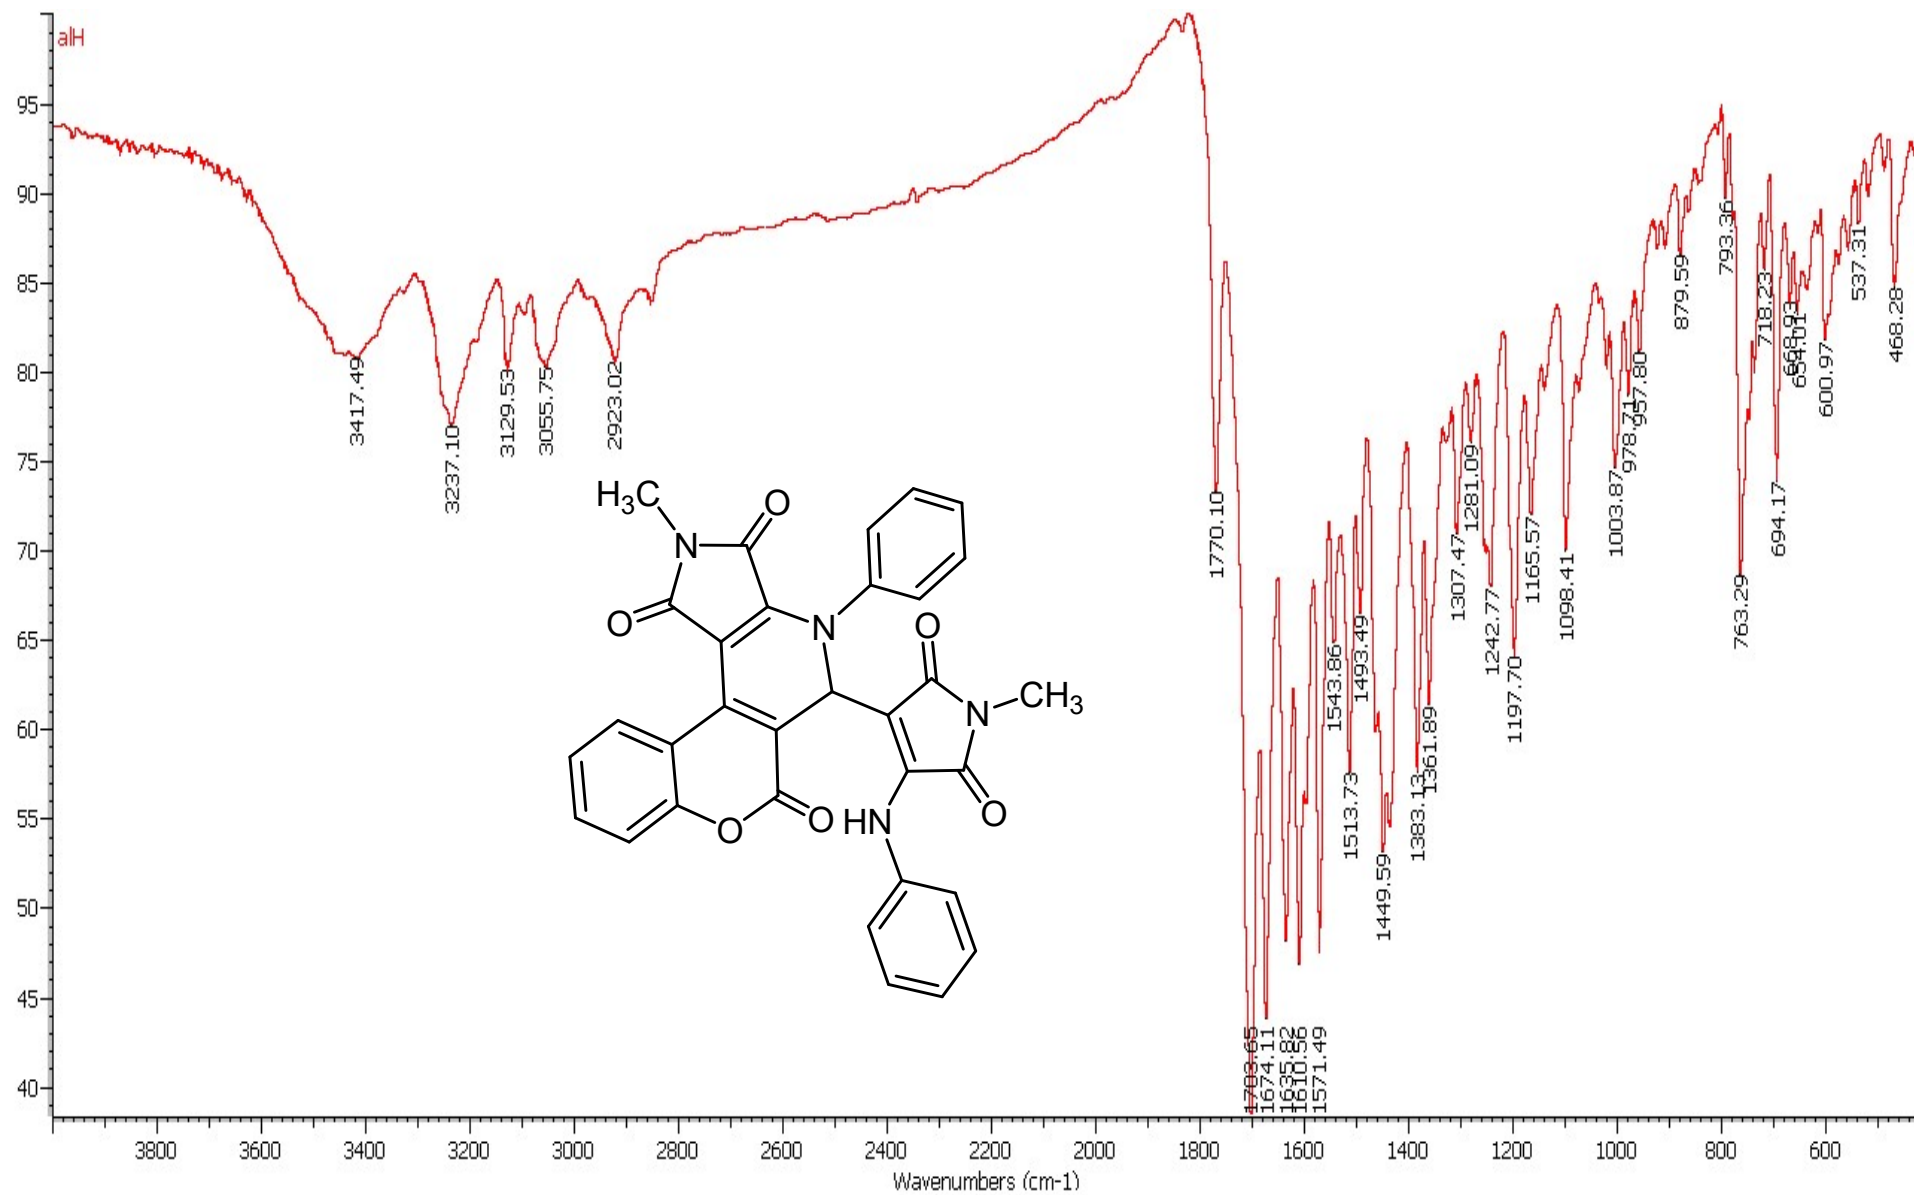

IR spectrum of 3'a

rostampoor.40.fid  
ALH  
1H NMR

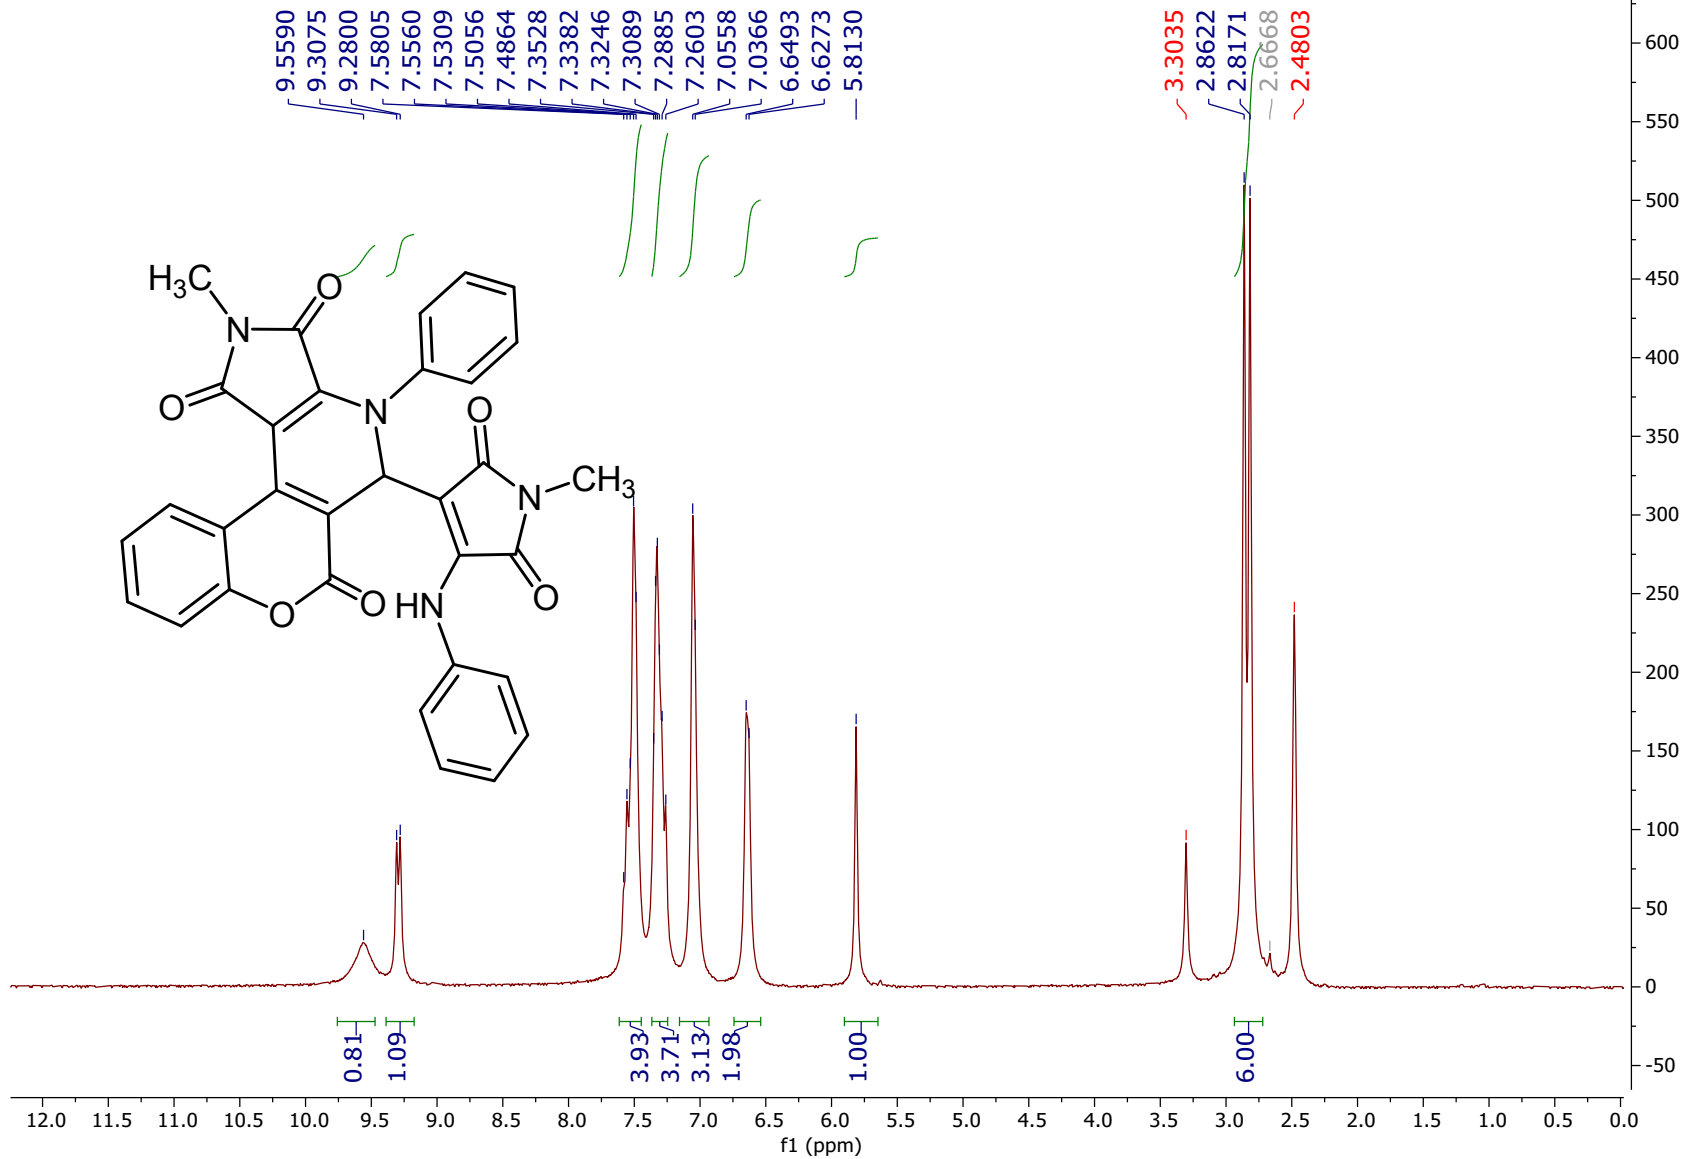

<sup>1</sup>H NMR Spectrum of 3'a  
S48



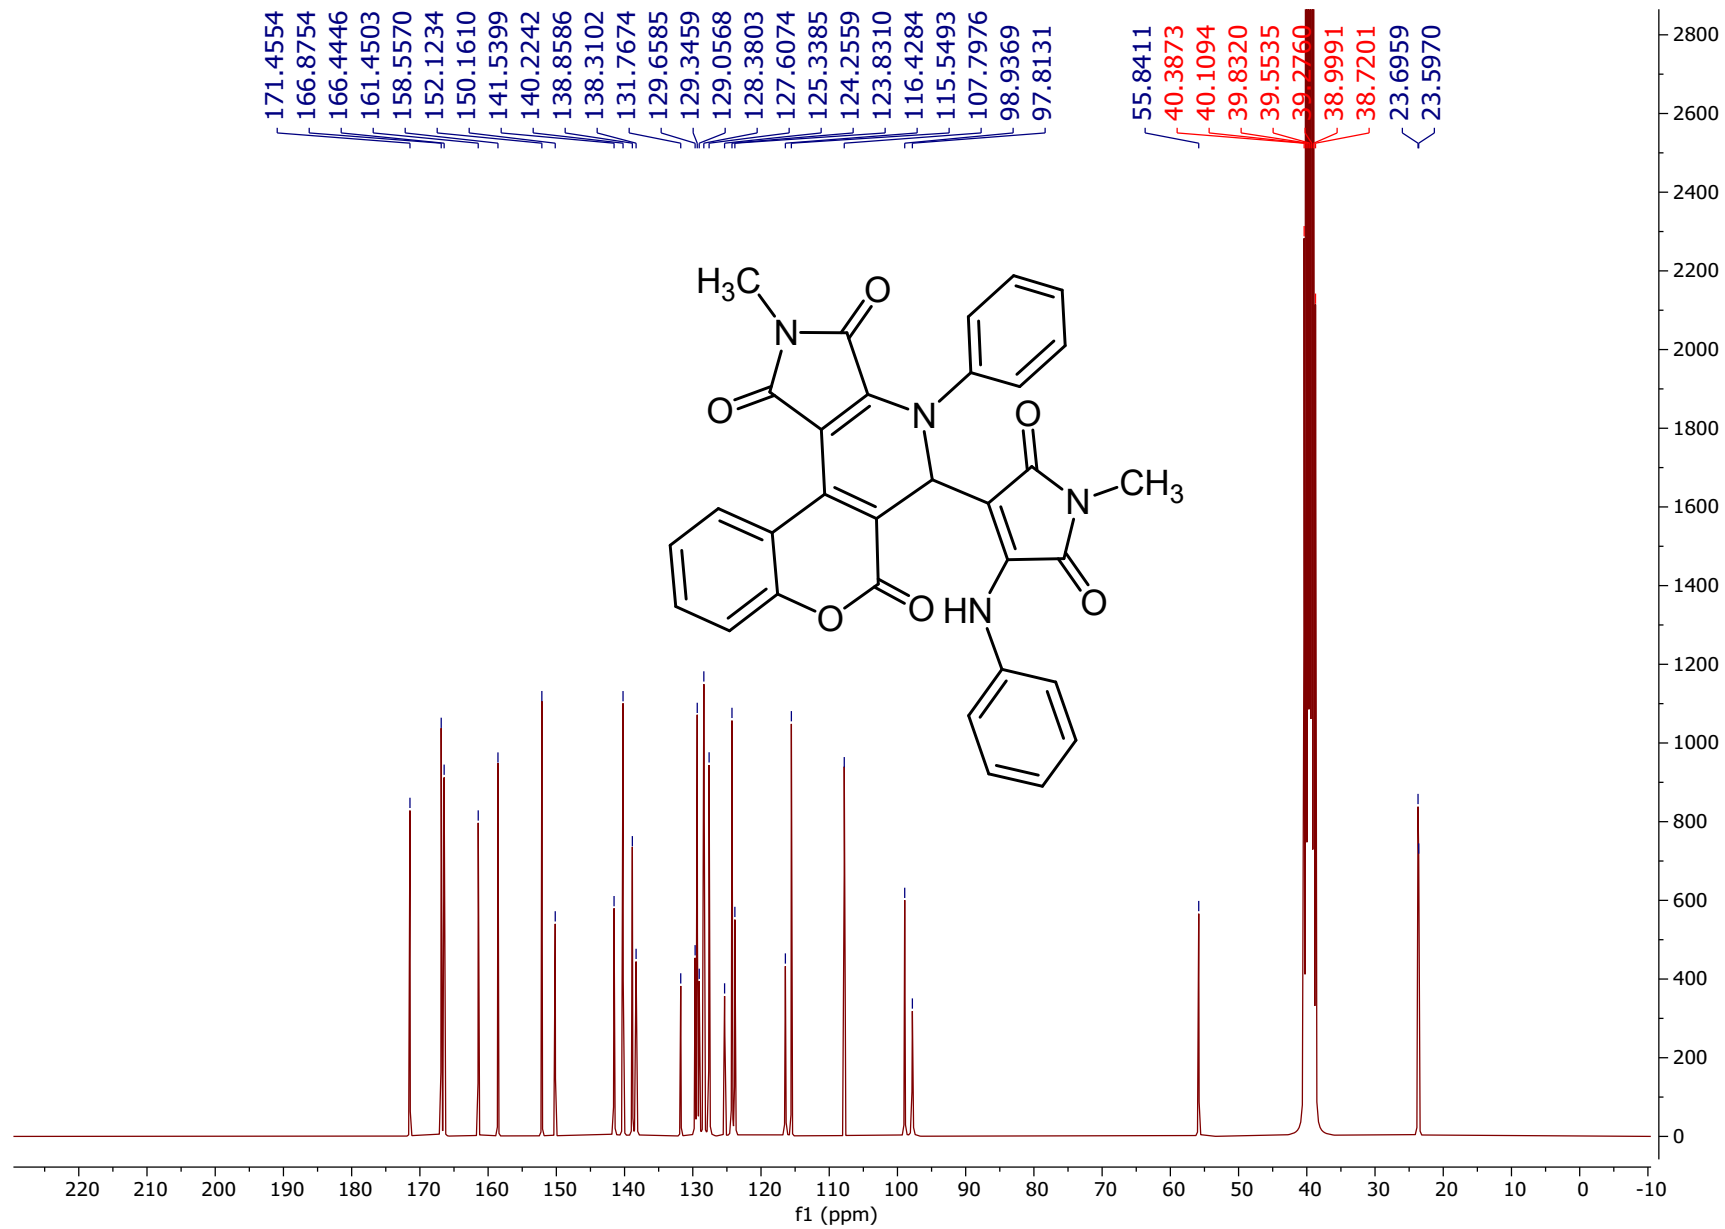

$^{13}\text{C}$  NMR Spectrum of **3'a**

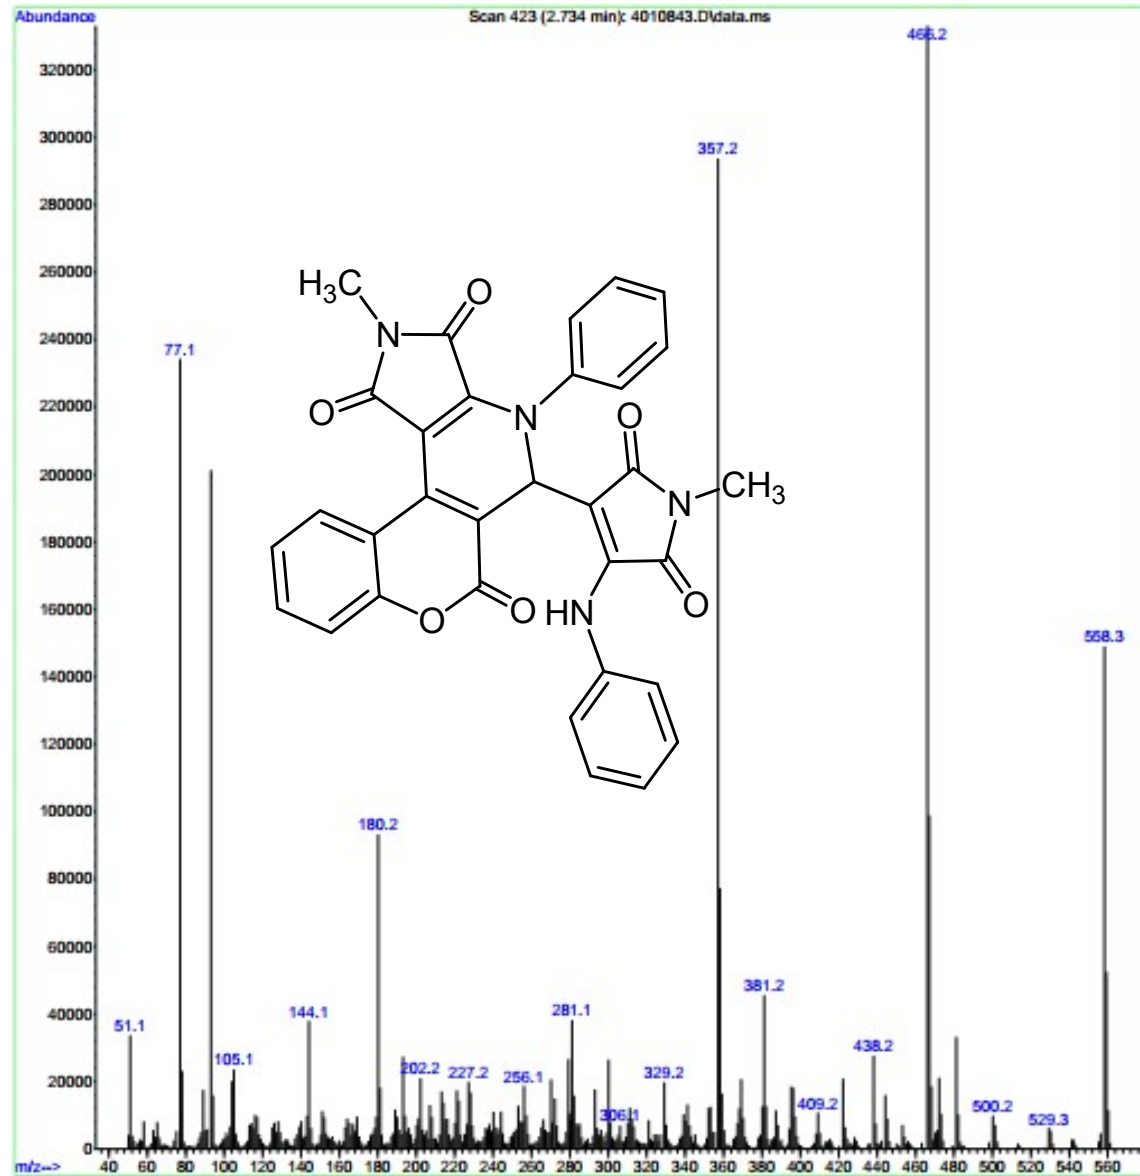

Mass spectrum of 3'a

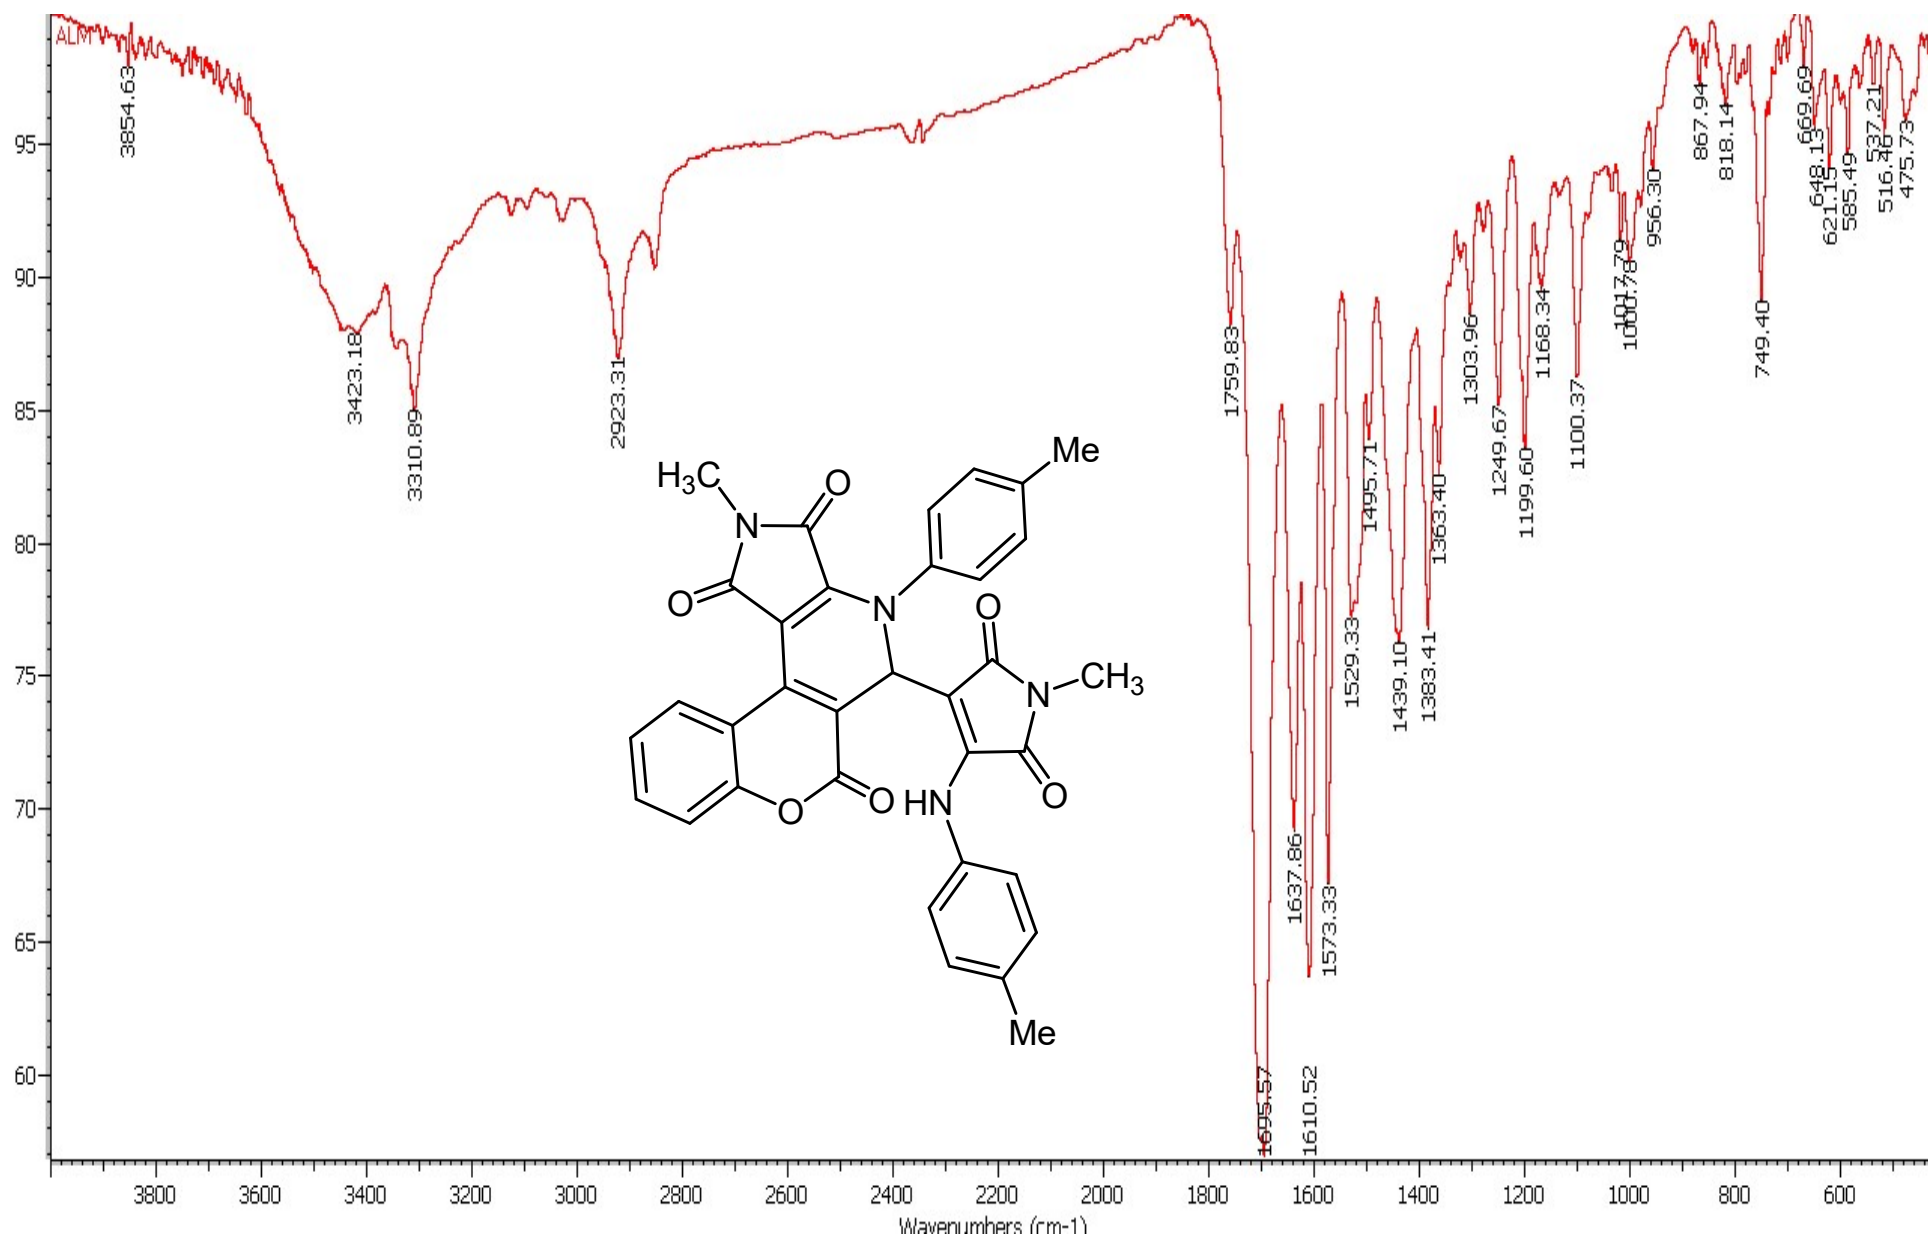

IR spectrum of 3'b

S51

Rostampoor.36.fid  
ALM  
1H NMR

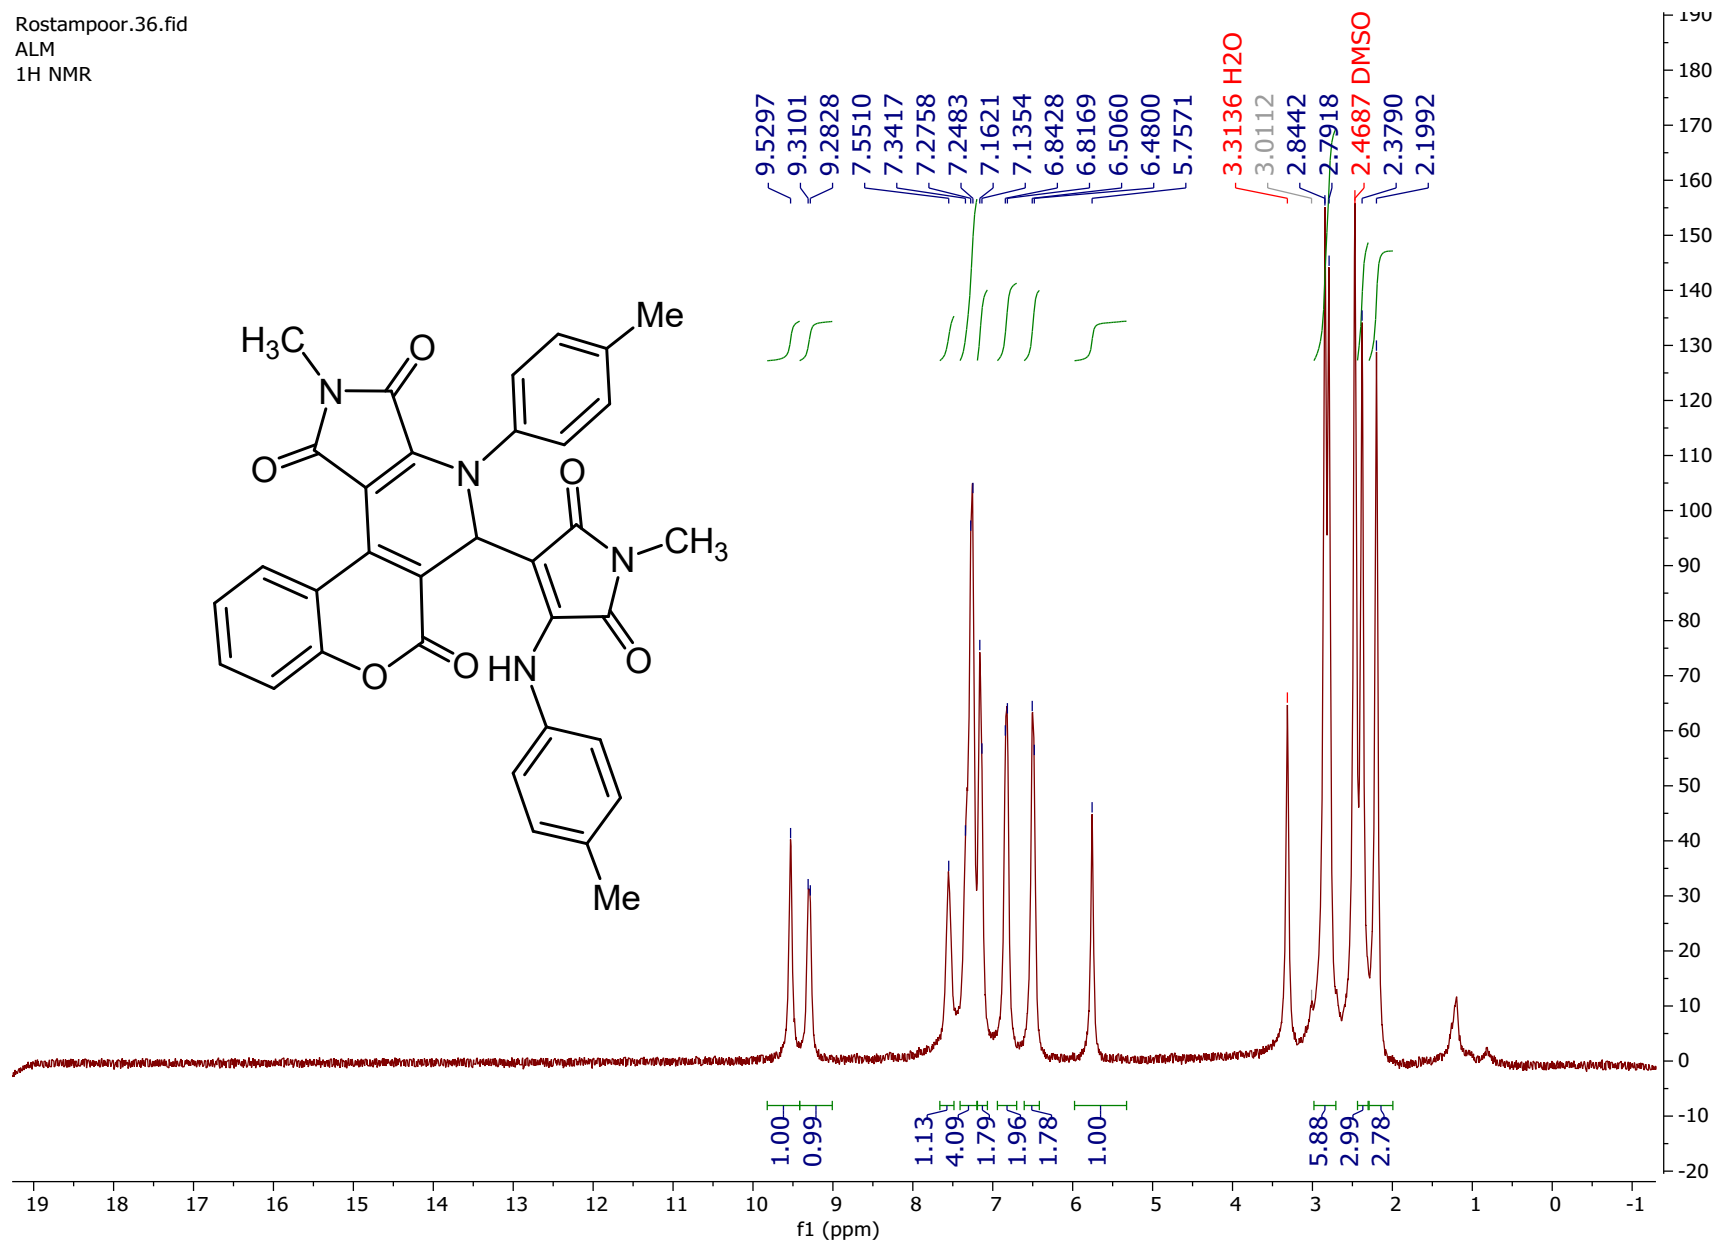

<sup>1</sup>H NMR Spectrum of 3'b  
S52

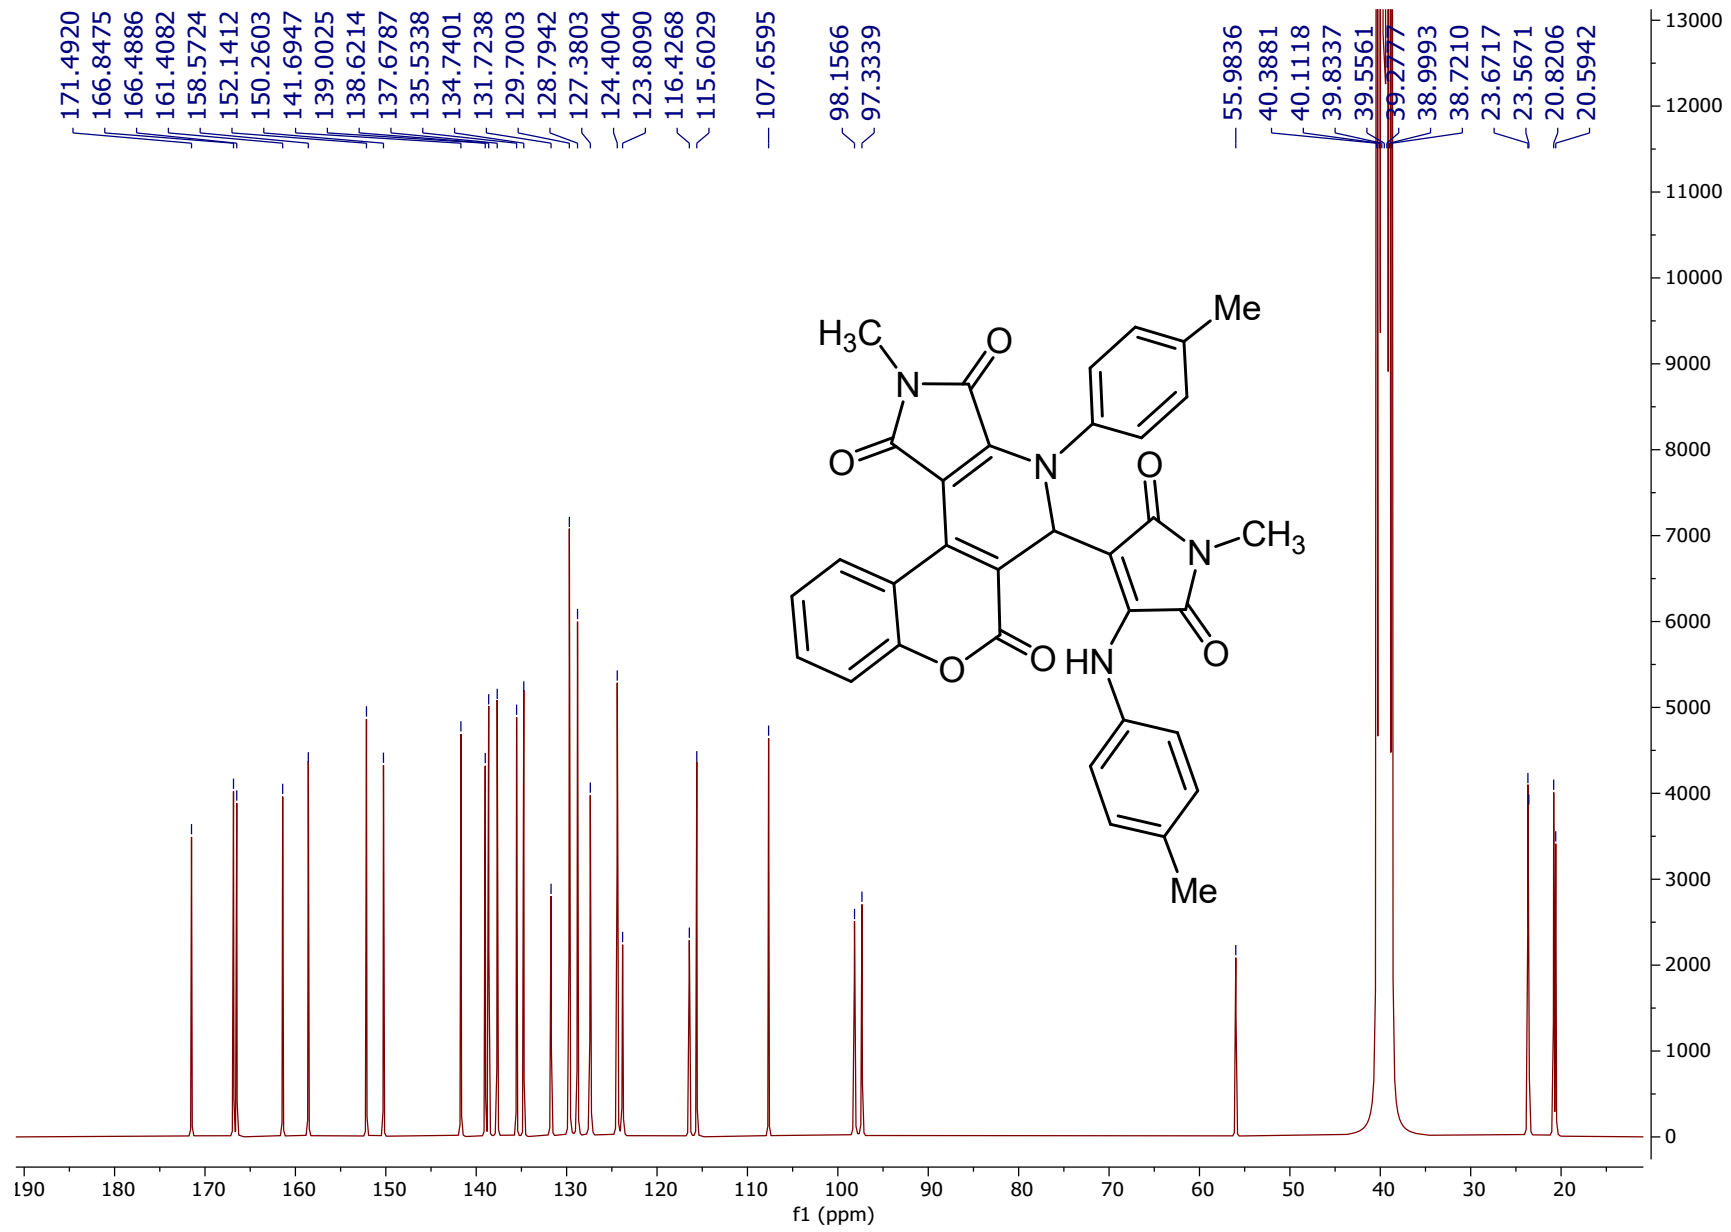

<sup>13</sup>C NMR Spectrum of **3'b**

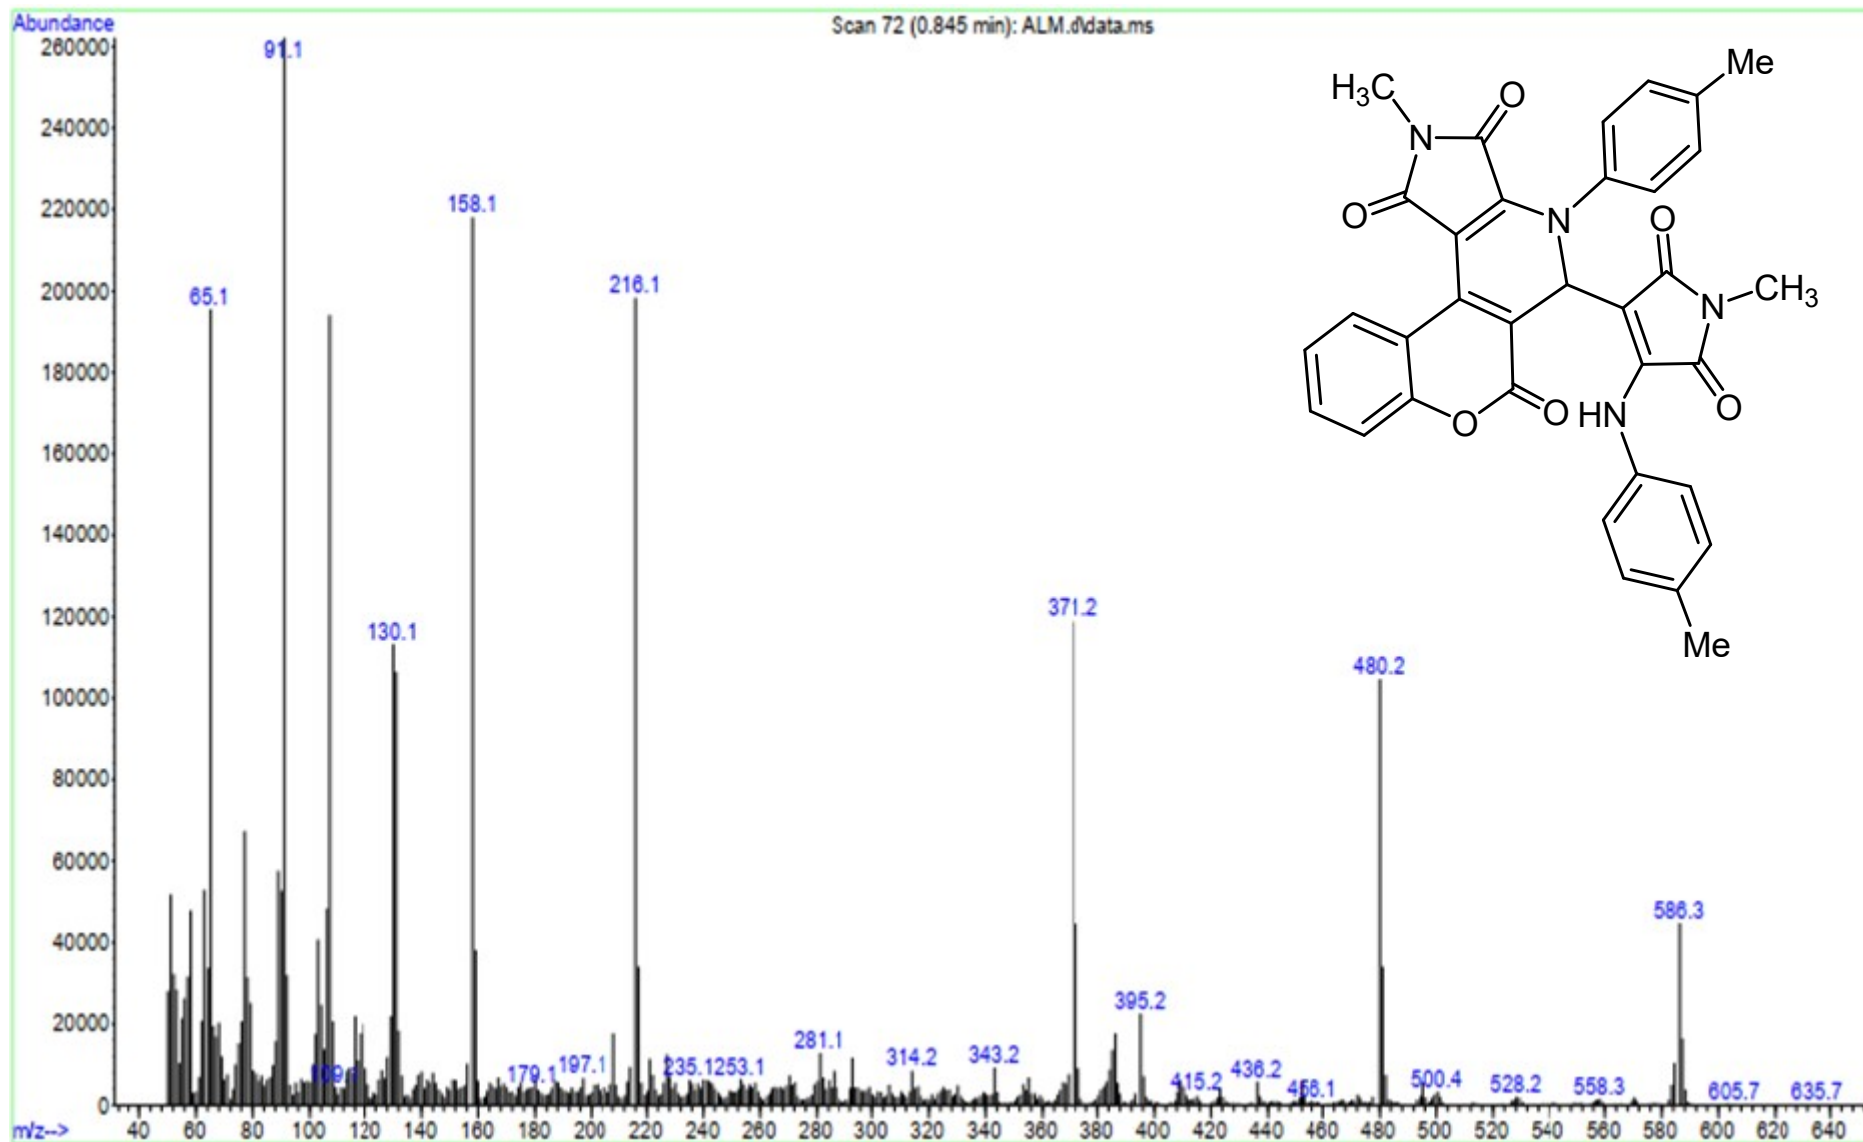

Mass spectrum of **3'b**

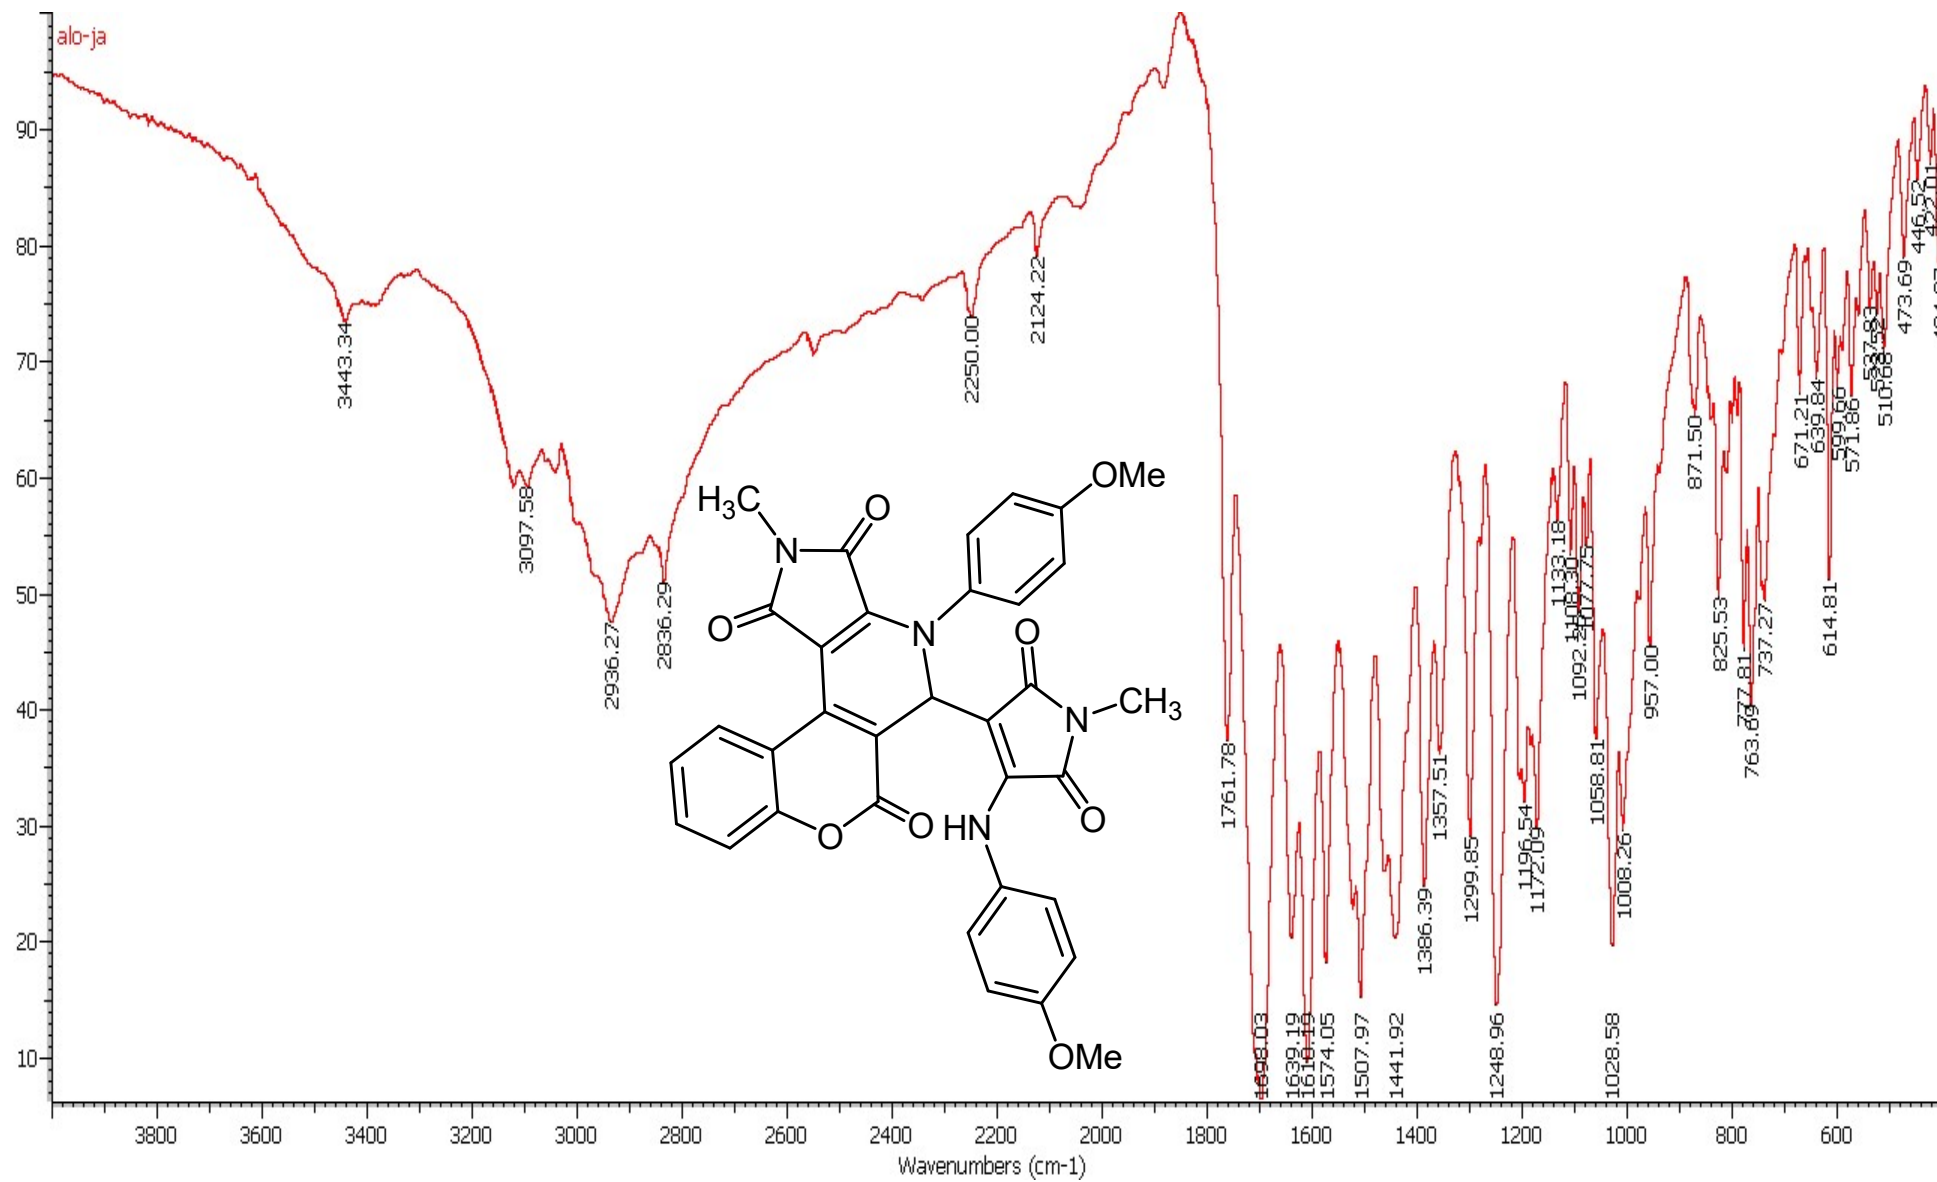

IR spectrum of 3'c

Rostampoor.32.fid  
ALO  
1H NMR

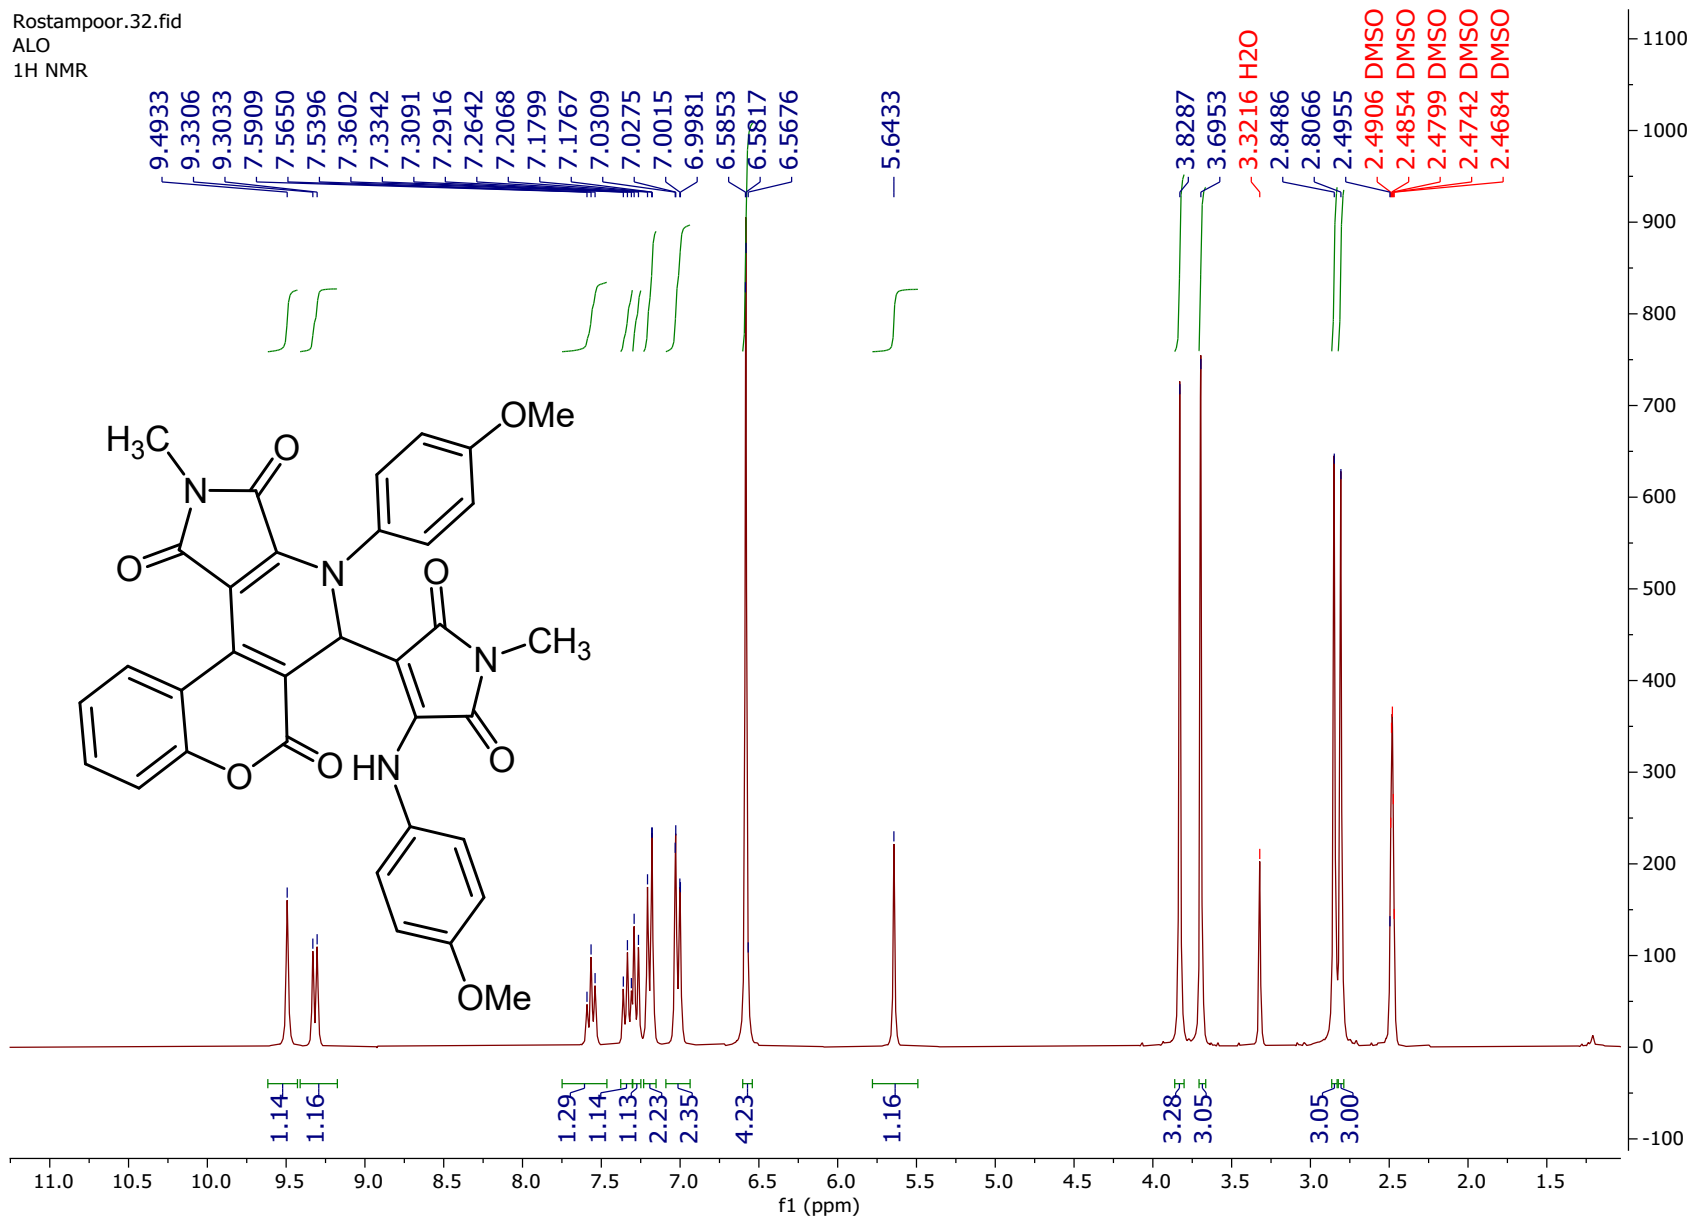

<sup>1</sup>H NMR Spectrum of 3'c



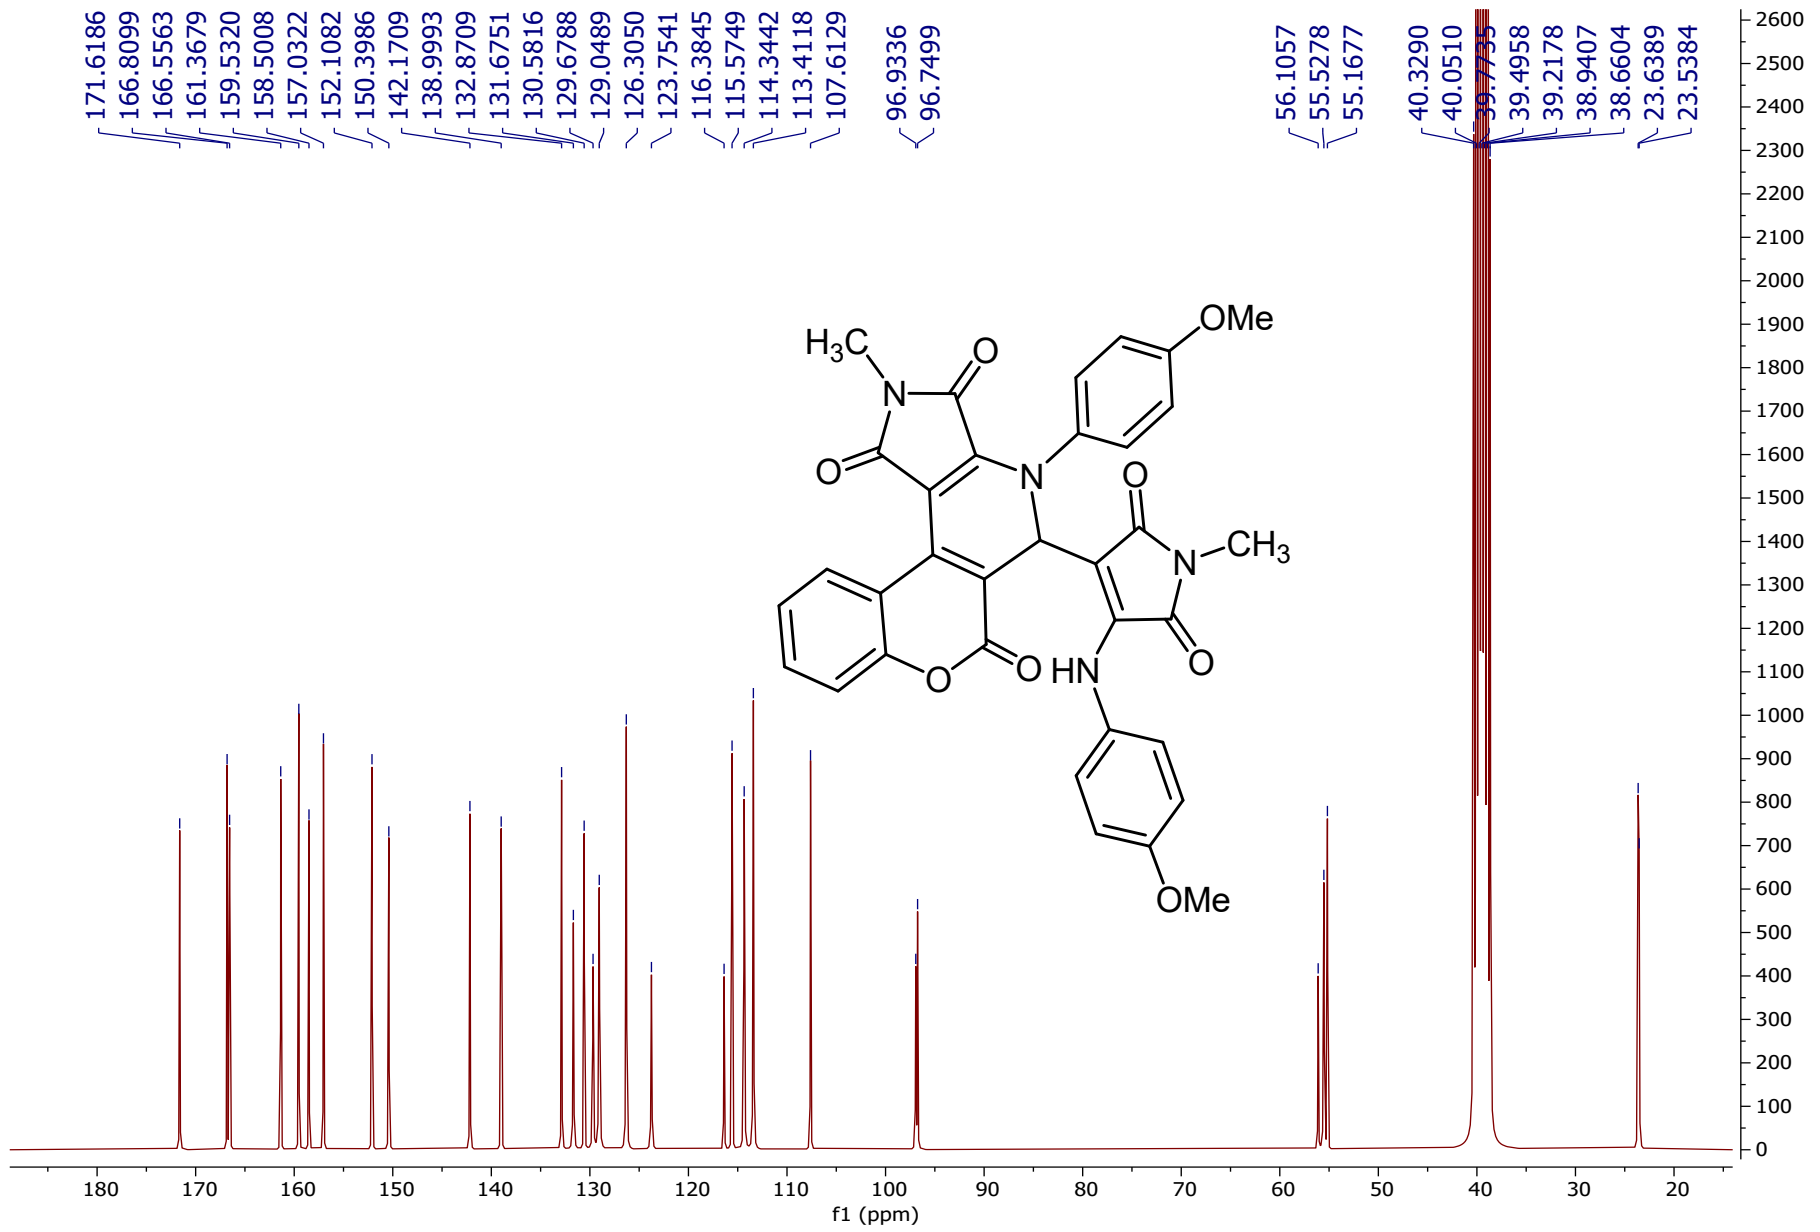

<sup>13</sup>C NMR Spectrum of 3'c

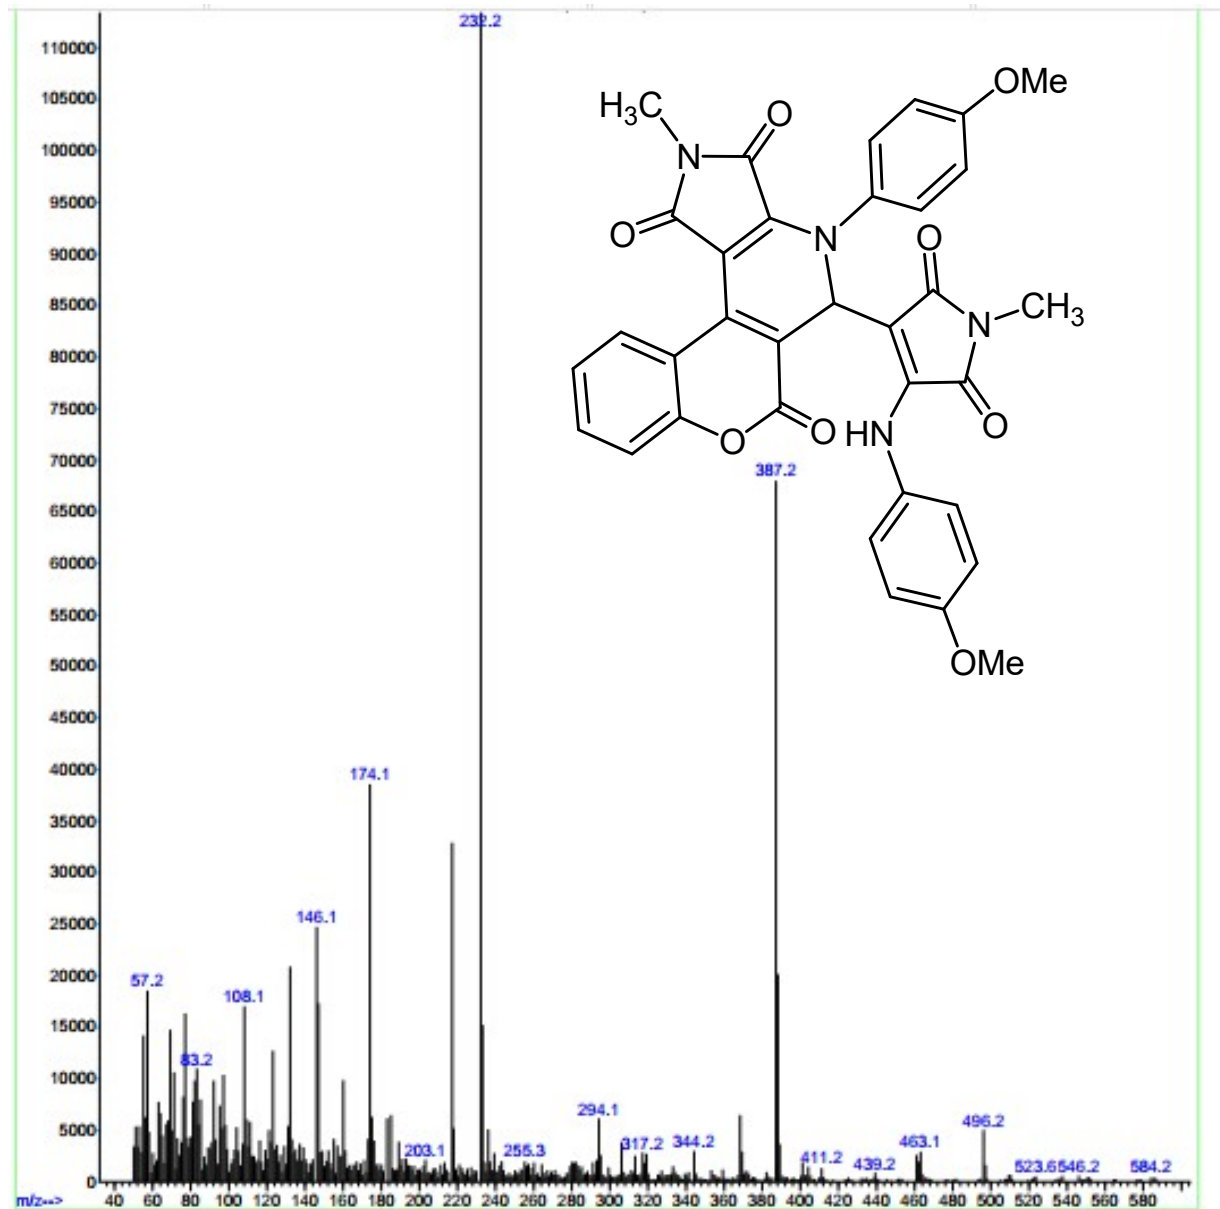

Mass spectrum of 3'c

S58

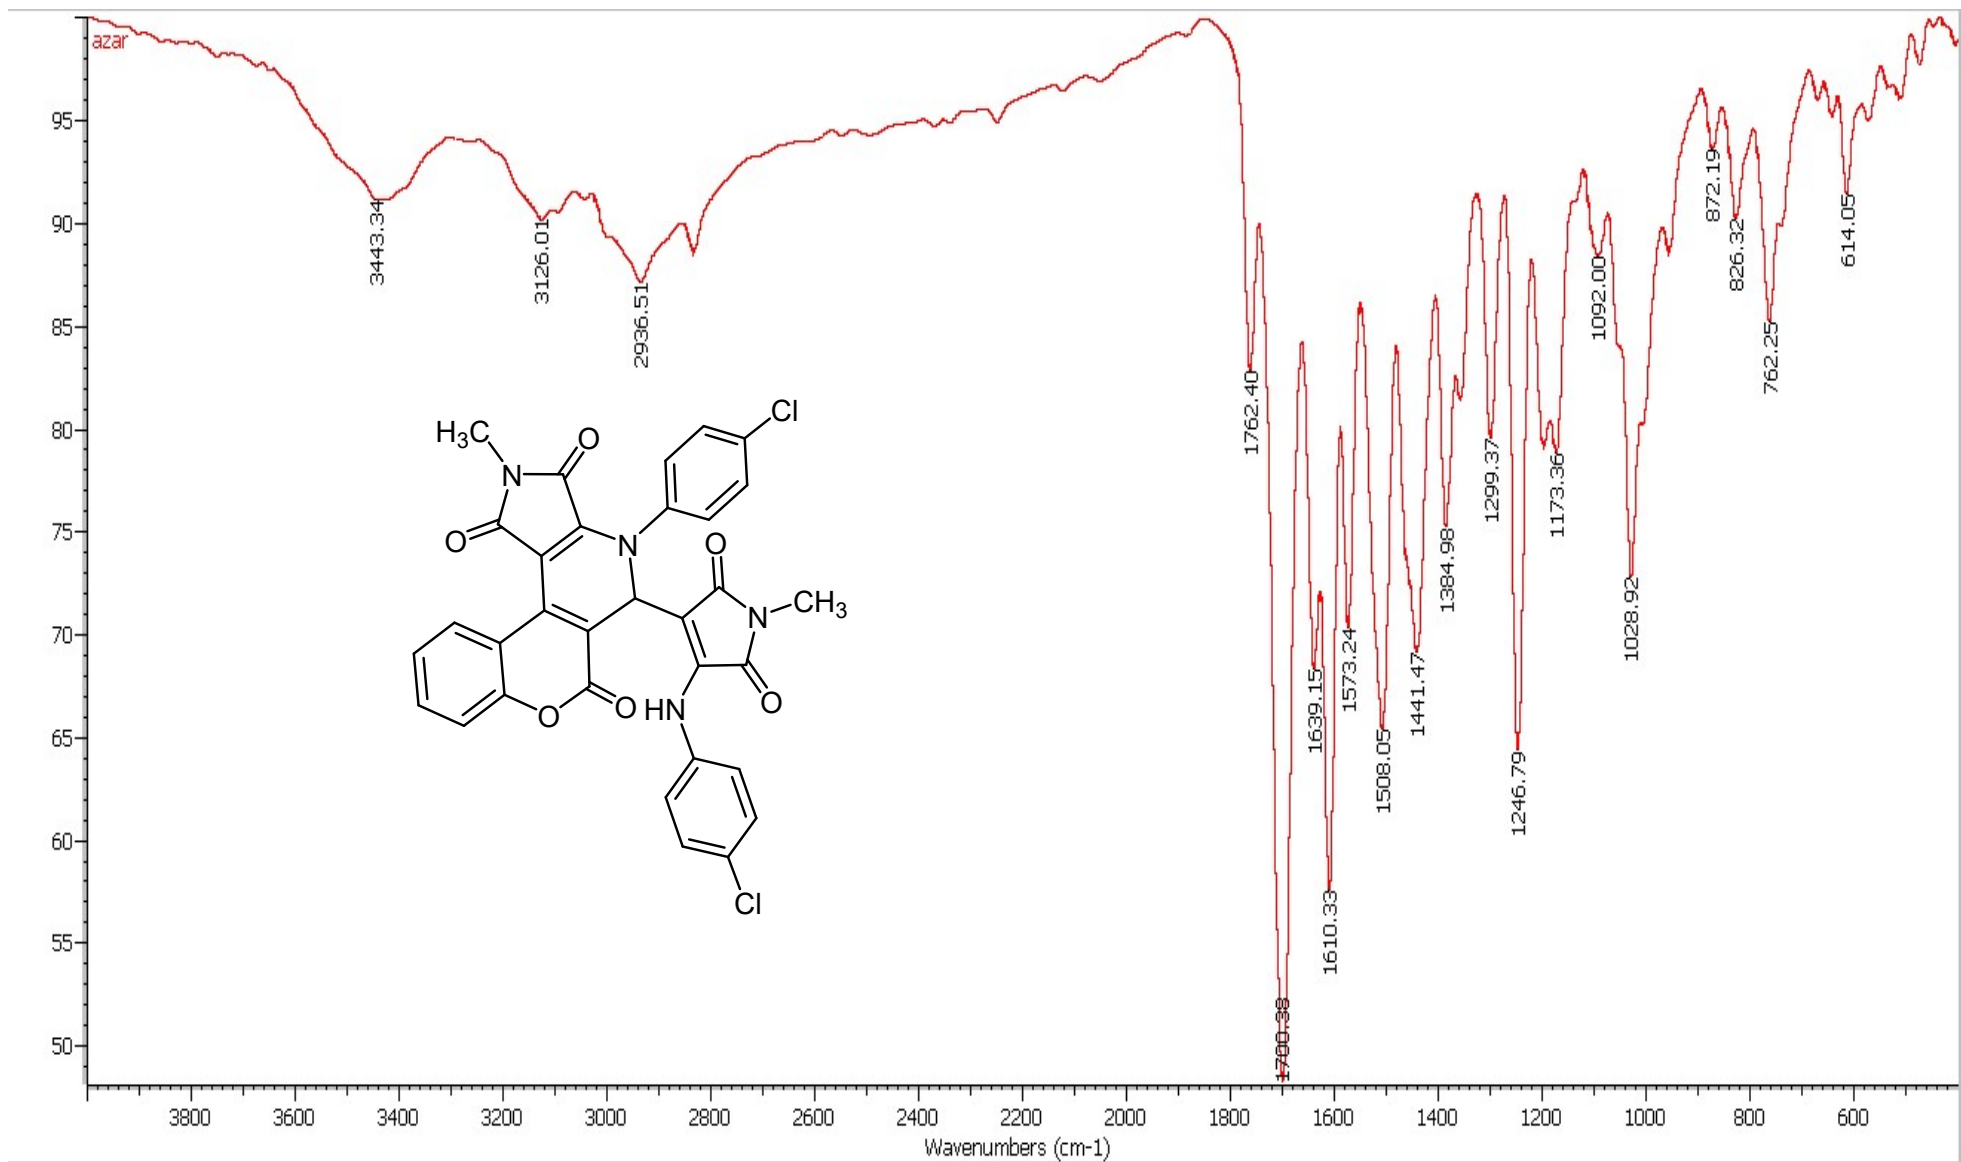

IR spectrum of 3'd

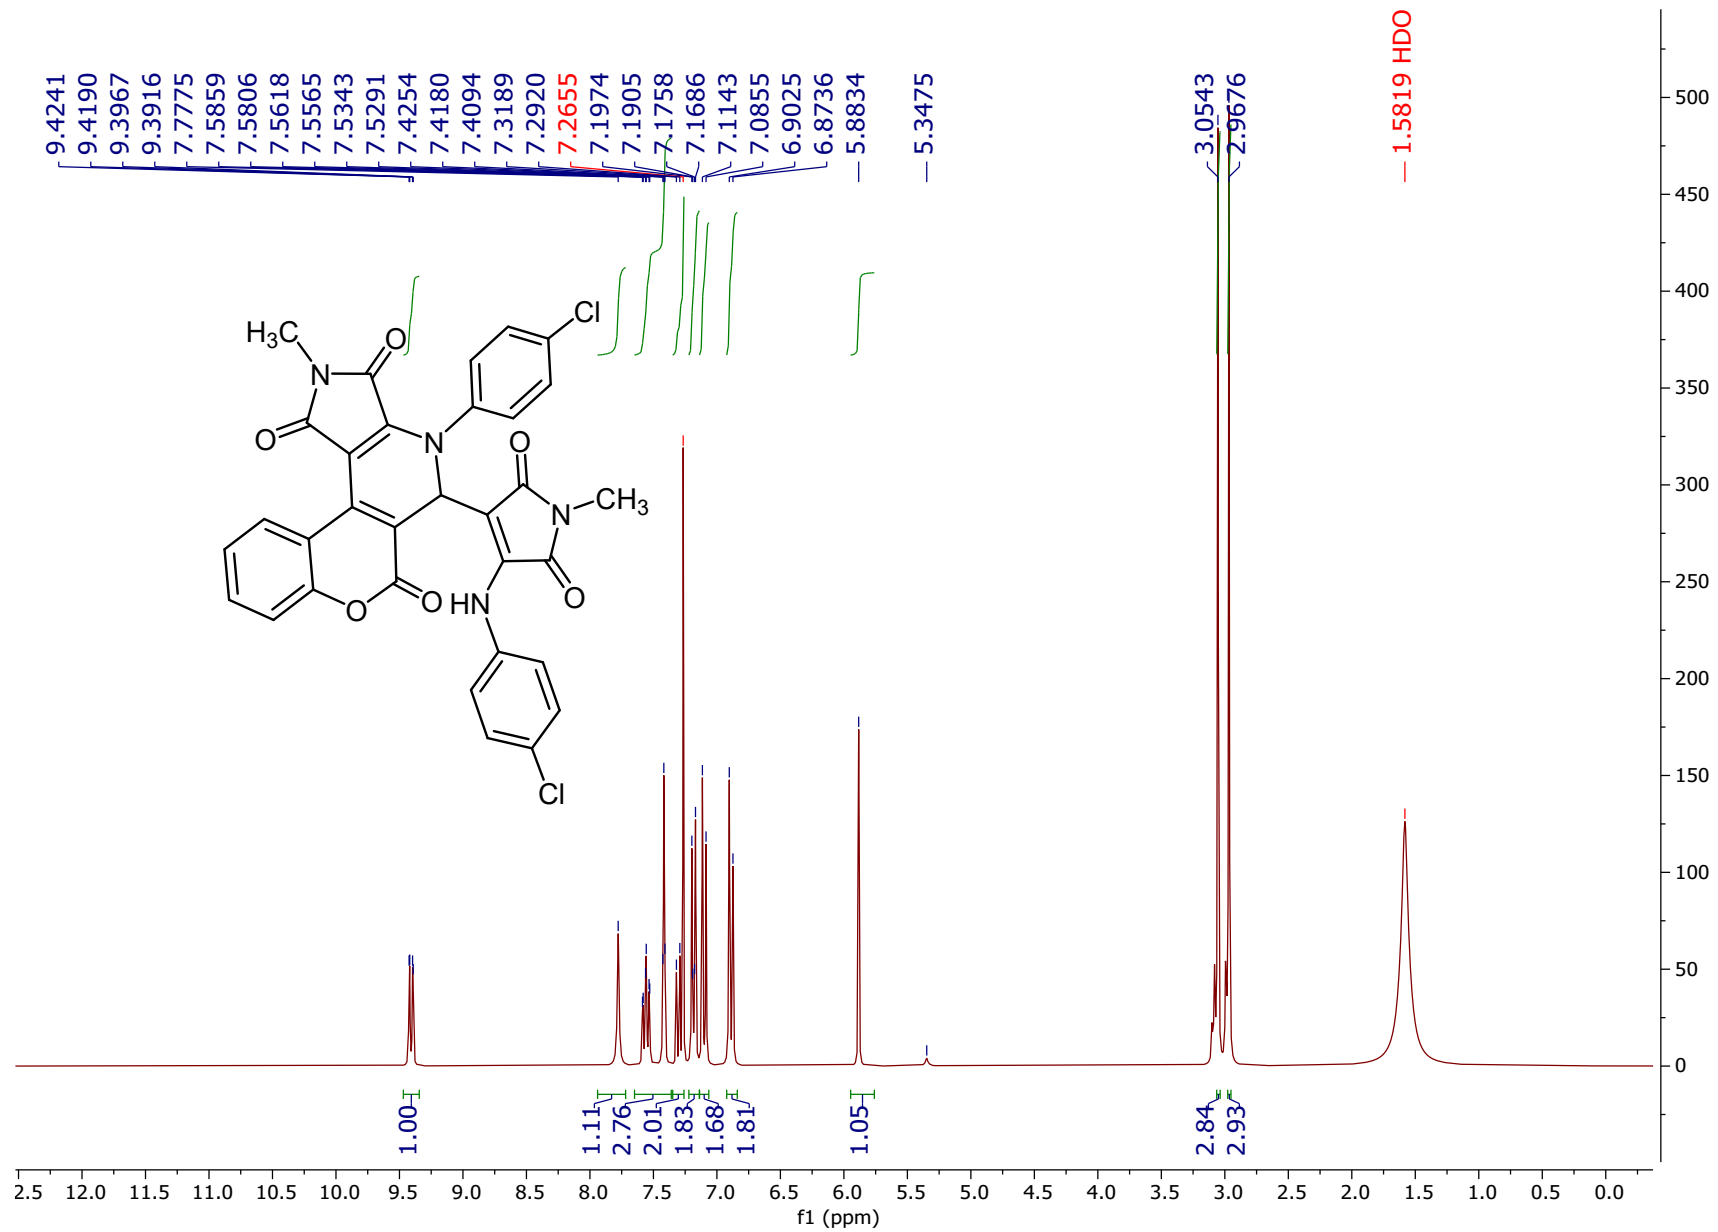

<sup>1</sup>H NMR Spectrum of 3'd

S60

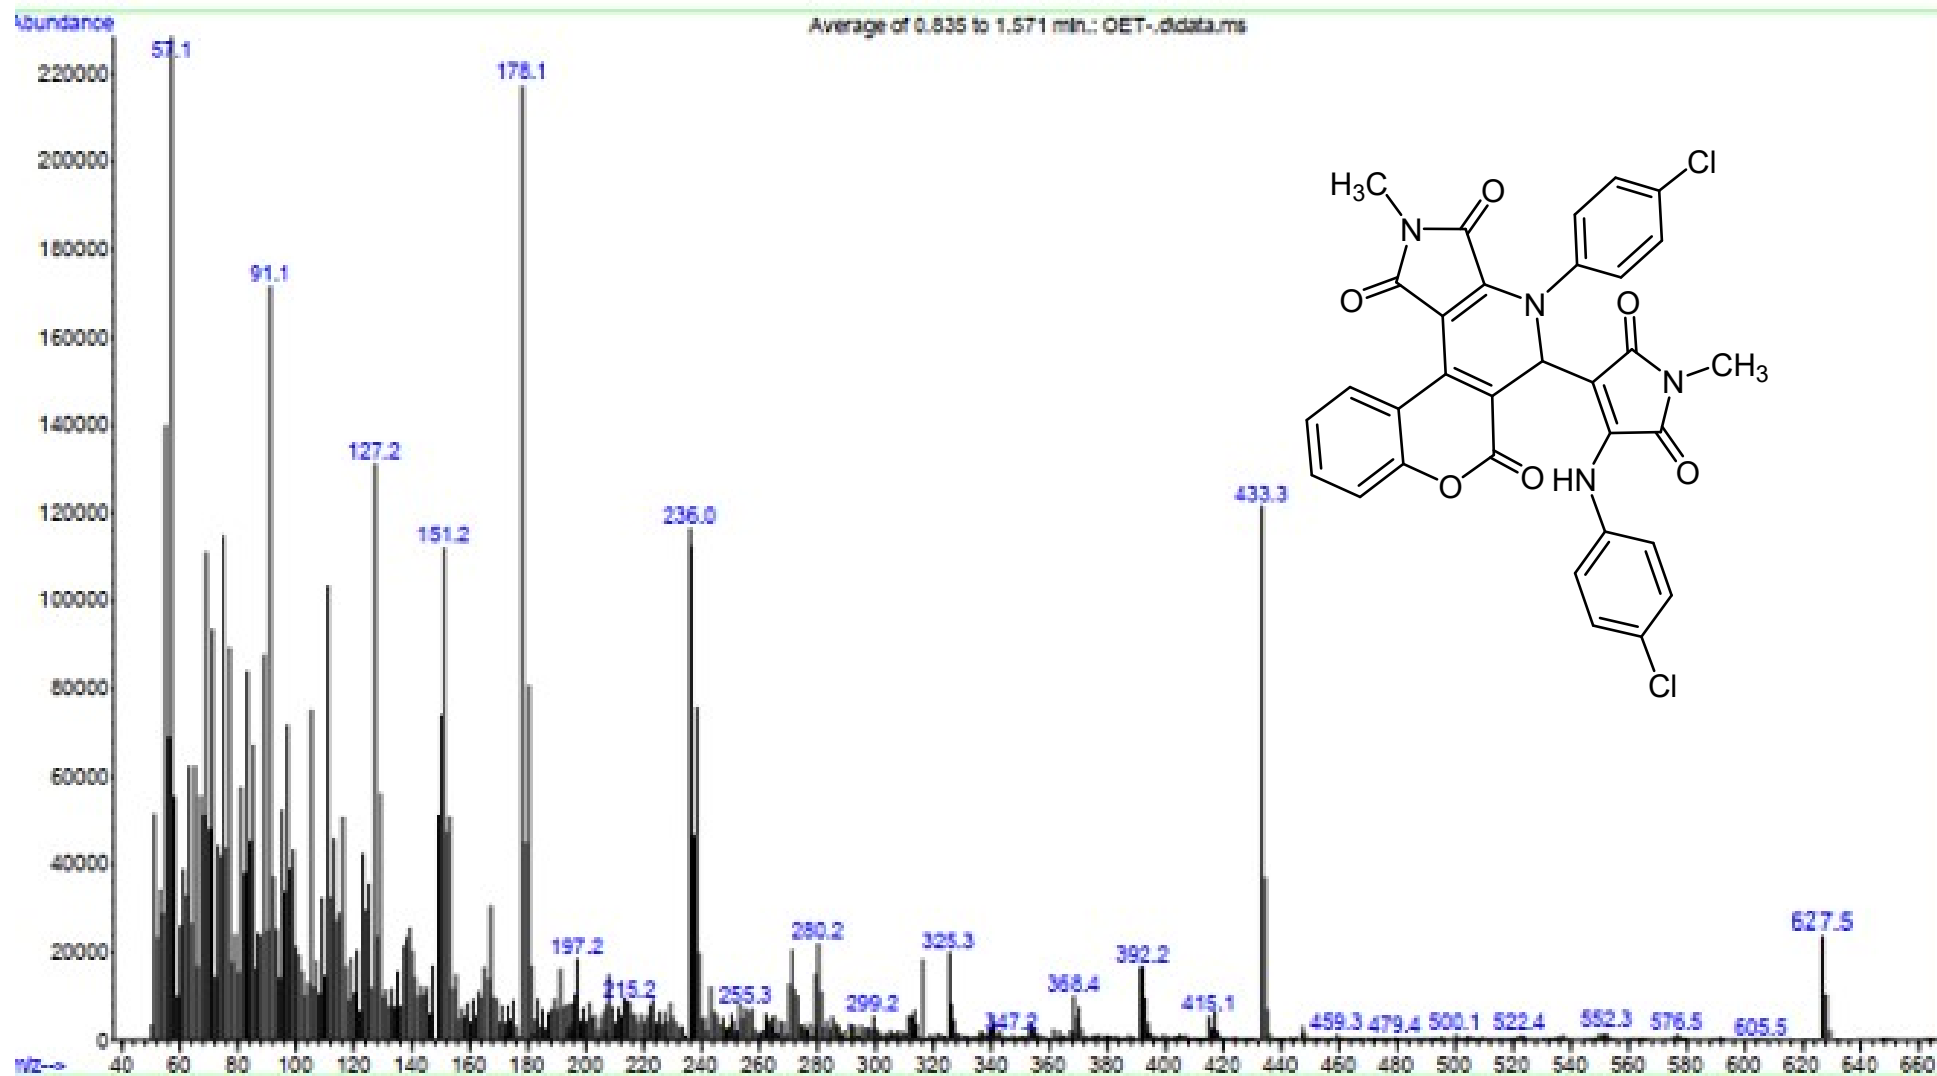

Mass Spectrum of 3'd
